# Supplementary material for: Cu(i)-catalyzed chemical fixation of CO2 with 2-alkynylaniline into 4-hydroxyquinolin-2(1H)-one
Source: Royal Society of Chemistry journal article supplement (doi:10.1039/c3cy00858d), 2013-12-13
Supplement: c3cy00858d.pdf [file c3cy00858d.pdf]

## Supporting Information

### **Cu(I)-catalyzed Chemical Fixation of CO<sub>2</sub> with 2-Alkynylaniline into 4-Hydroxyquinolin-2(1H)-one**

Chun-Xiao Guo, Wen-Zhen Zhang,\* Si Liu and Xiao-Bing Lu

*State Key Laboratory of Fine Chemicals, Dalian University of Technology, Dalian,  
116024, China*

*E-mail: zhangwz@dlut.edu.cn*

#### **Table of Contents**

|                                                                                   |           |
|-----------------------------------------------------------------------------------|-----------|
| <b>Crystallographic data for 2q and 2s</b>                                        | <b>S2</b> |
| <b>Copies of <sup>1</sup>H NMR and <sup>13</sup>C NMR Spectra of the Products</b> | <b>S3</b> |

**Table S1.** Crystallographic data for **2q** and **2s**

|                                                               | <b>2q</b>                                       | <b>2s</b>                                                      |
|---------------------------------------------------------------|-------------------------------------------------|----------------------------------------------------------------|
| formula                                                       | C <sub>21</sub> H <sub>23</sub> NO <sub>2</sub> | C <sub>21</sub> H <sub>20</sub> F <sub>3</sub> NO <sub>2</sub> |
| formula weight                                                | 321.40                                          | 375.38                                                         |
| color                                                         | white                                           | white                                                          |
| crystal system                                                | triclinic                                       | triclinic                                                      |
| space group                                                   | <i>P</i> 1                                      | <i>P</i> 1                                                     |
| <i>a</i> , Å                                                  | 7.7051(4)                                       | 6.1860(5)                                                      |
| <i>b</i> , Å                                                  | 10.8189(5)                                      | 9.6029(9)                                                      |
| <i>c</i> , Å                                                  | 11.1726(5)                                      | 16.4251(11)                                                    |
| $\alpha$ , deg                                                | 75.918(3)                                       | 77.495(6)                                                      |
| $\beta$ , deg                                                 | 86.590(3)                                       | 80.955(6)                                                      |
| $\gamma$ , deg                                                | 87.802(3)                                       | 87.557(7)                                                      |
| <i>V</i> , Å <sup>3</sup>                                     | 901.49(7)                                       | 940.68(13)                                                     |
| <i>Z</i>                                                      | 2                                               | 2                                                              |
| <i>T</i> , K                                                  | 296(2)                                          | 296(2)                                                         |
| $\mu$ , mm <sup>-1</sup>                                      | 0.076                                           | 0.105                                                          |
| <i>F</i> (000)                                                | 344                                             | 392                                                            |
| $\theta$ range, deg                                           | 1.94 to 24.99                                   | 2.17 to 24.99                                                  |
| index ranges ( <i>h</i> , <i>k</i> , <i>l</i> )               | ±9, ±12, -12 to 13                              | ±7, -11 to 10, ±19                                             |
| reflections collected                                         | 6207                                            | 5416                                                           |
| independent reflections / <i>R</i> <sub>int</sub>             | 3156/0.0170                                     | 3279/0.0279                                                    |
| obsd reflections ( <i>I</i> > 2 $\sigma$ ( <i>I</i> ))        | 2539                                            | 1579                                                           |
| data/restraints/parameters                                    | 3156/0/217                                      | 3279/0/244                                                     |
| <i>R</i> 1/ <i>wR</i> 2 ( <i>I</i> > 2 $\sigma$ ( <i>I</i> )) | 0.0469/0.1415                                   | 0.0993/0.2961                                                  |
| <i>R</i> 1/ <i>wR</i> 2 (all data)                            | 0.0573/0.1522                                   | 0.1723/0.3474                                                  |
| GOF (on <i>F</i> <sup>2</sup> )                               | 1.080                                           | 1.047                                                          |

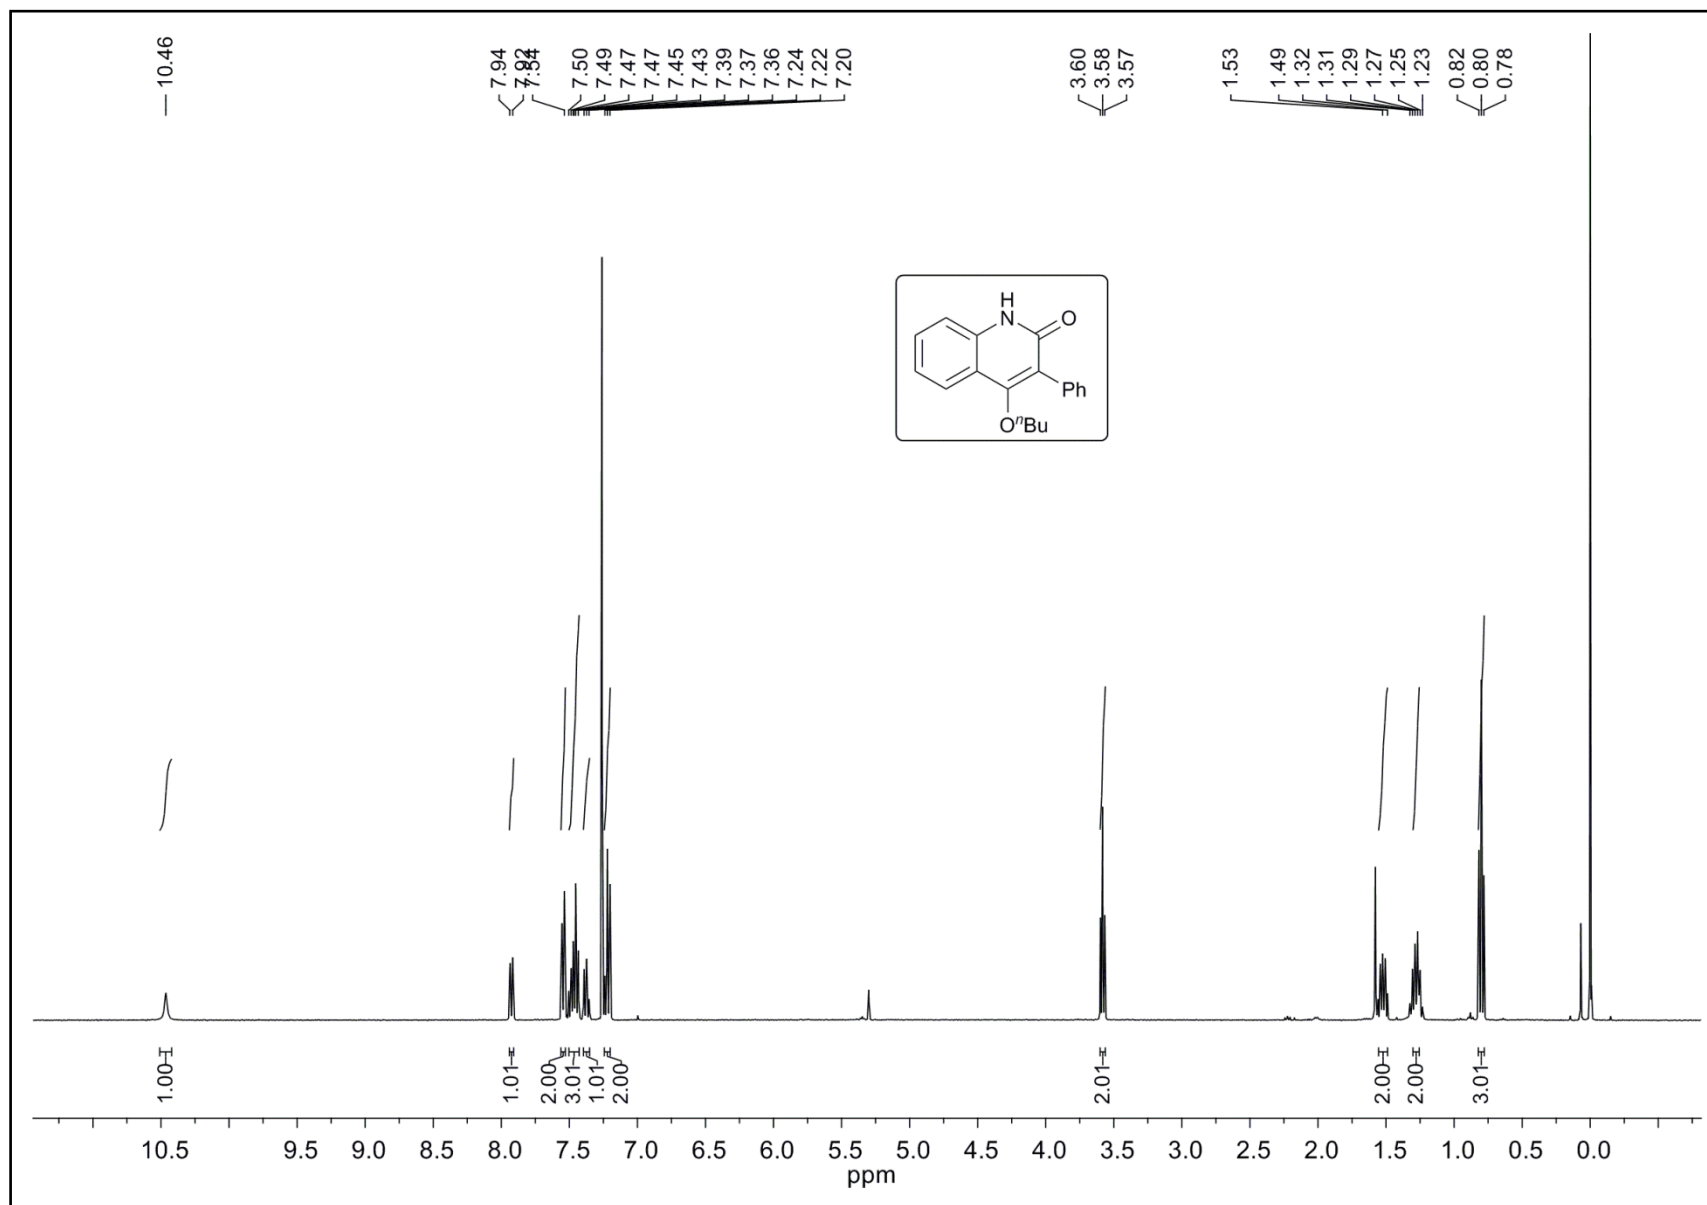

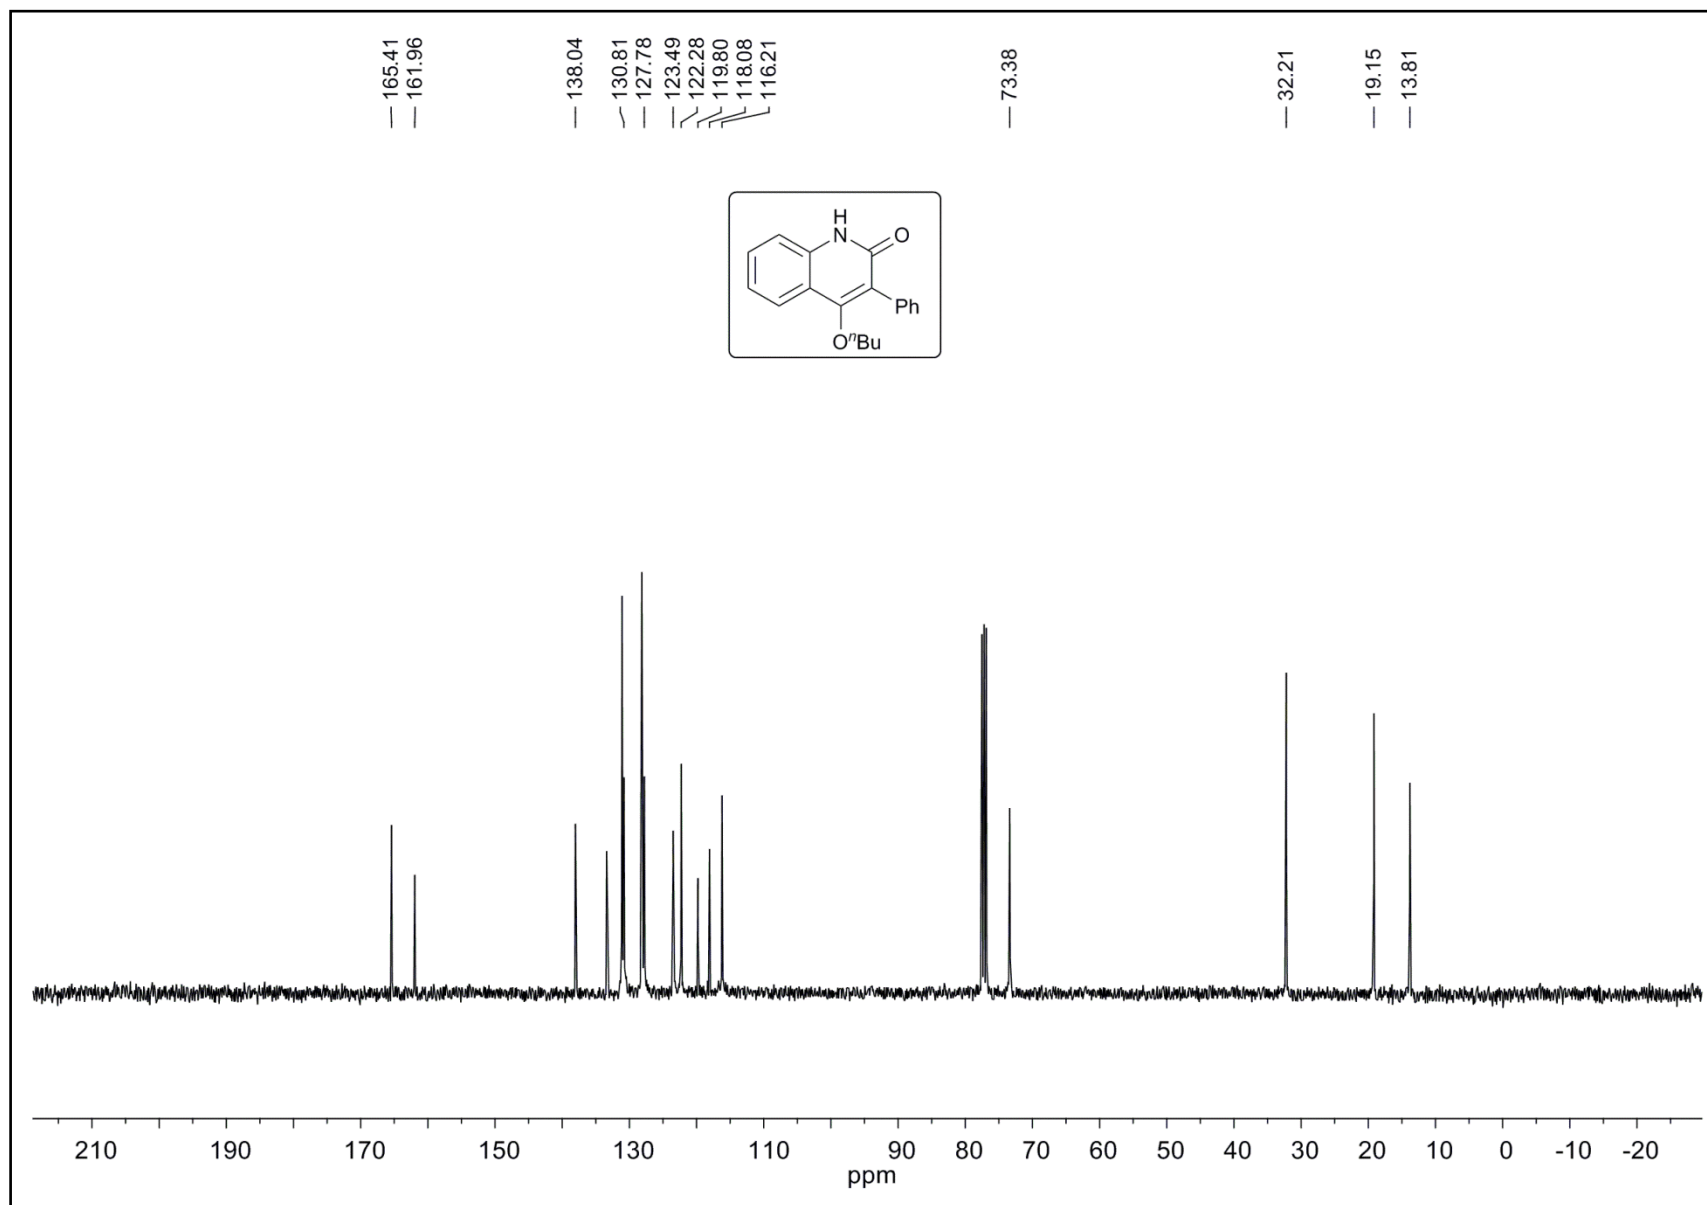

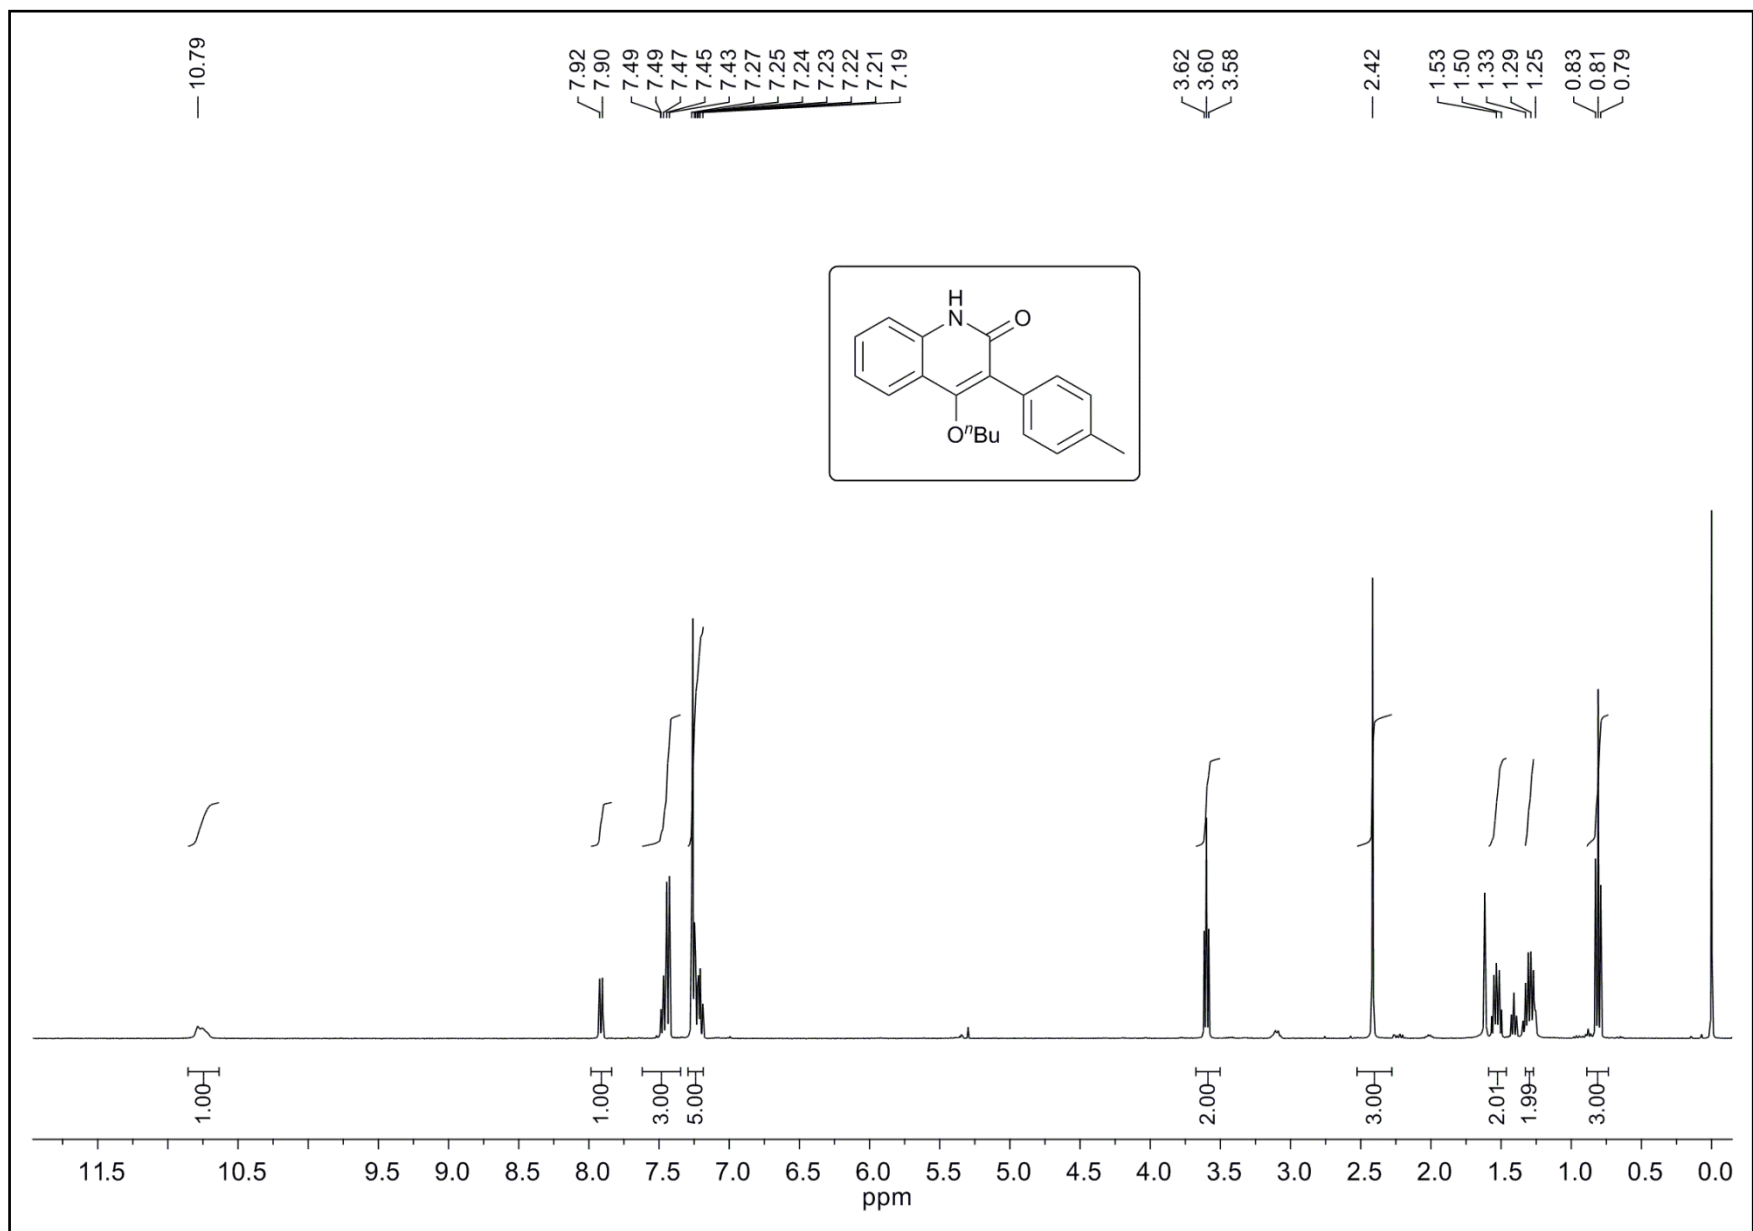

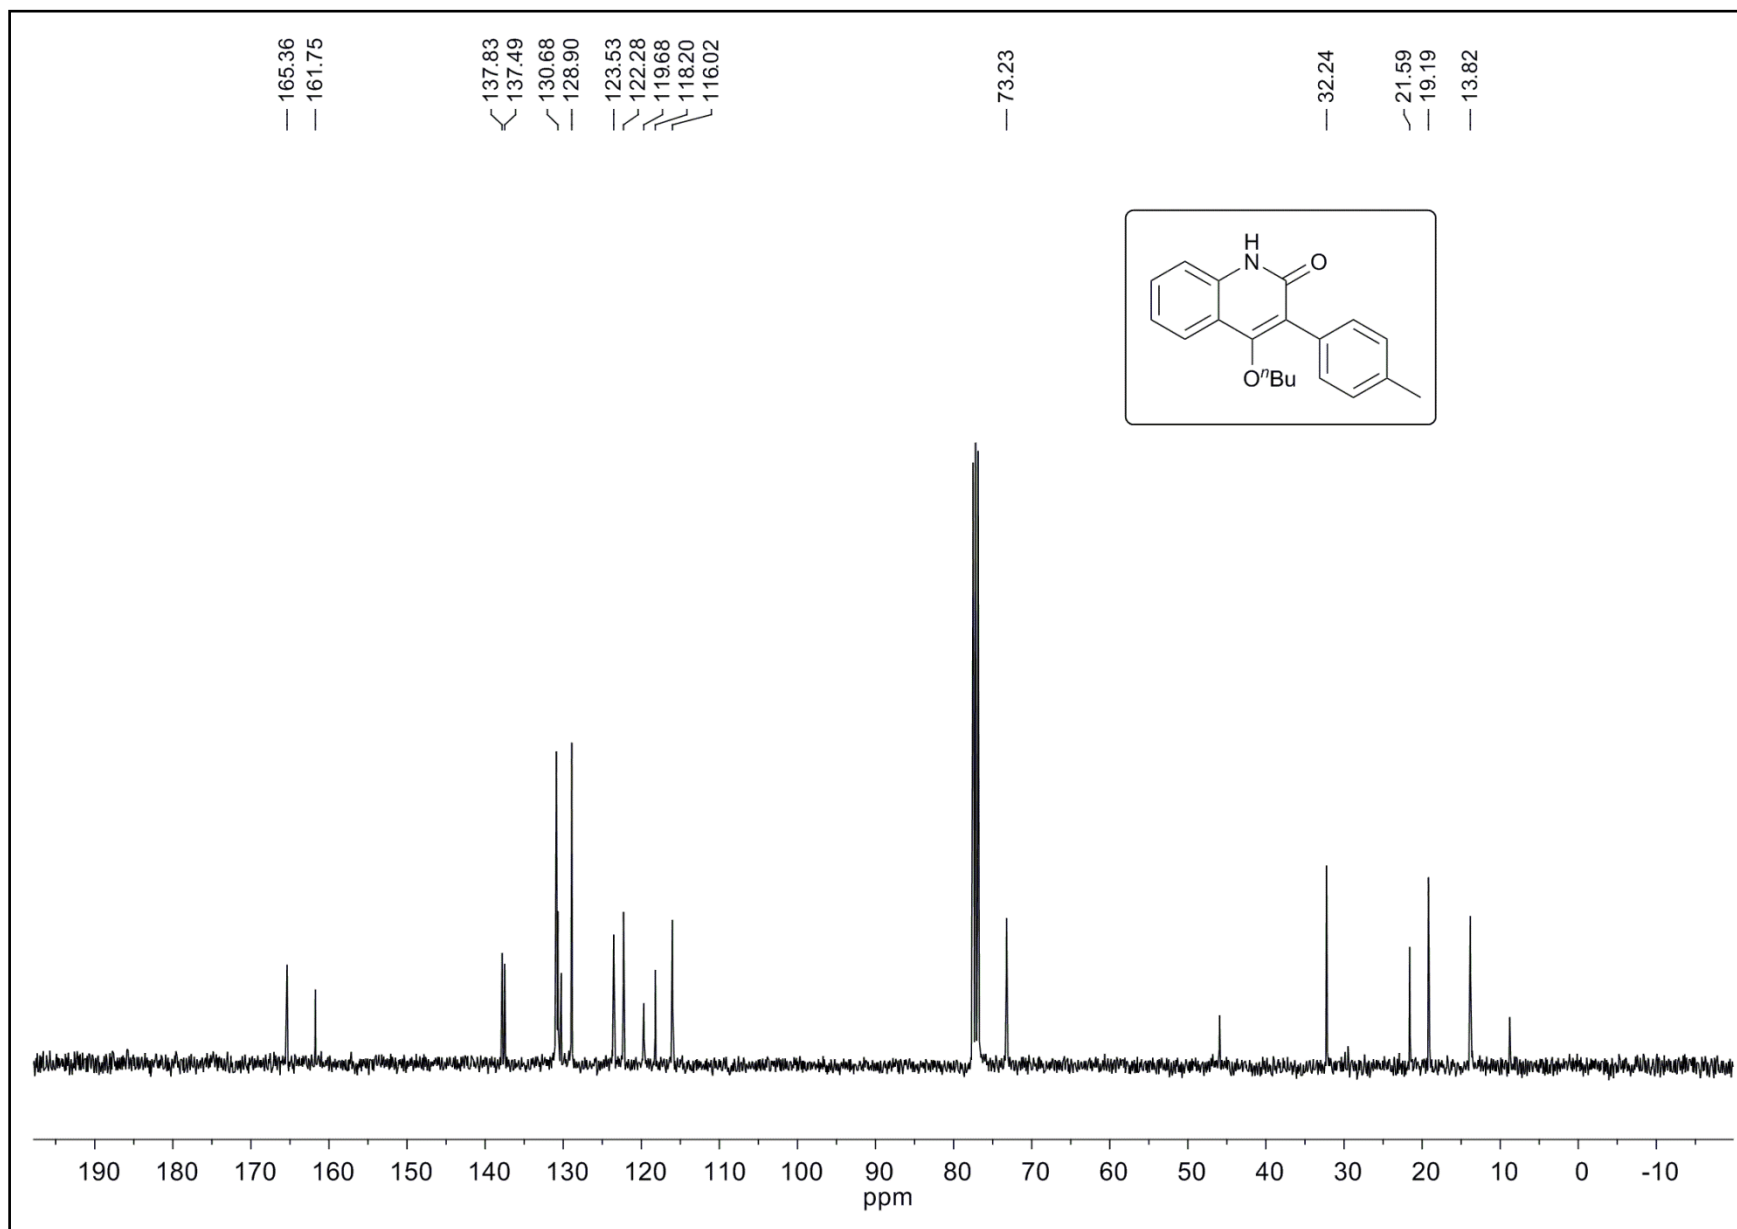

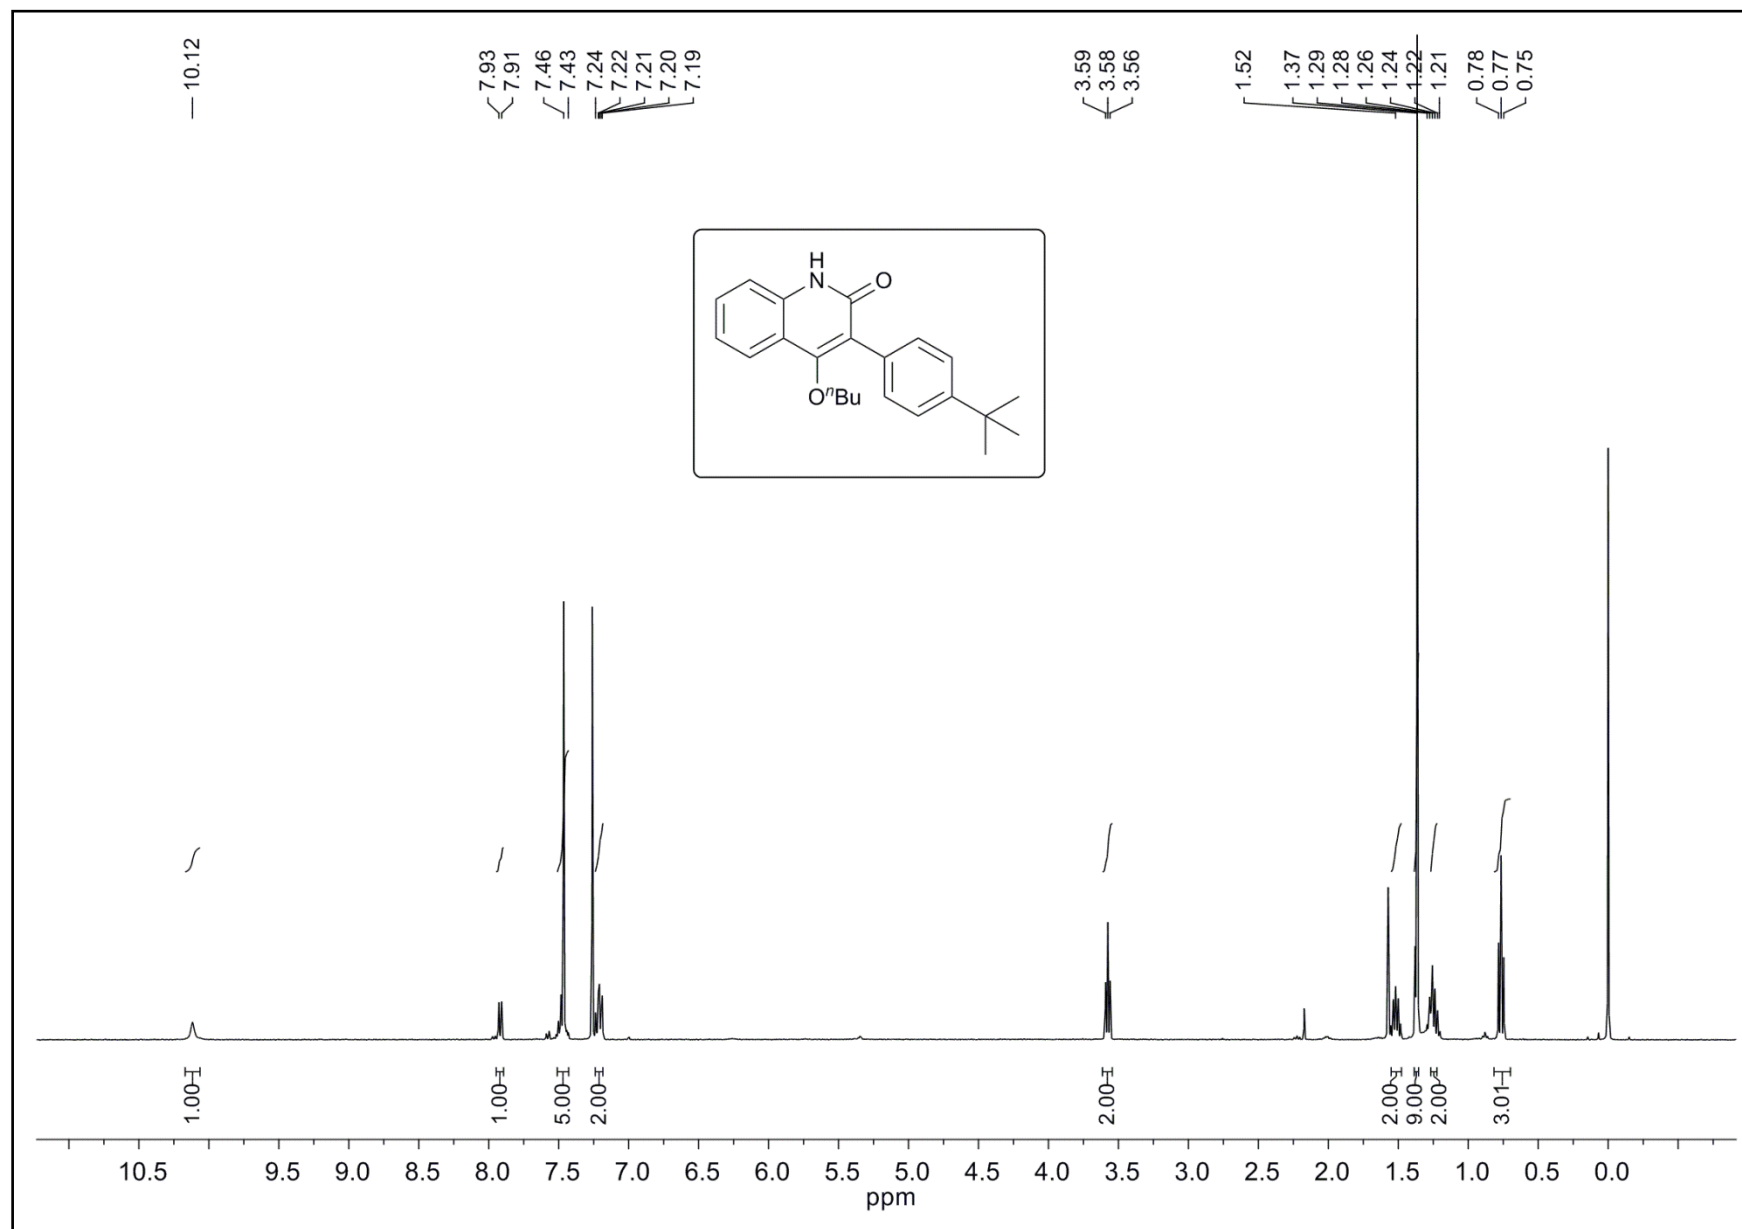

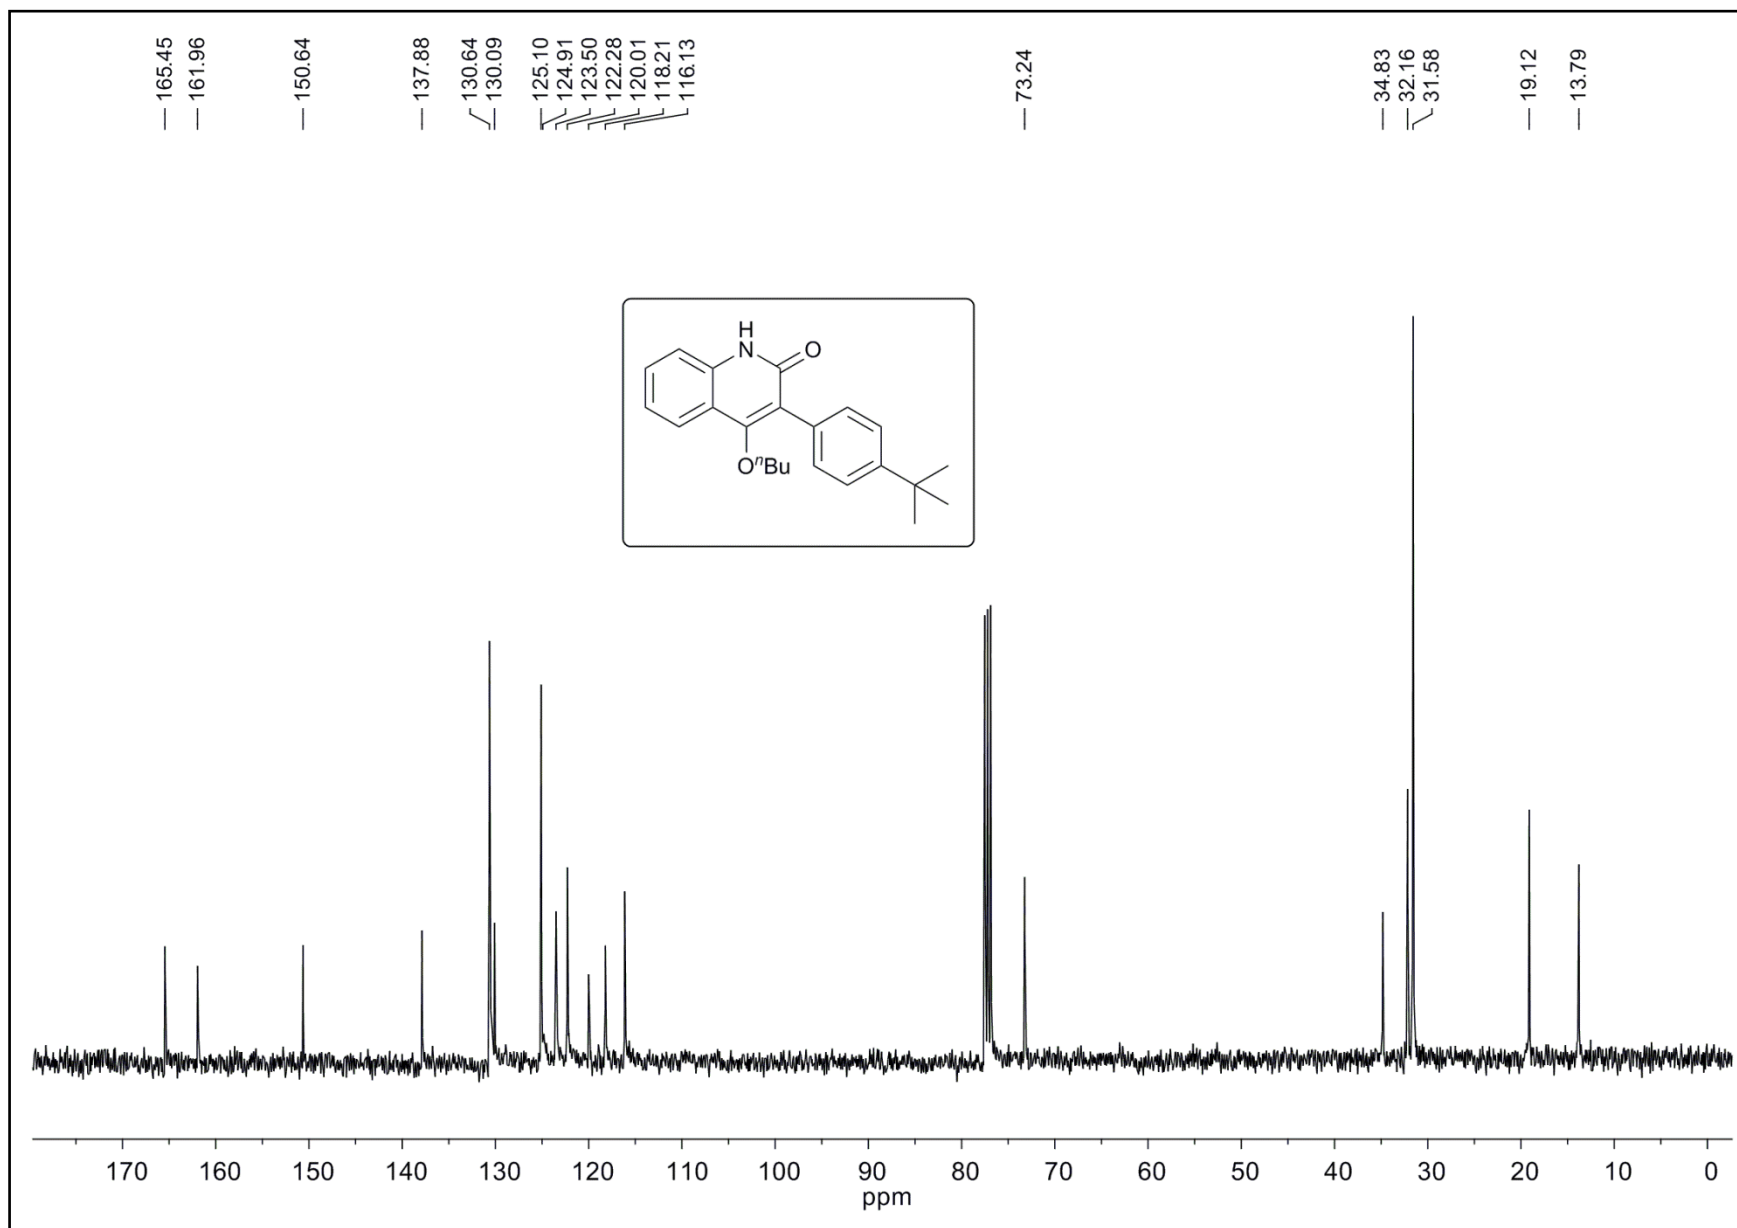



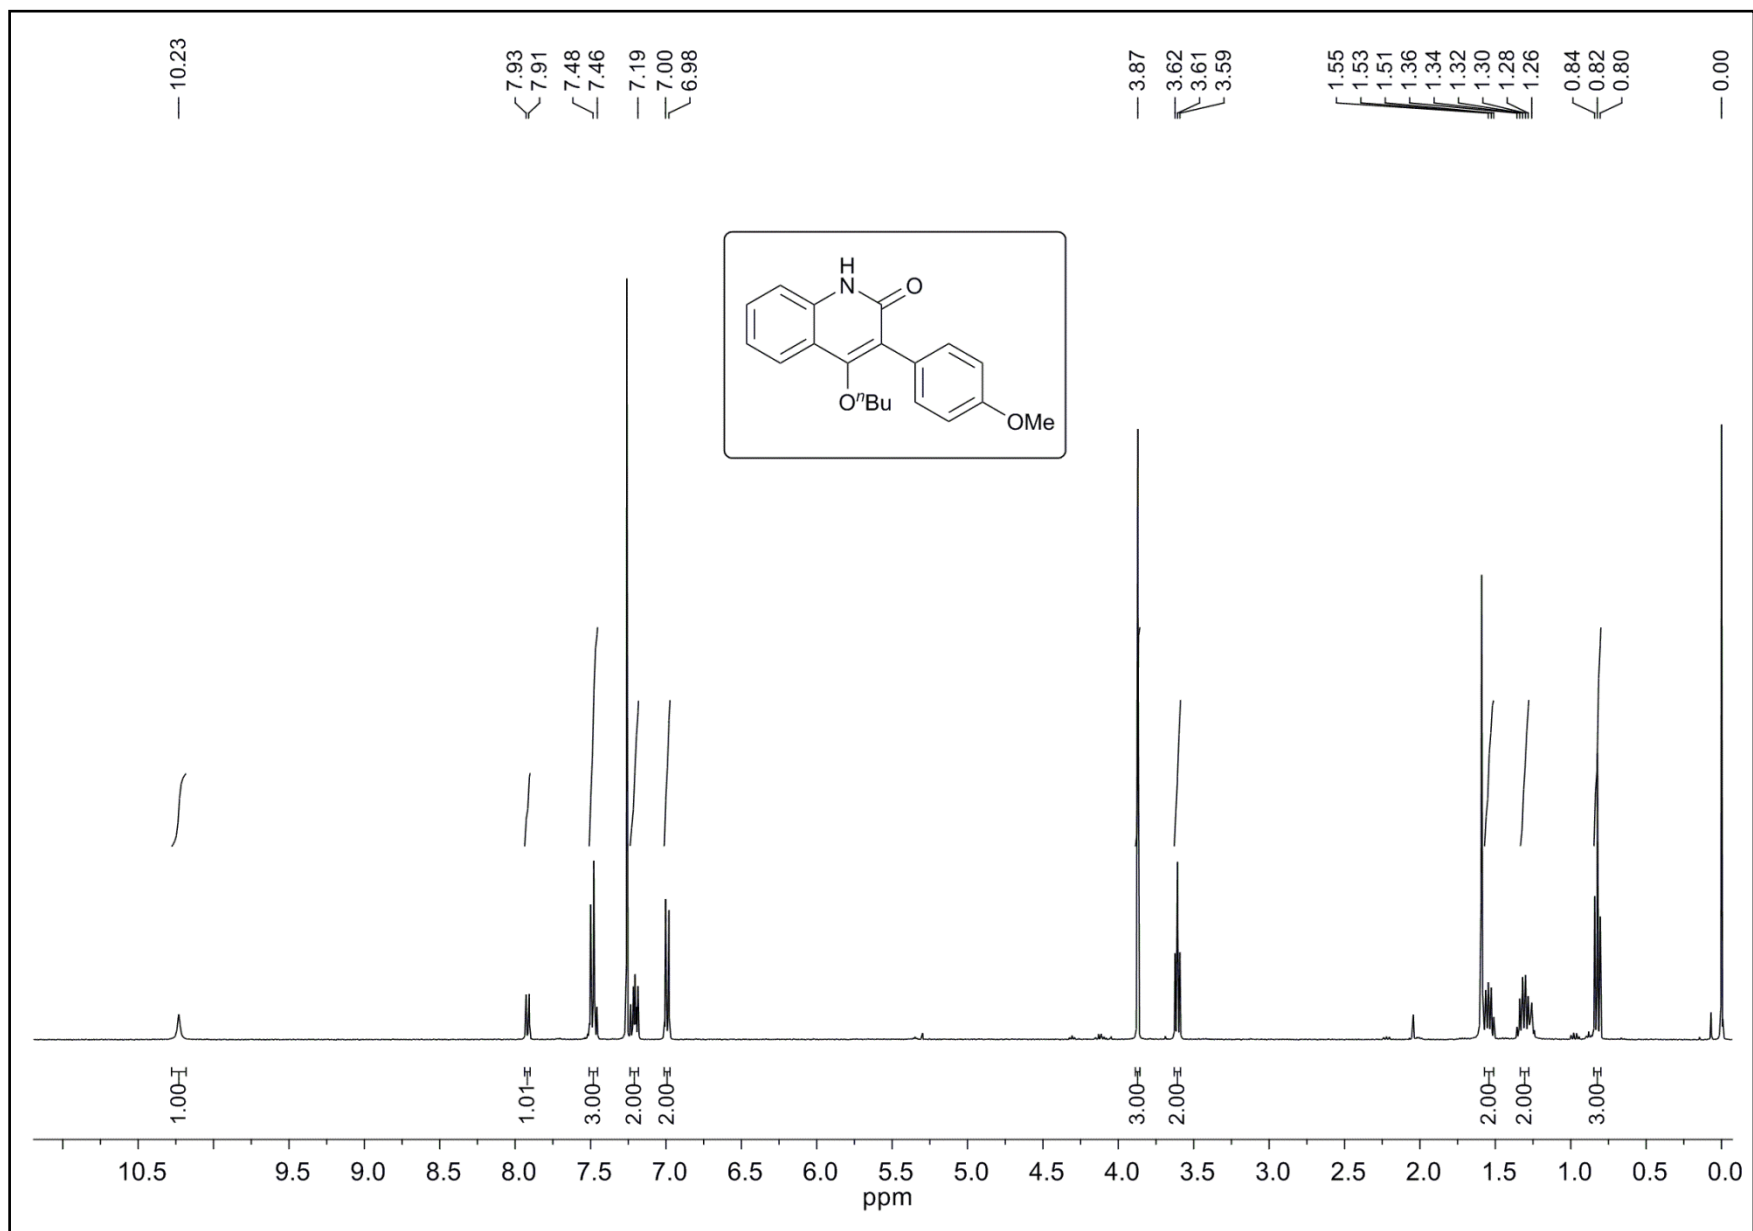

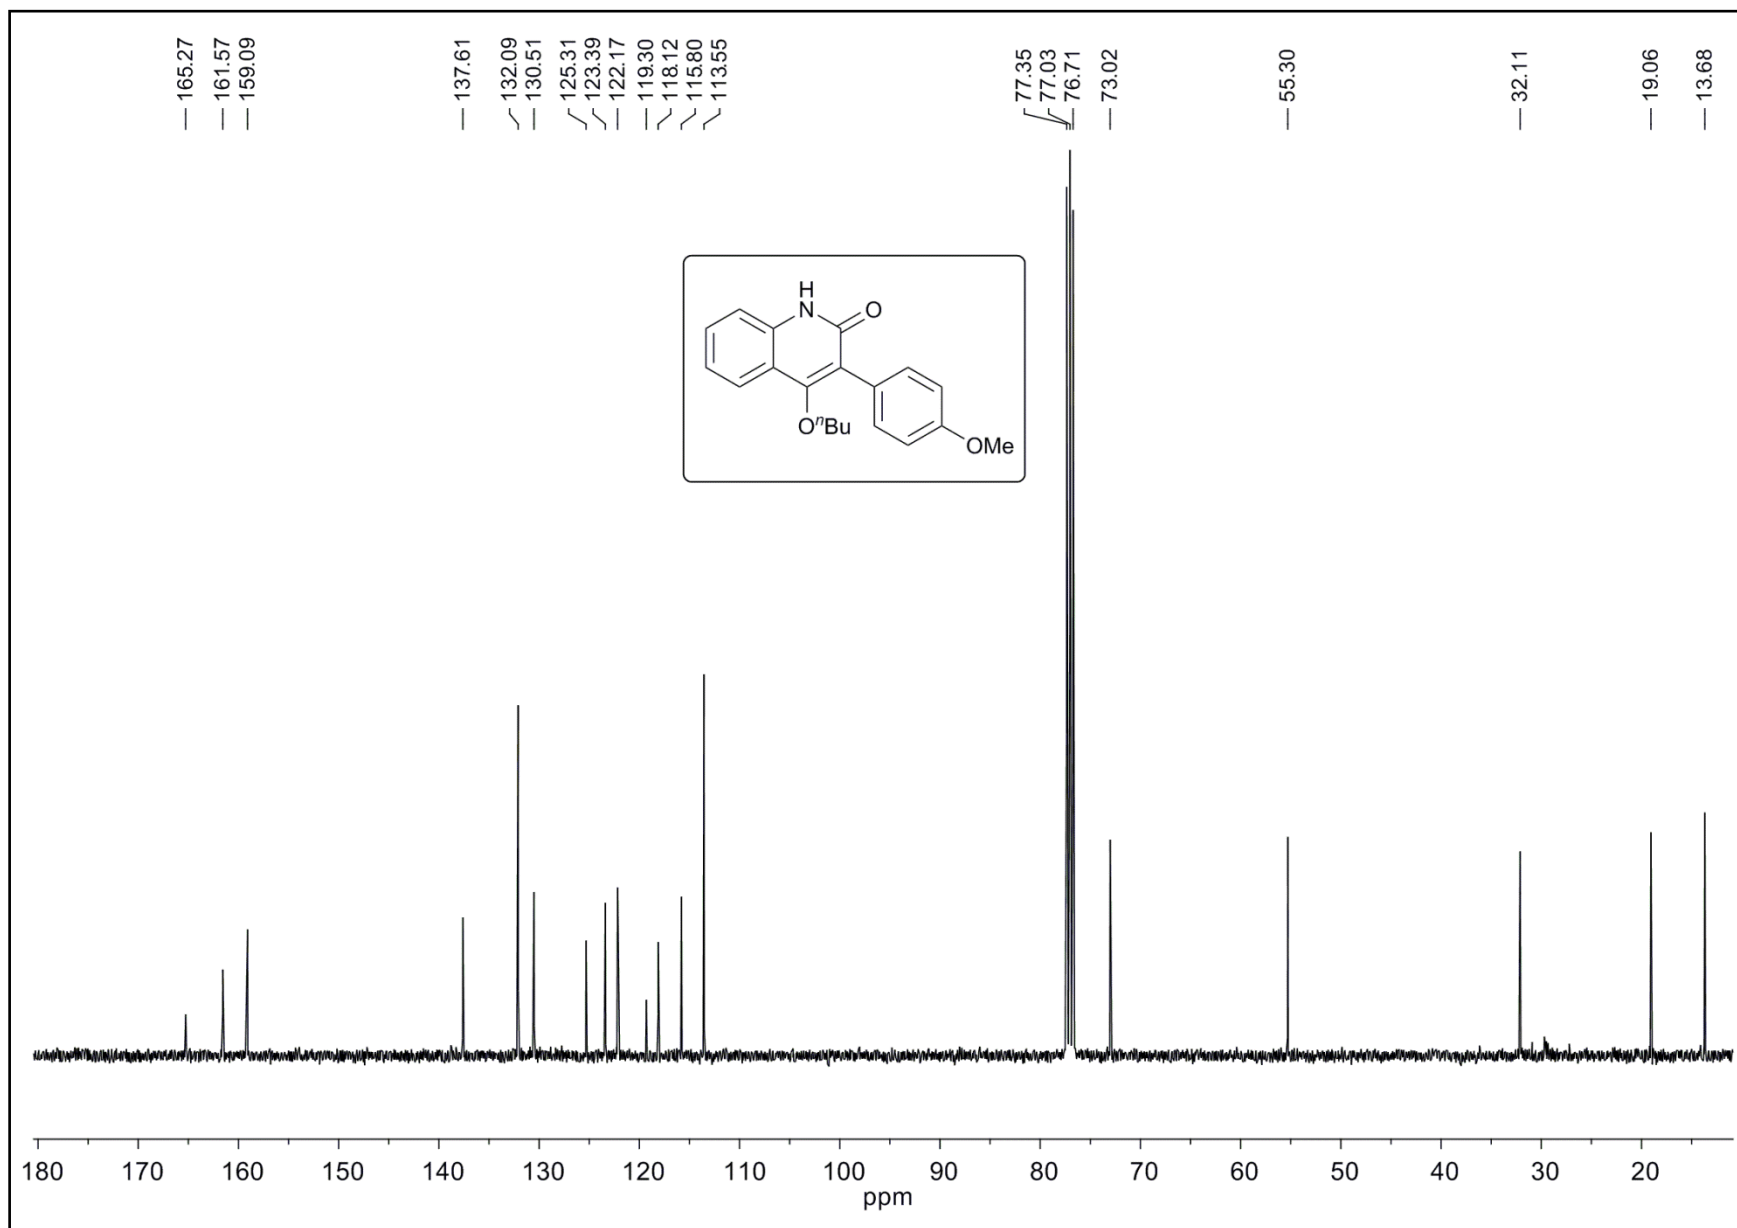

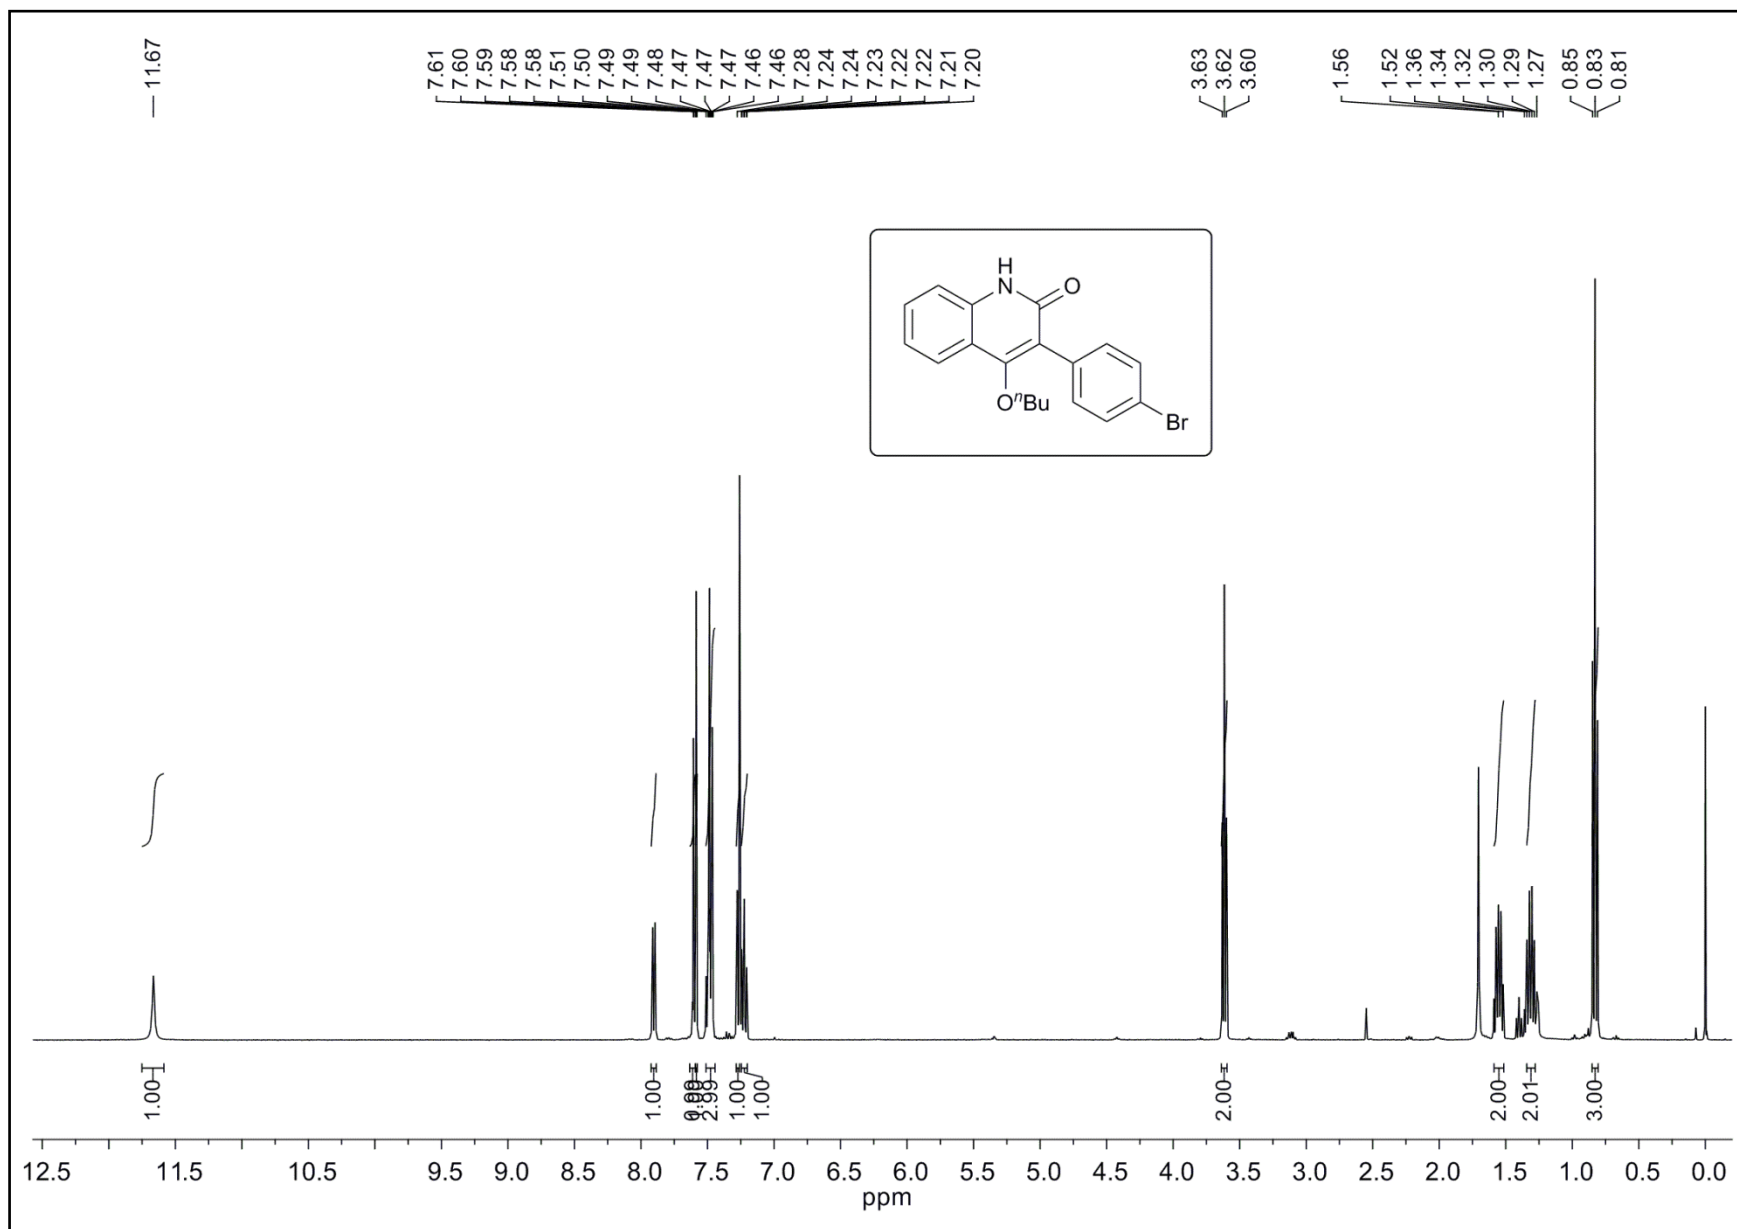

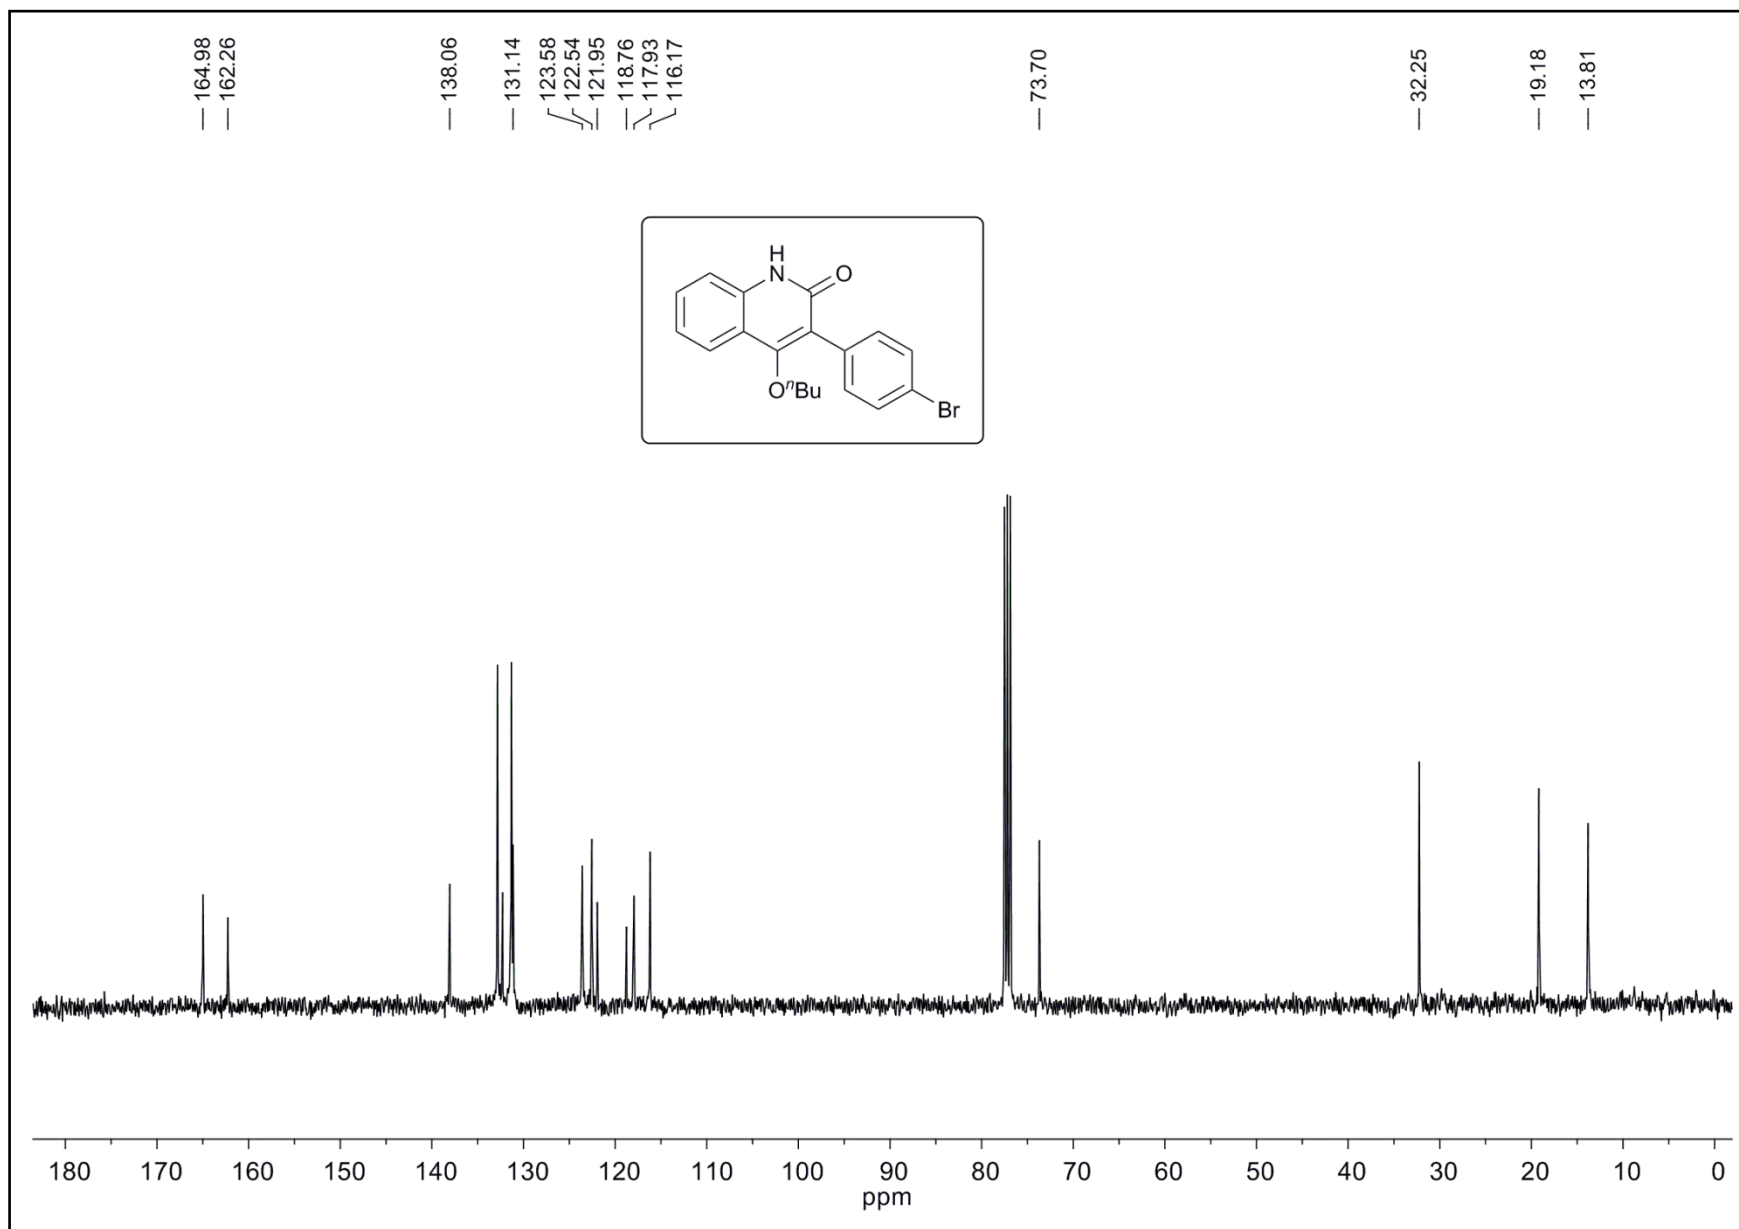

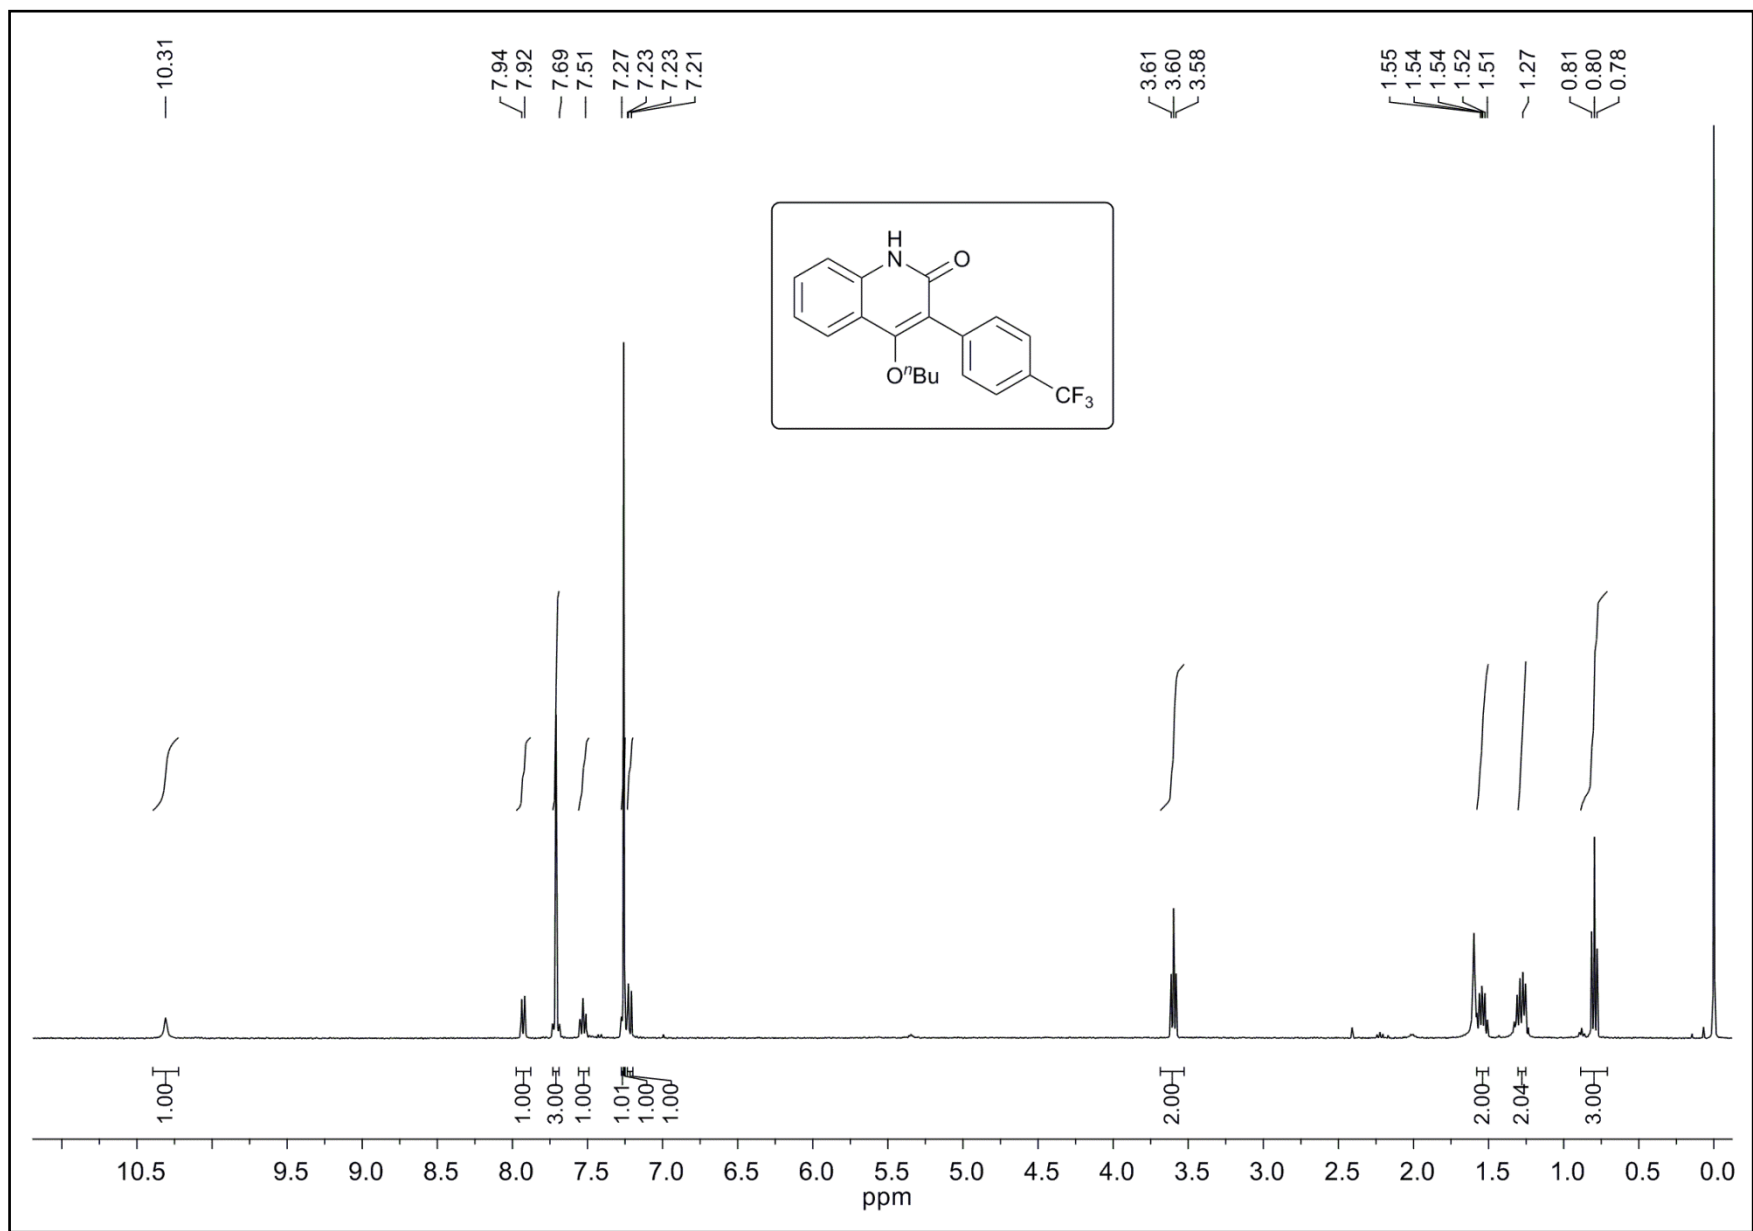

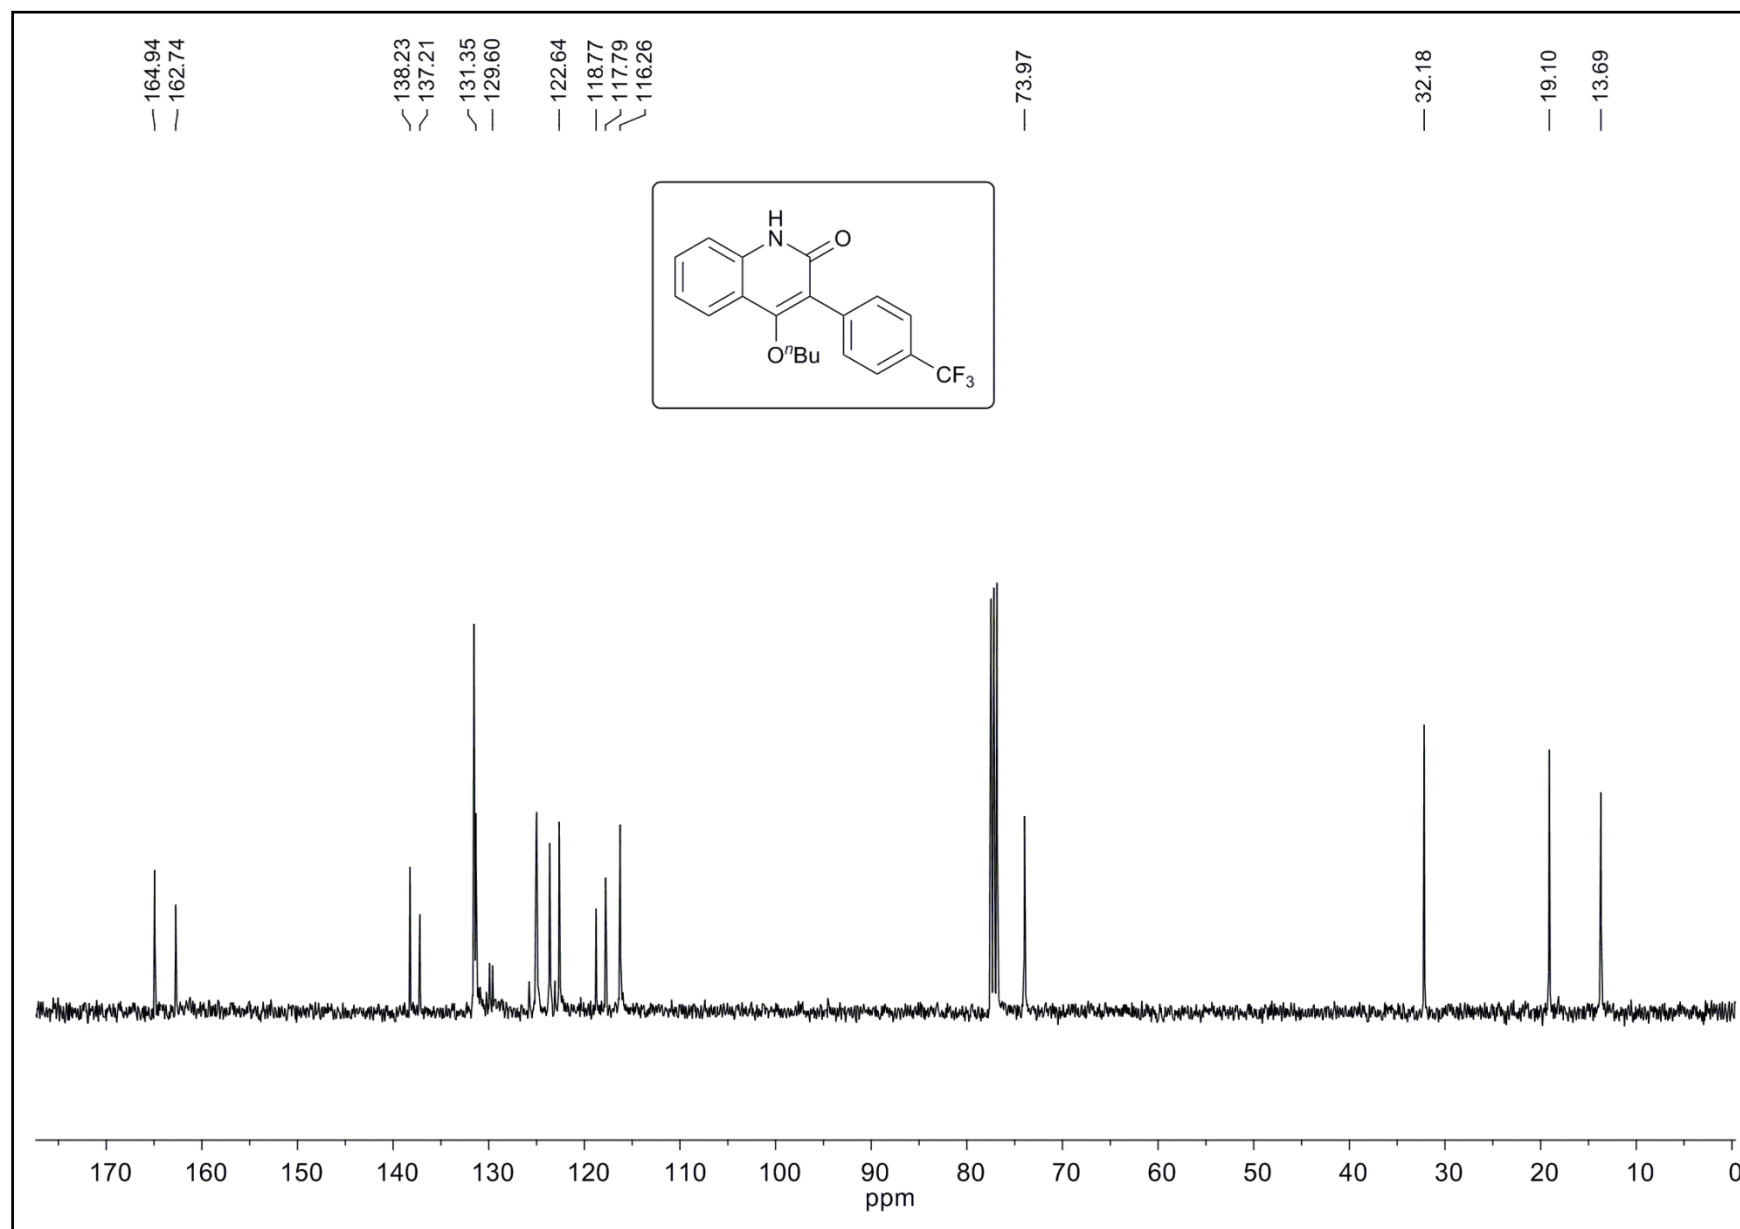

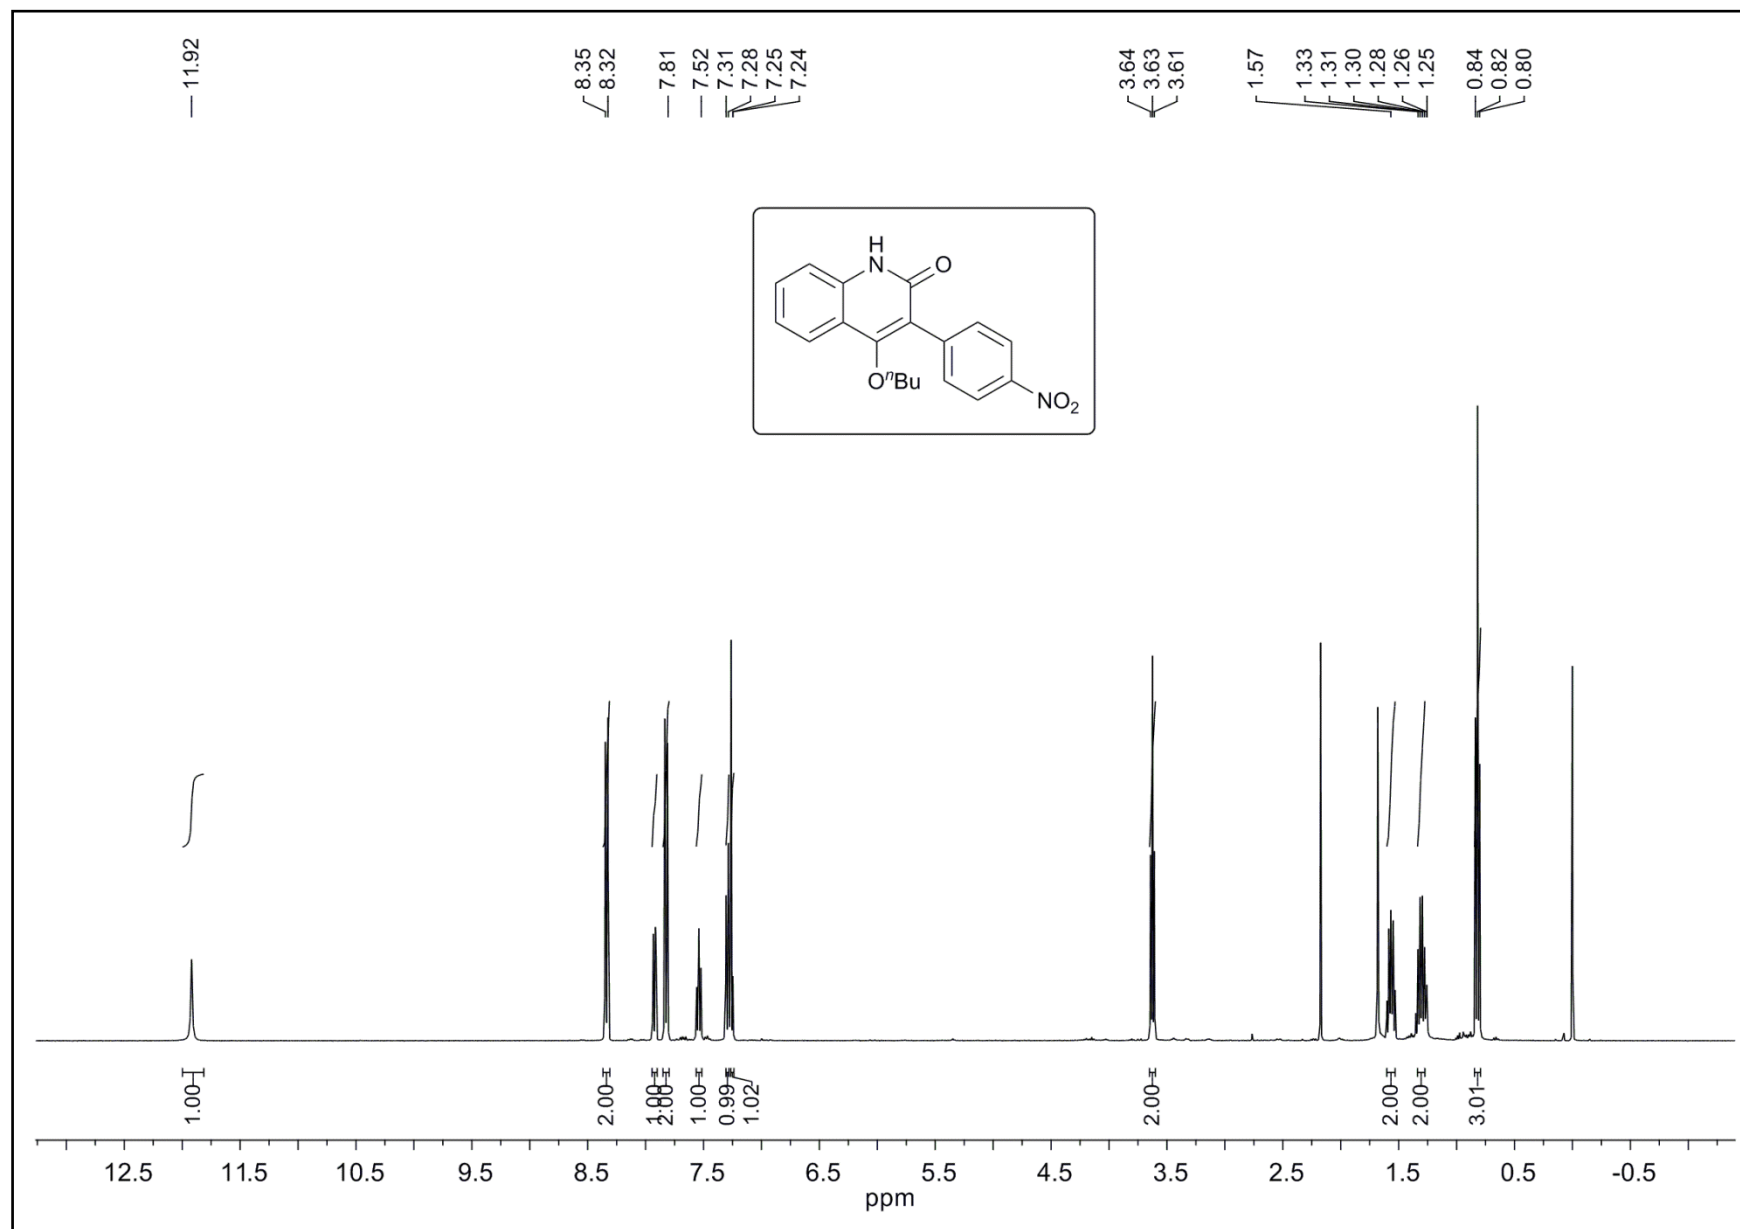

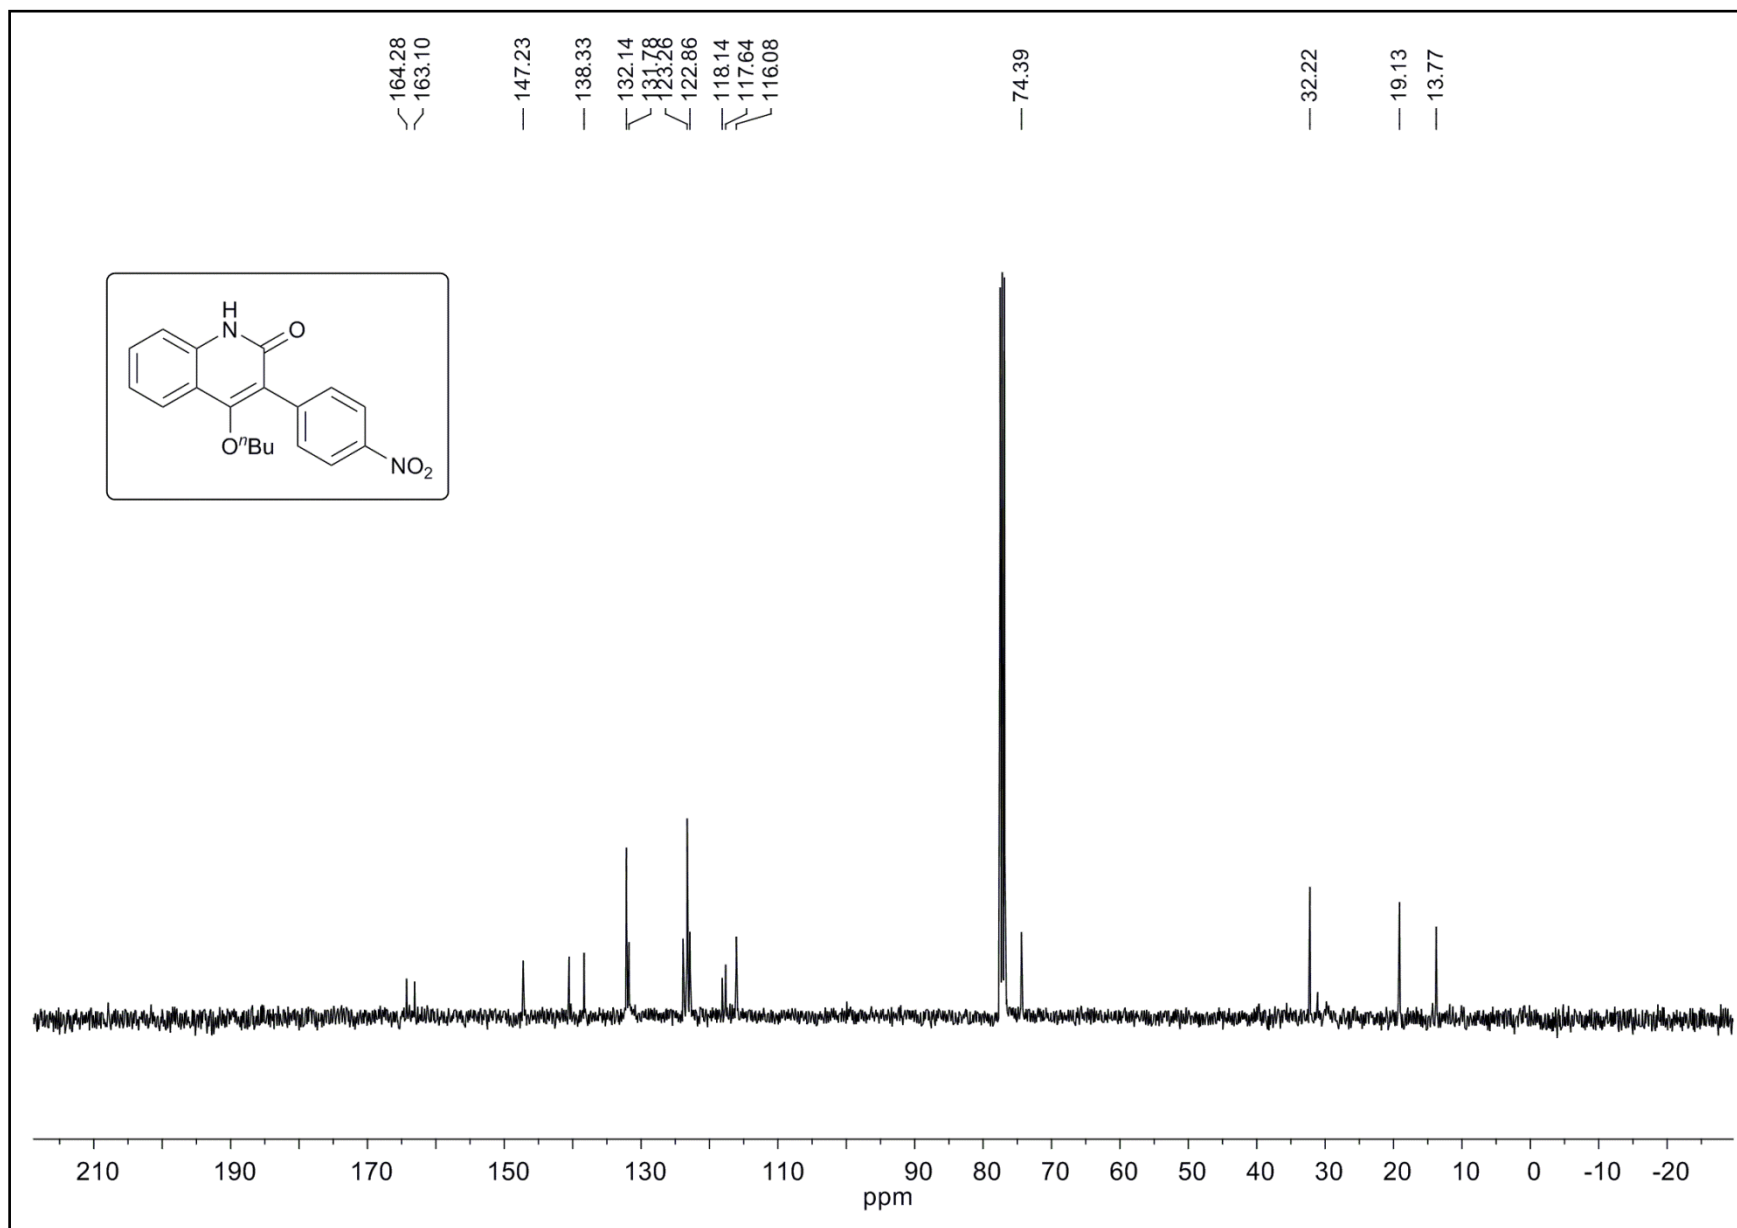



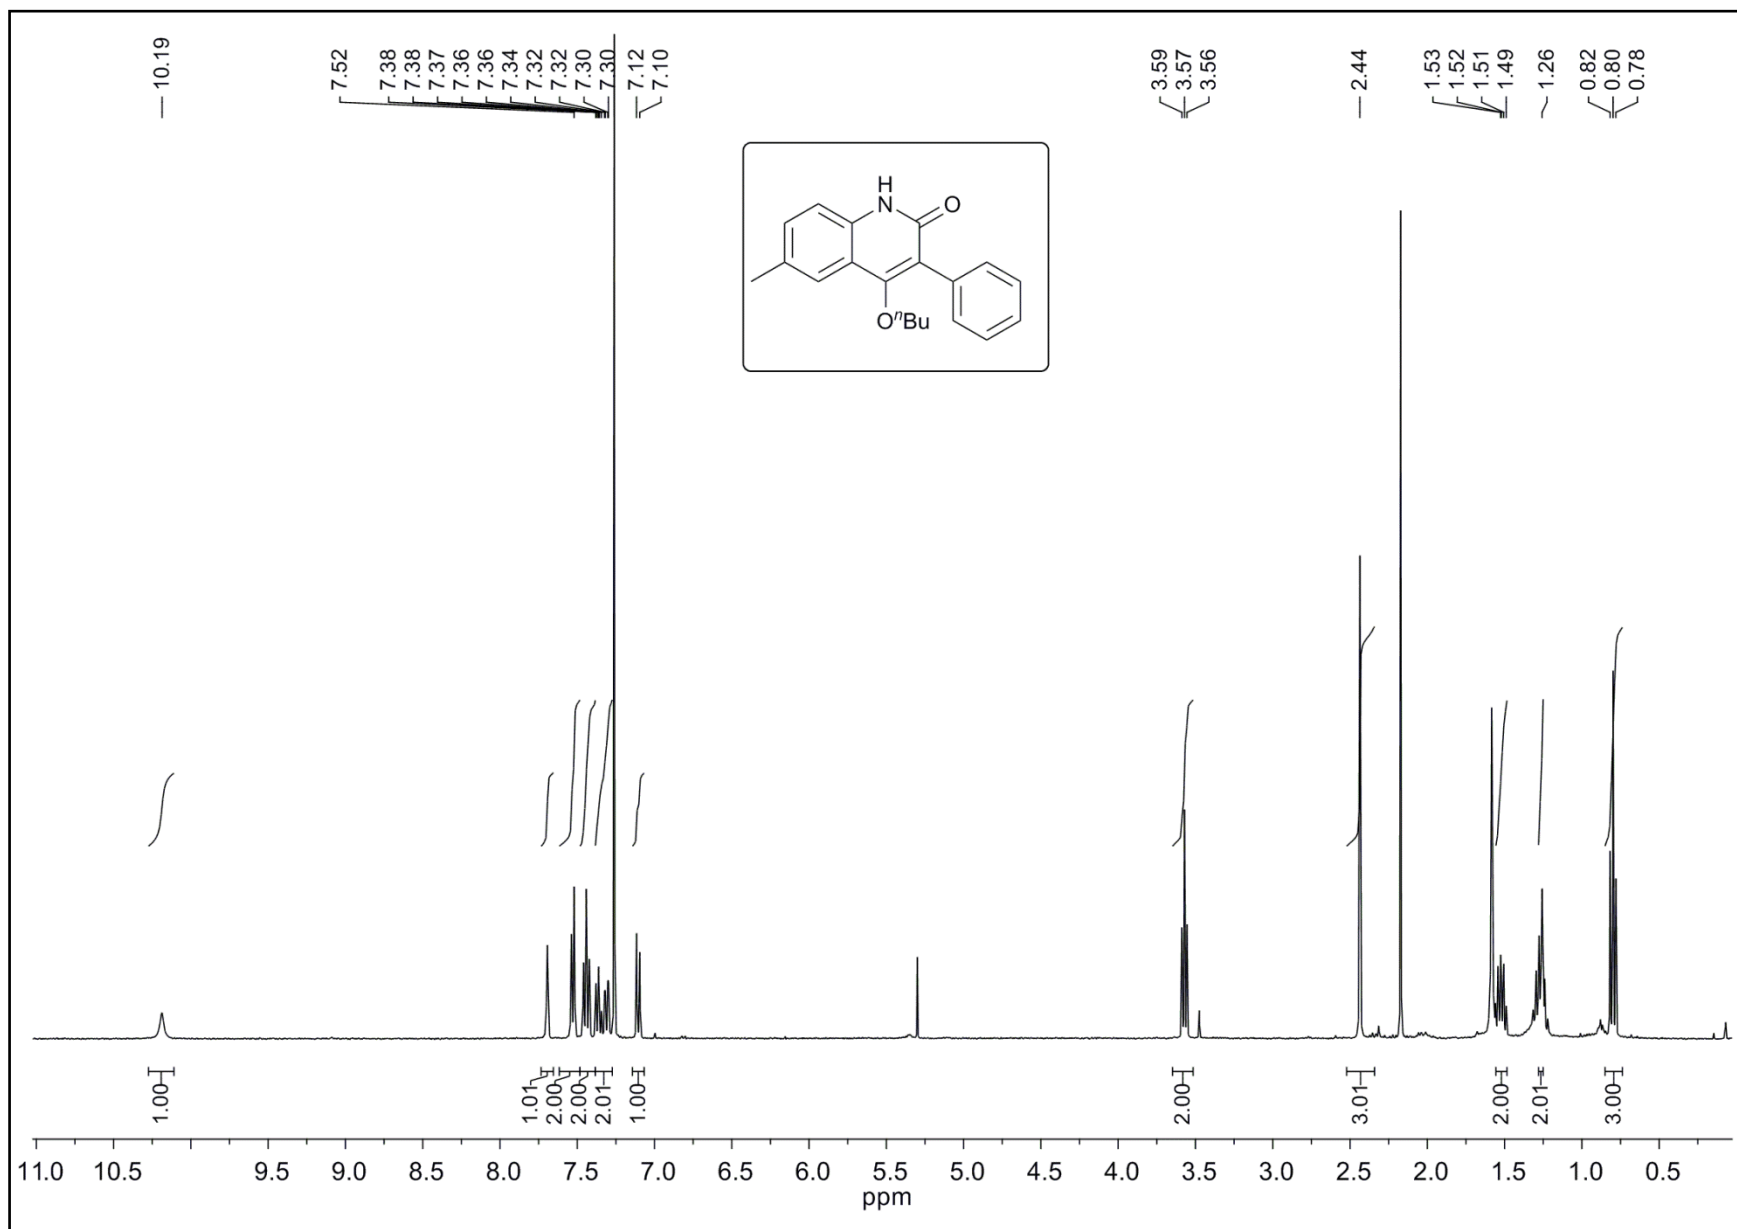

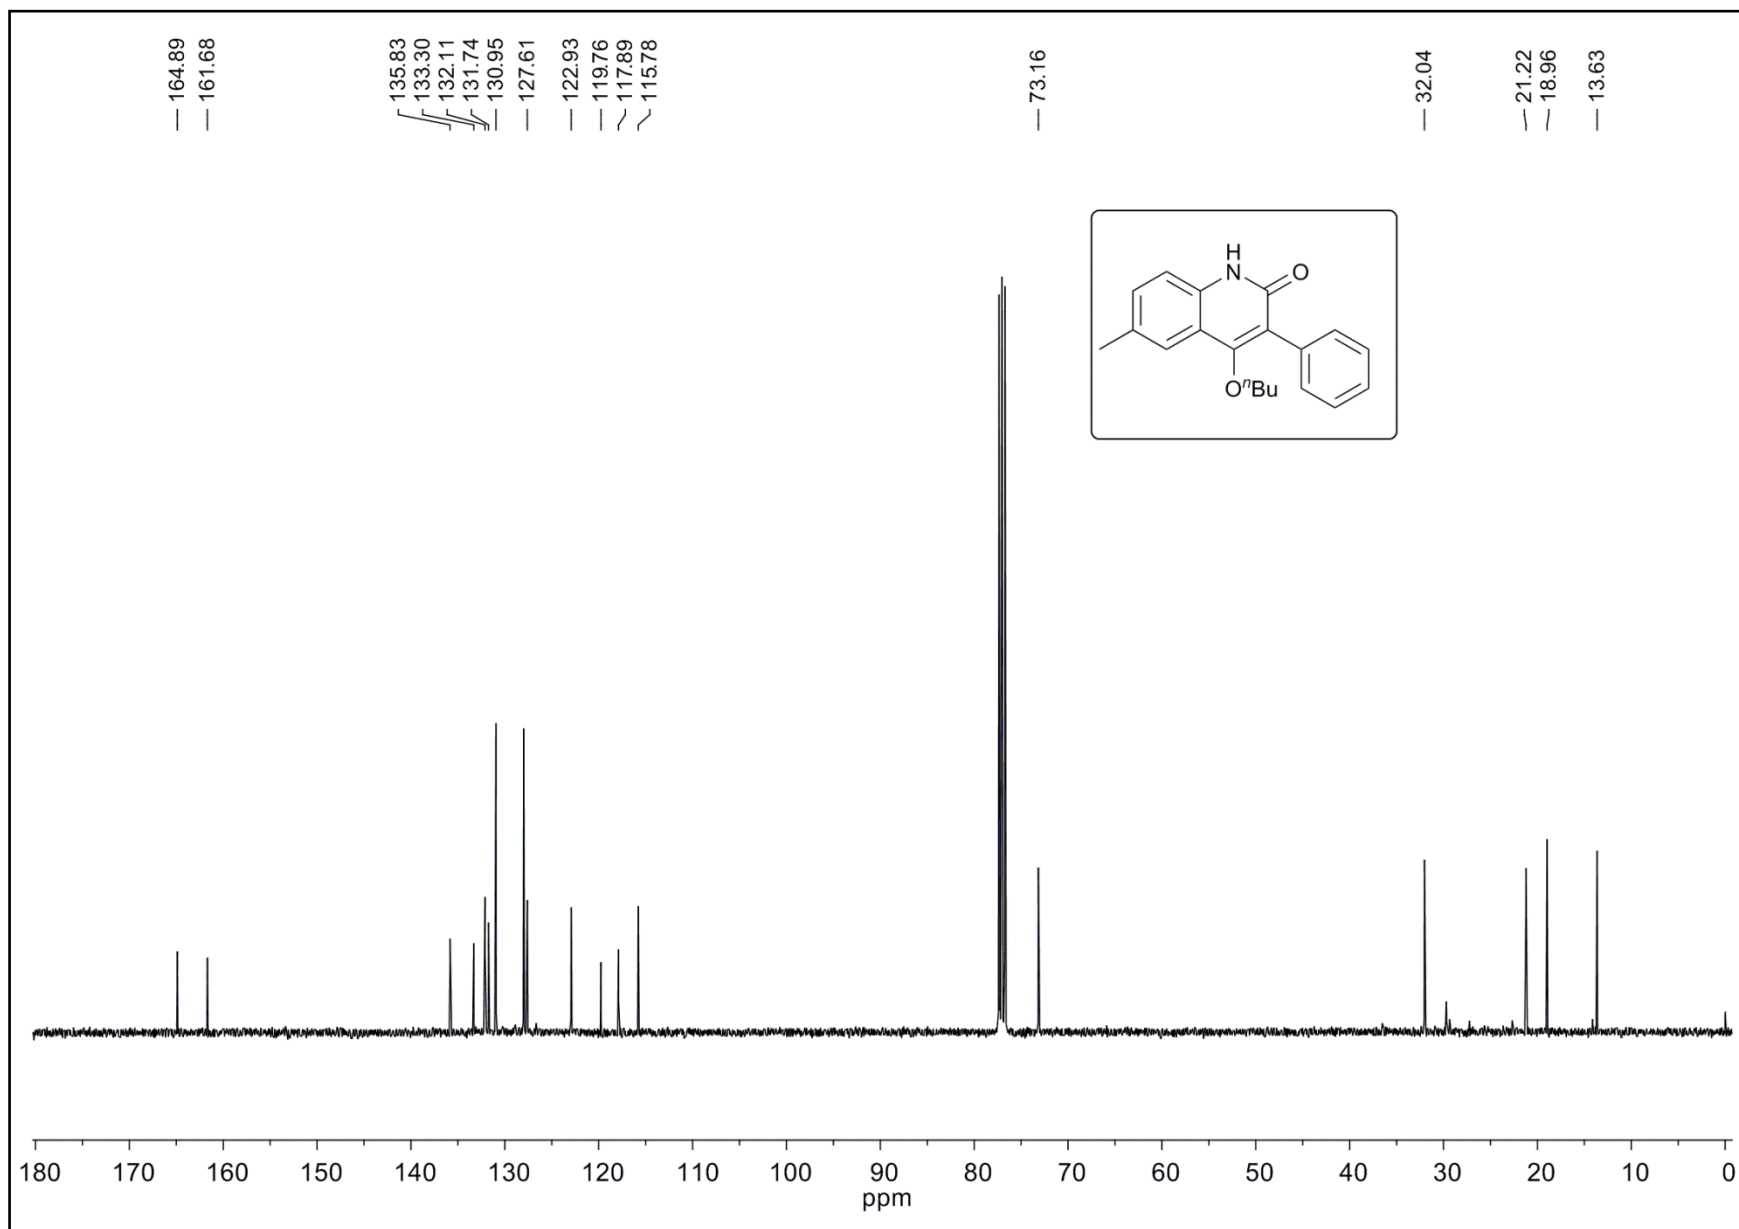

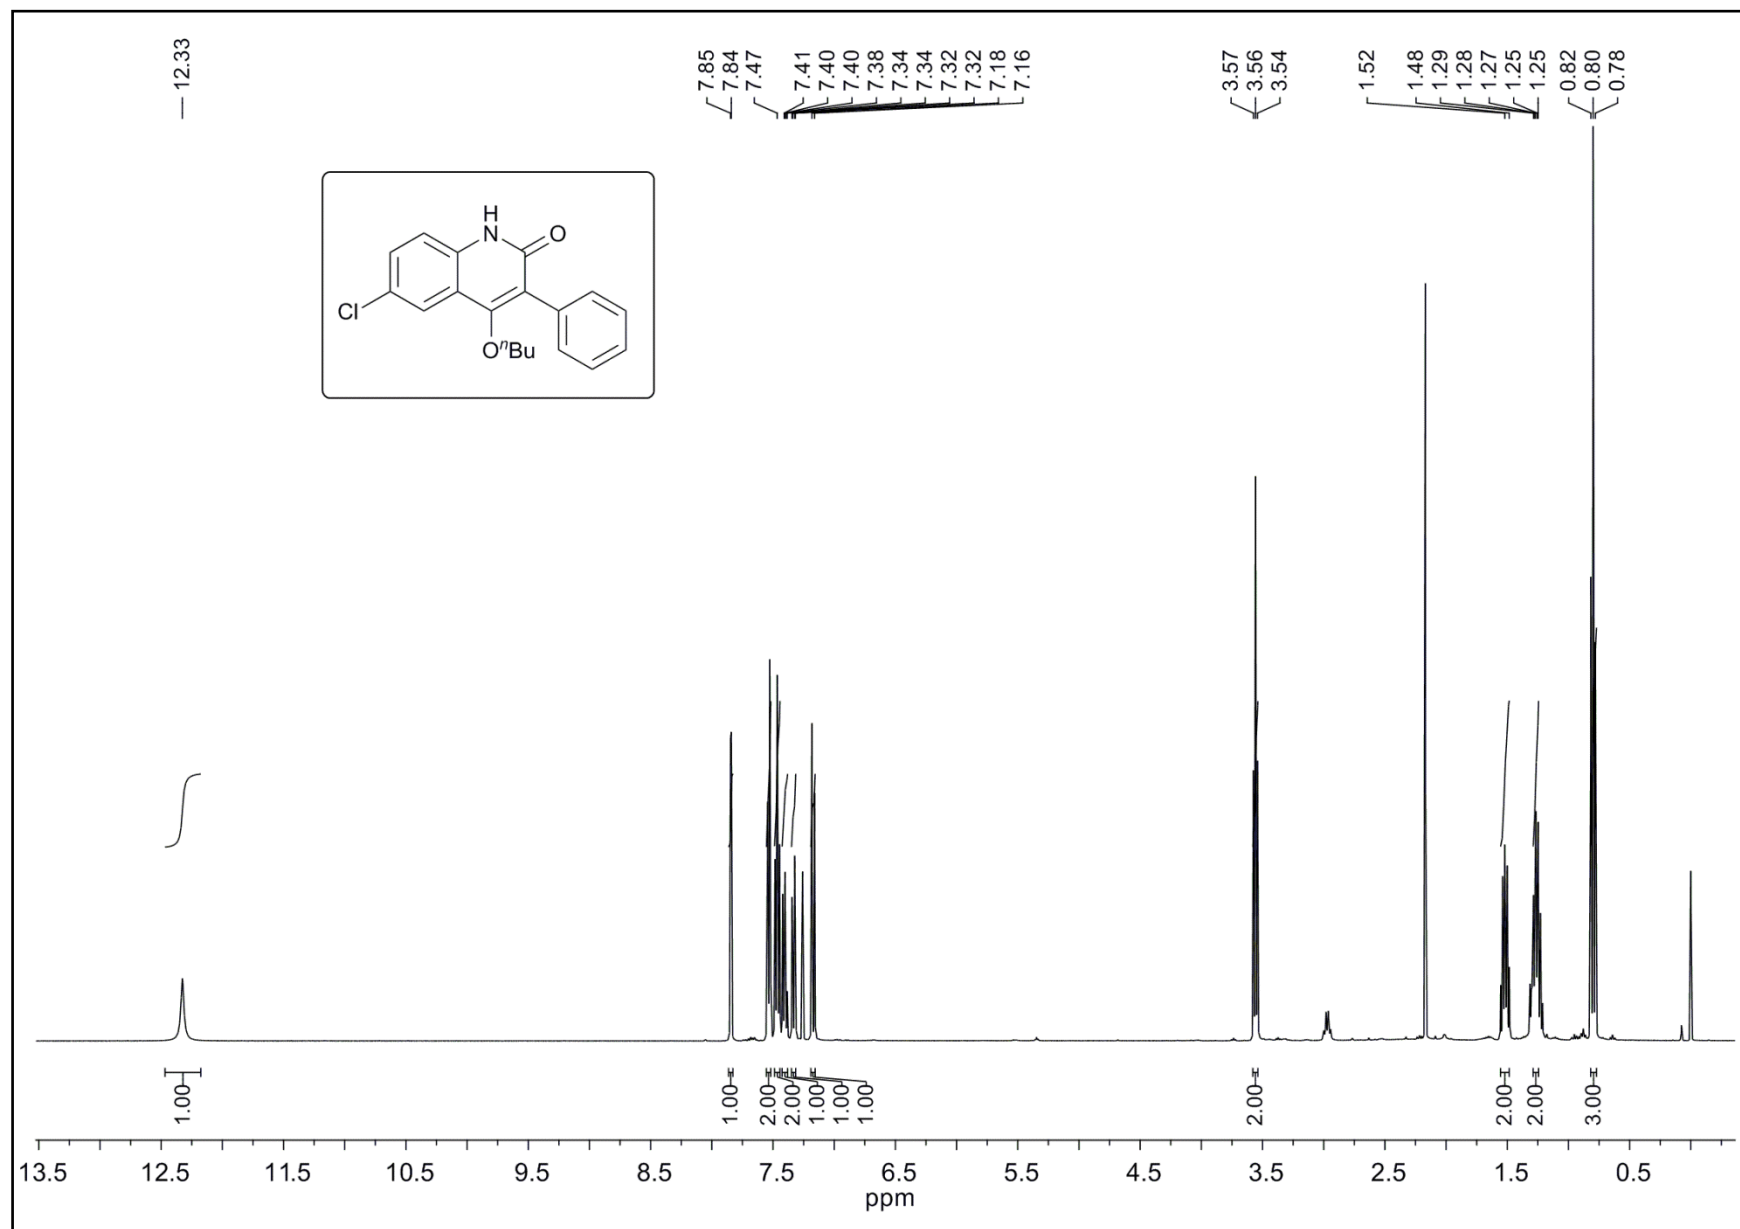

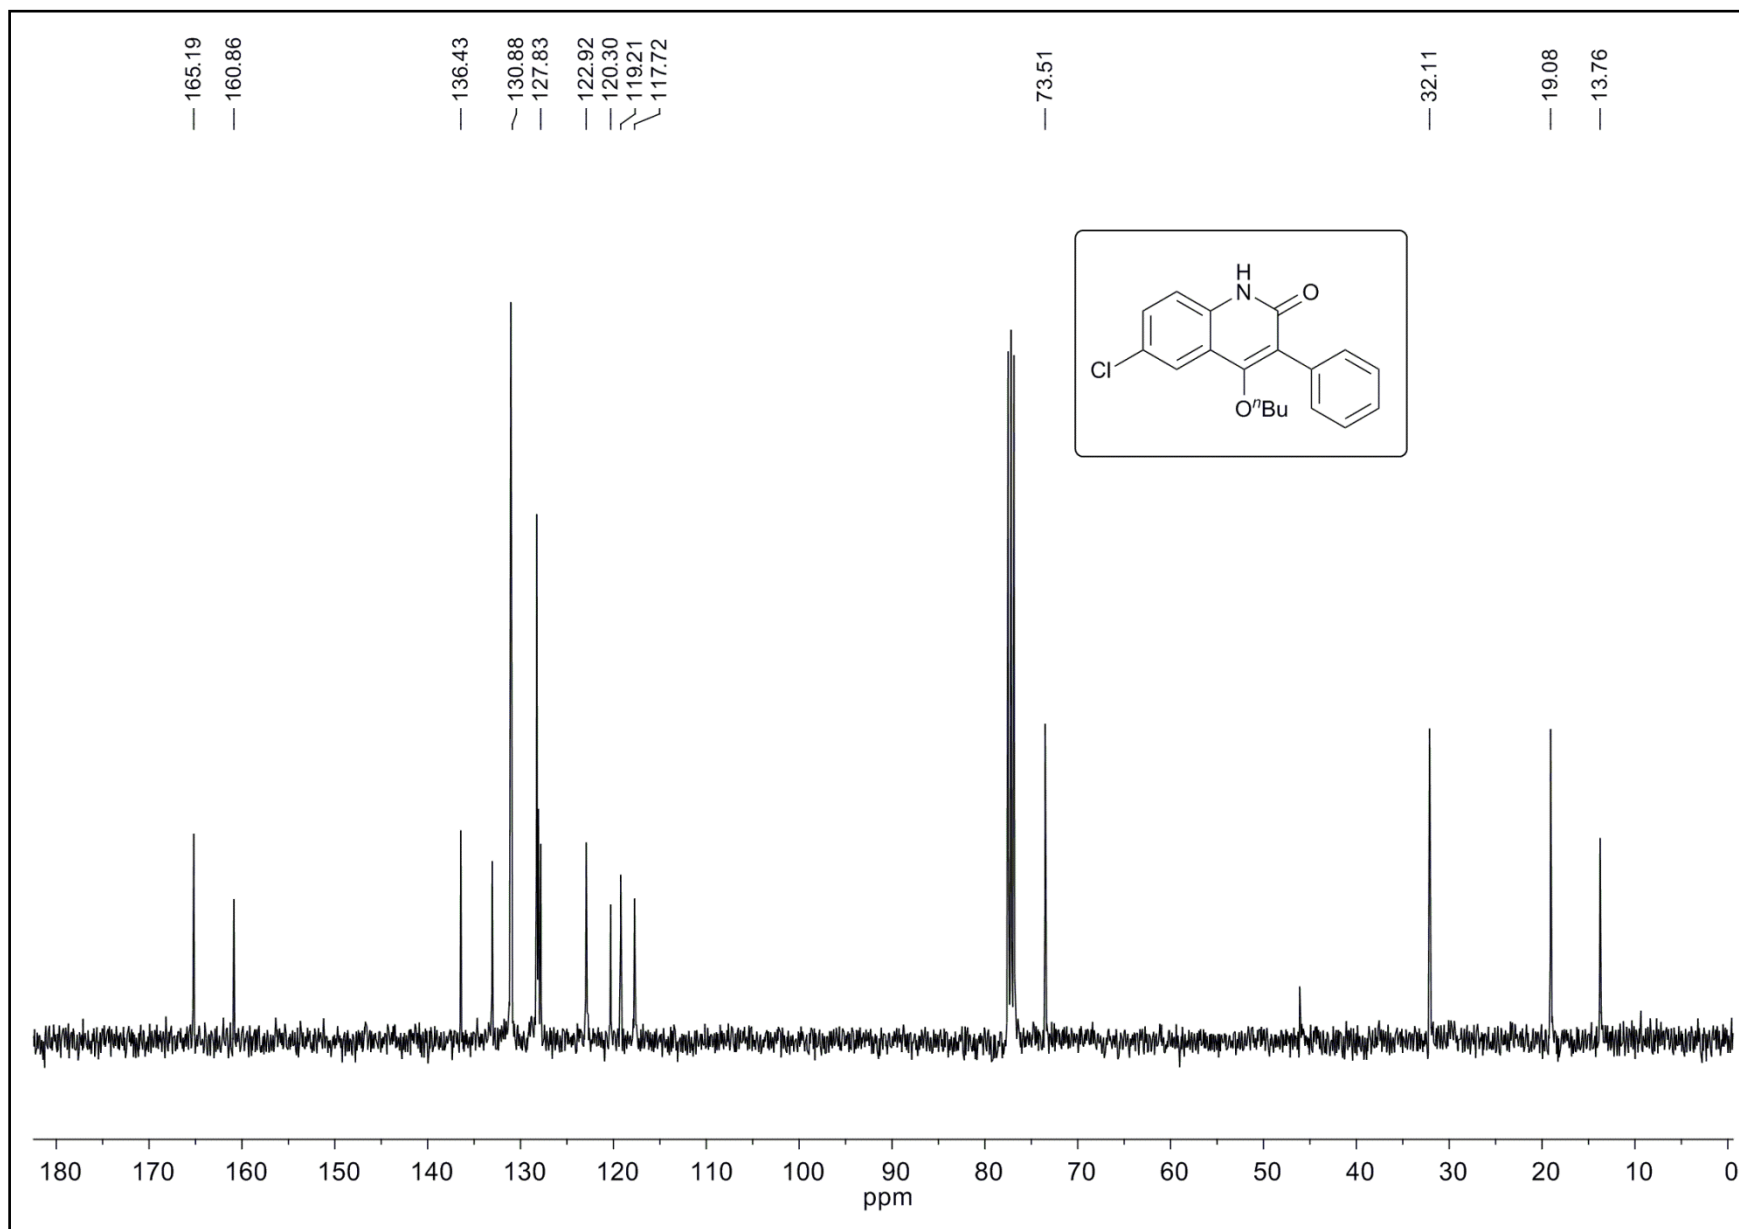

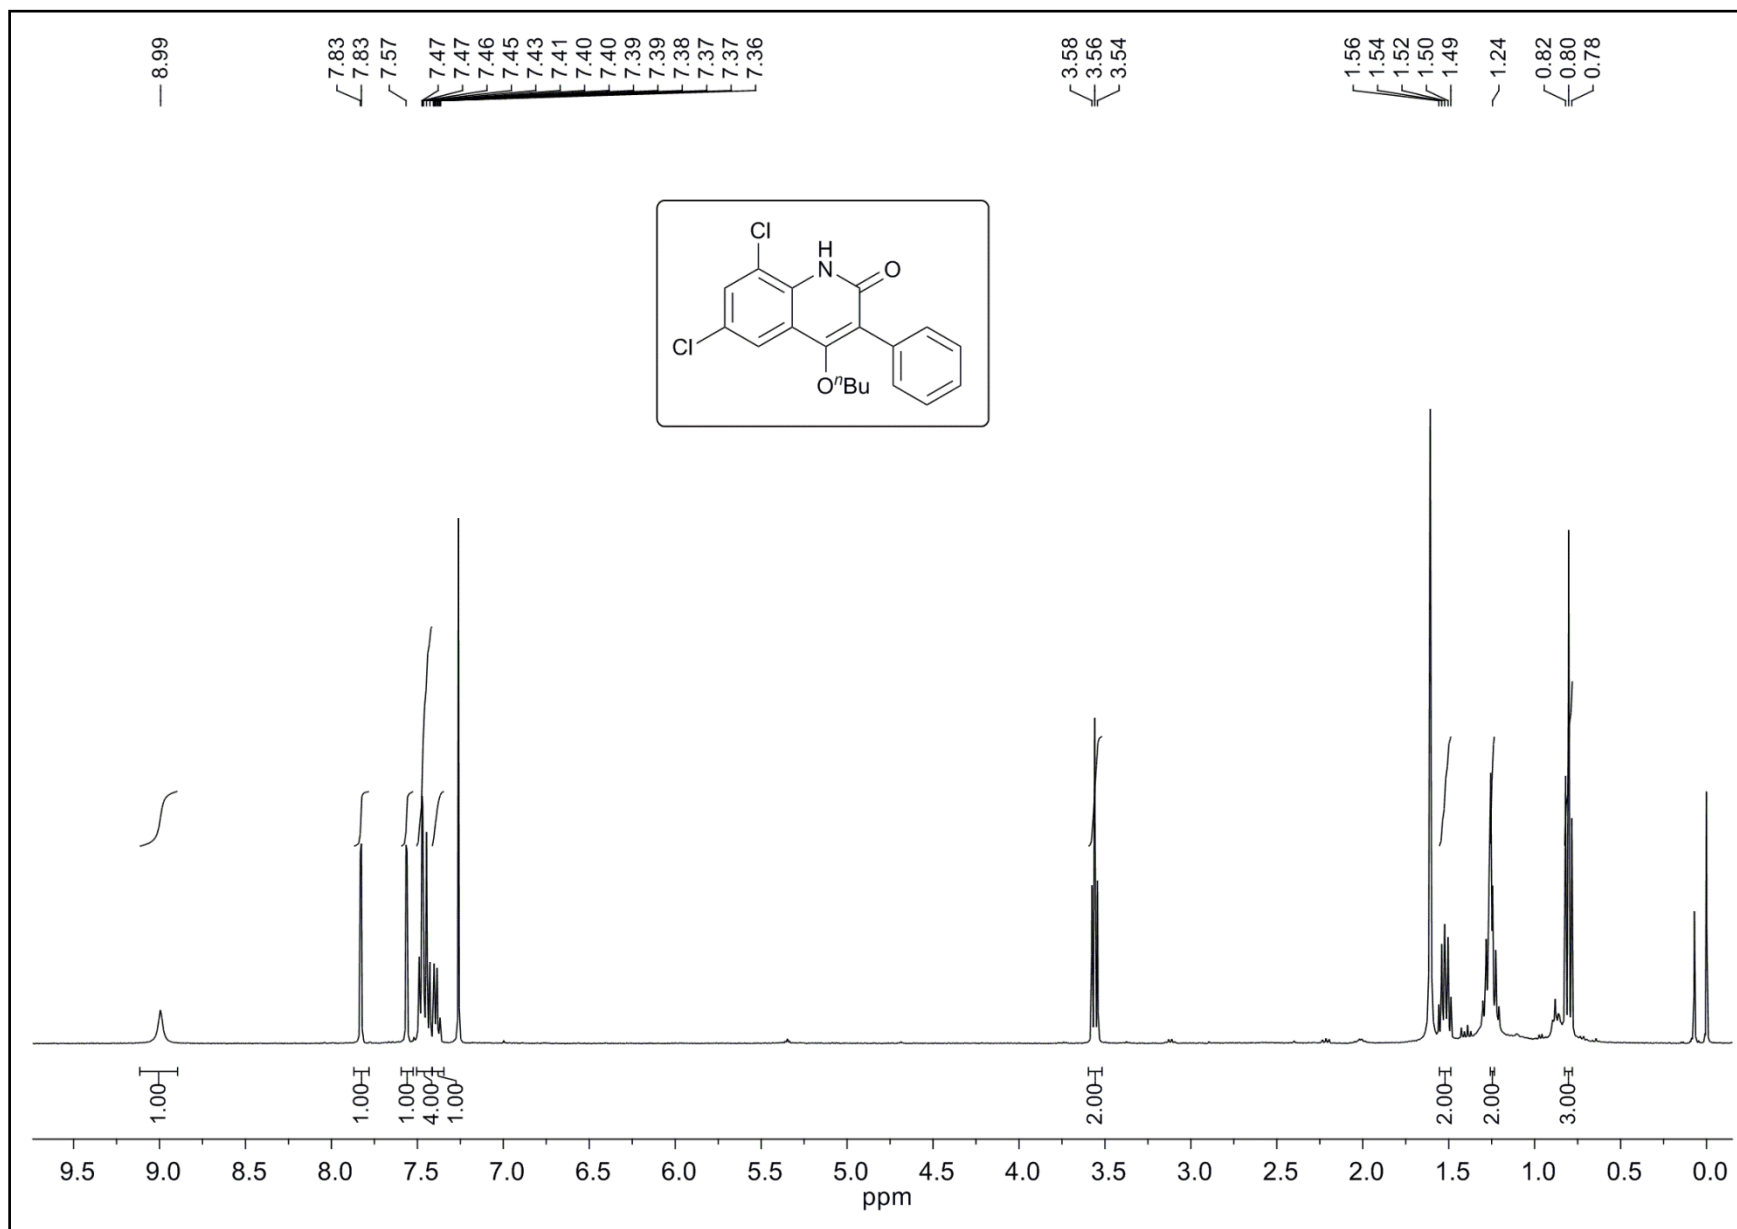

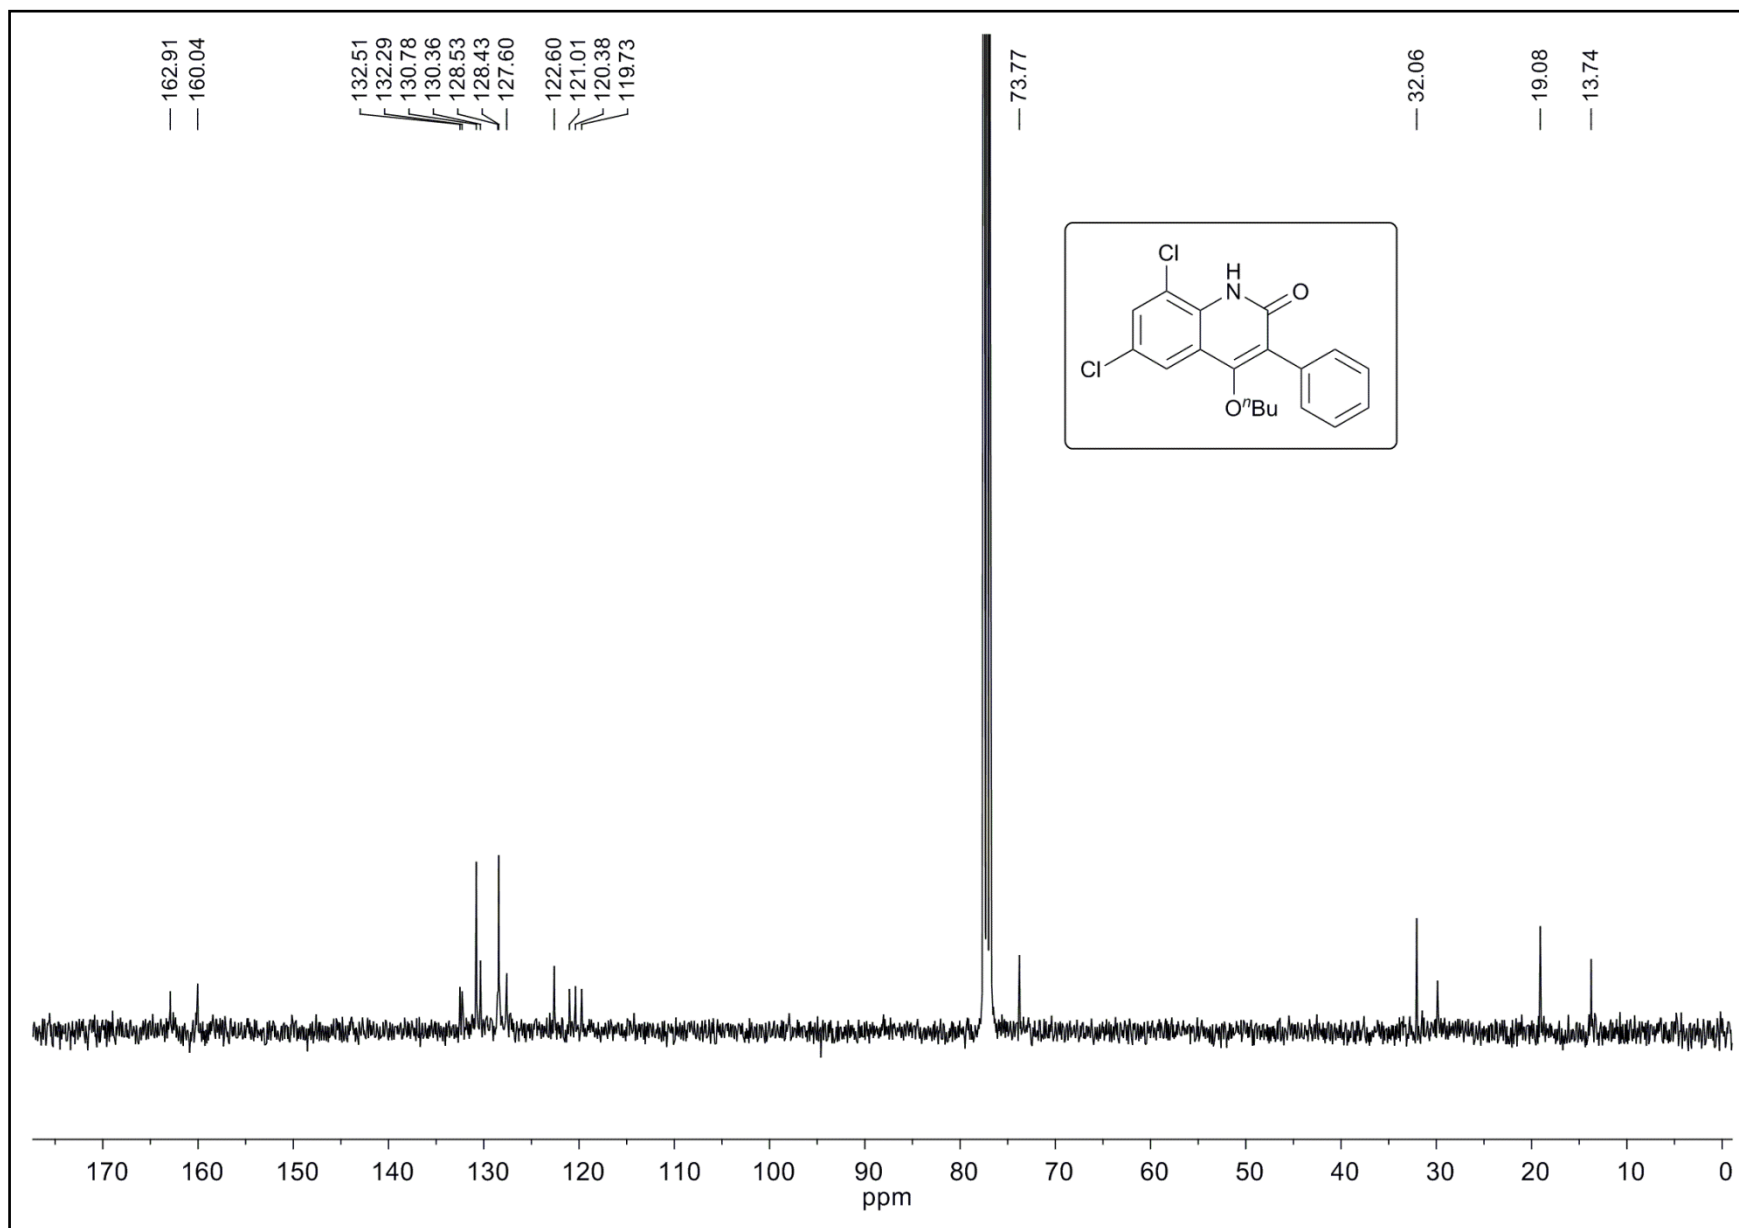

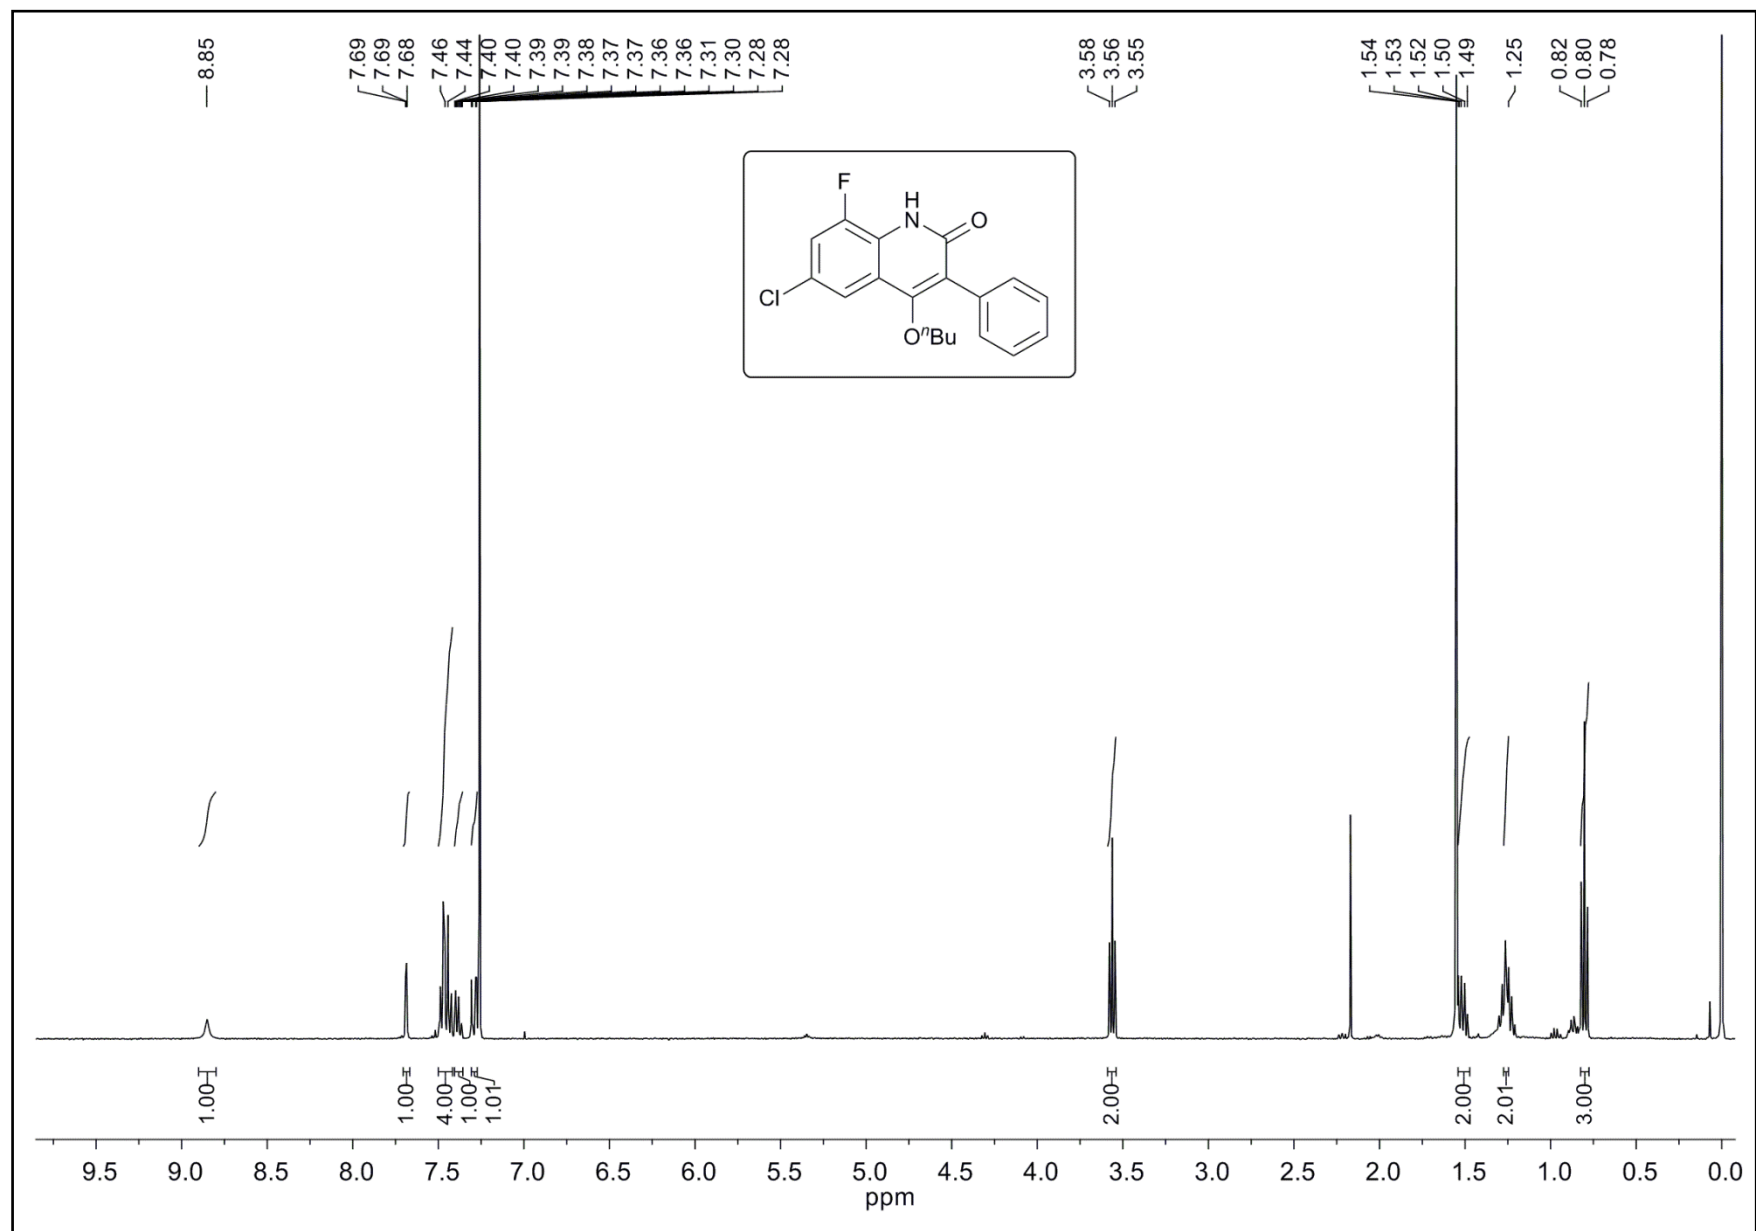

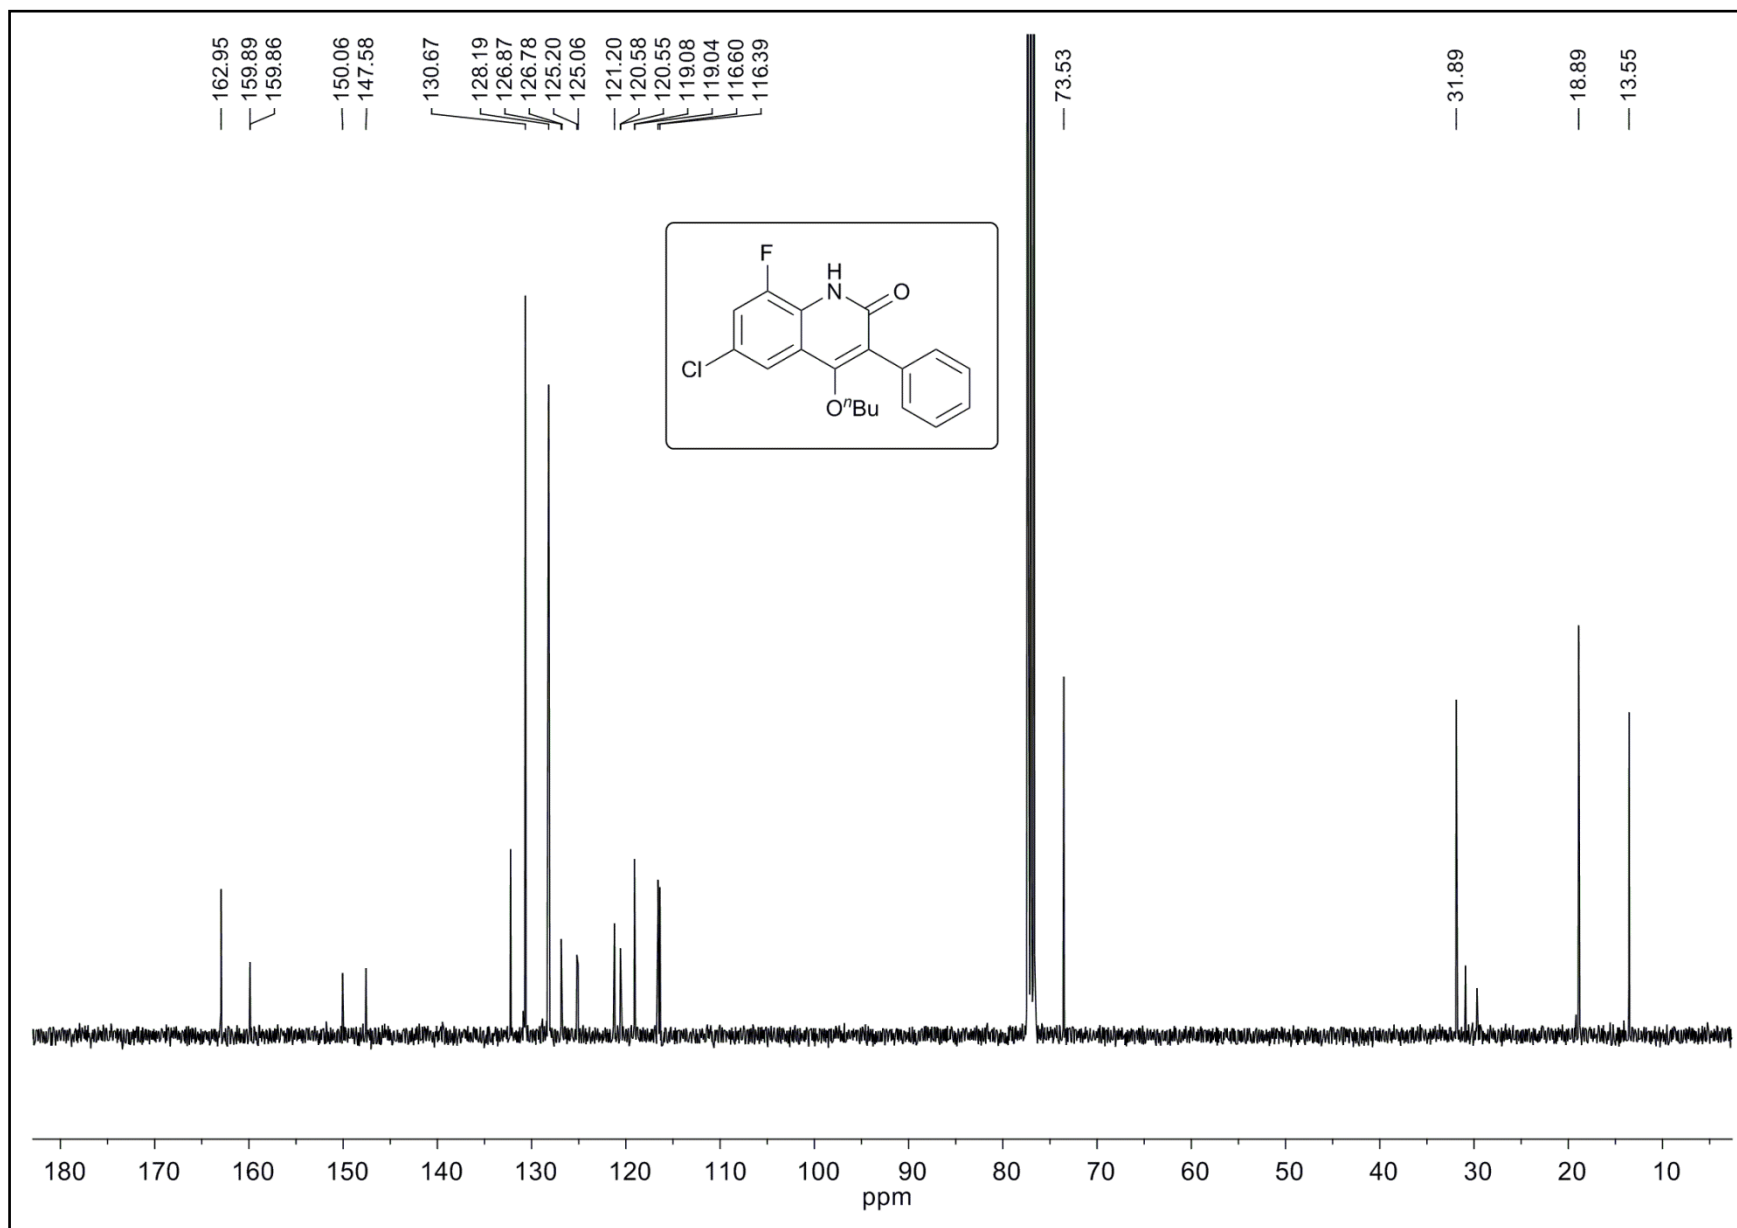



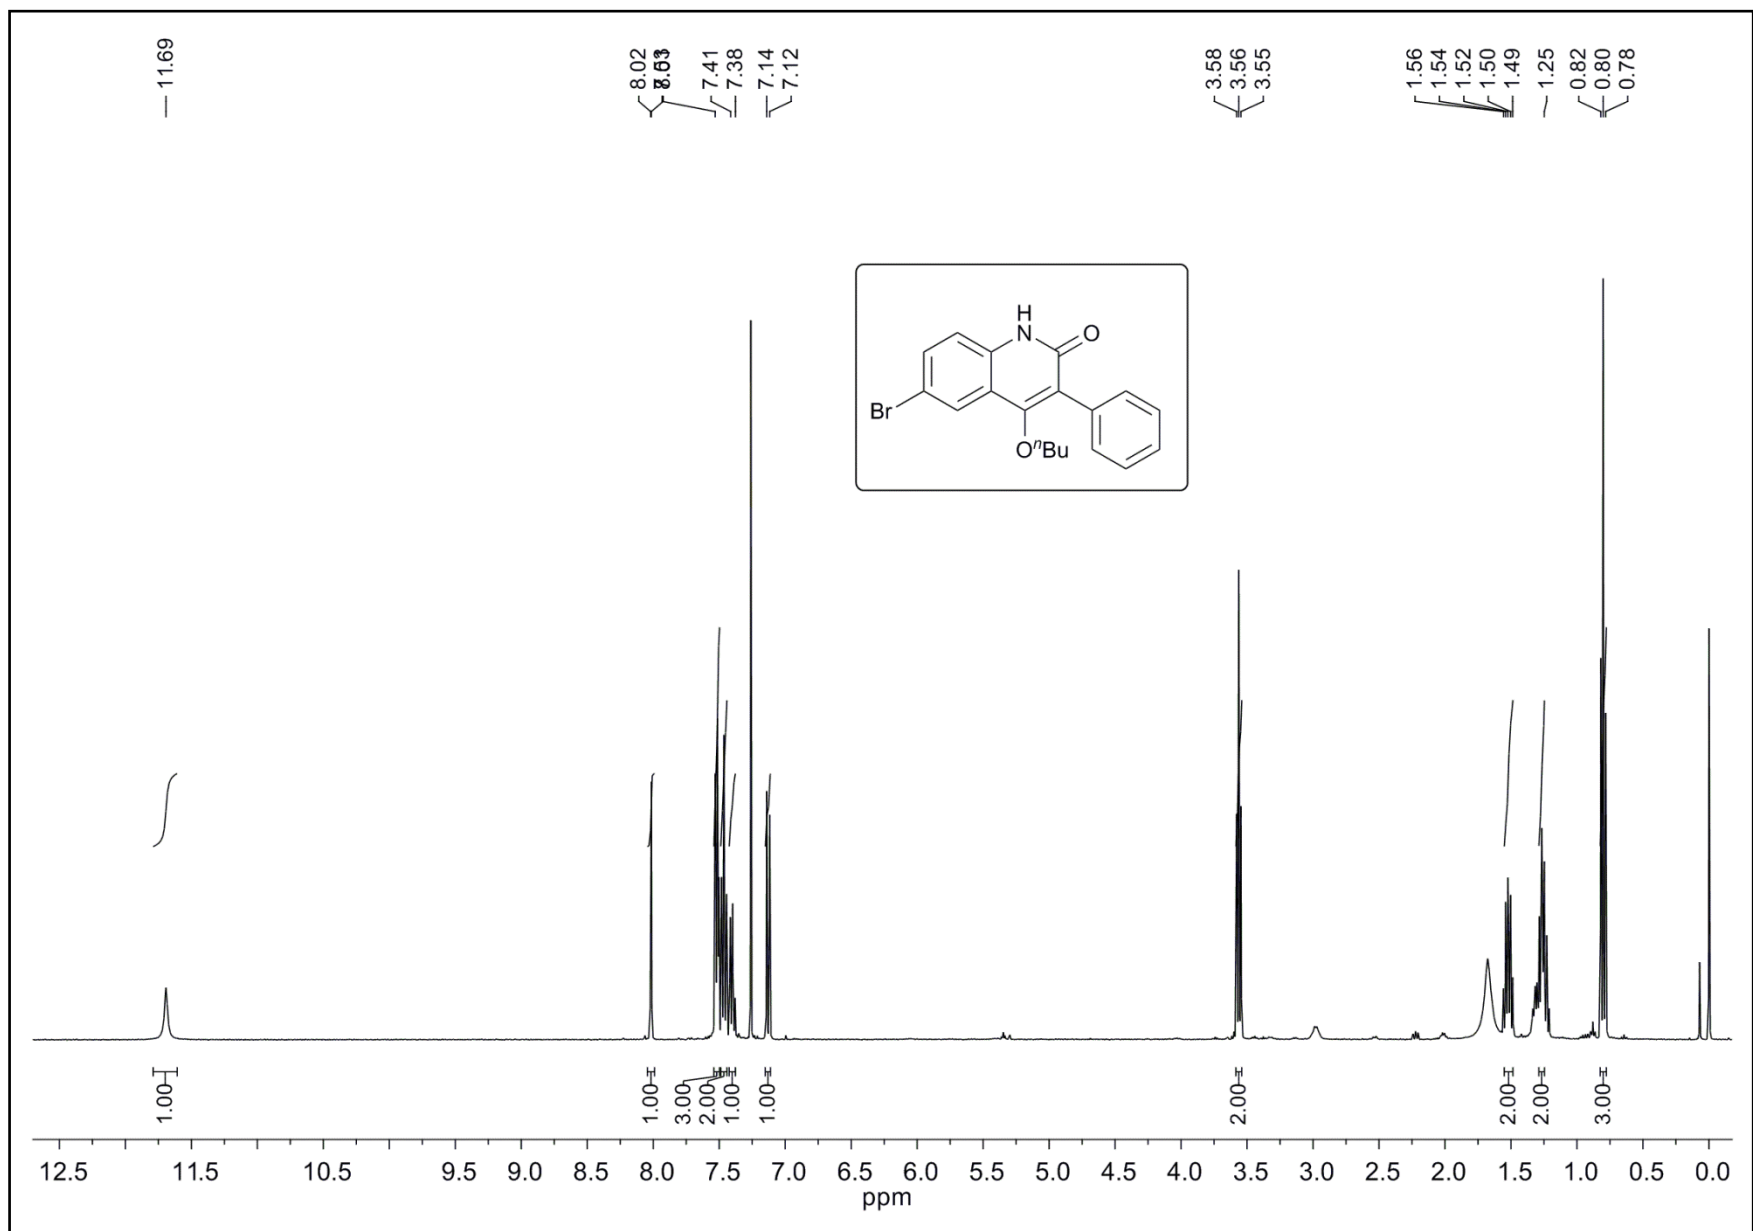

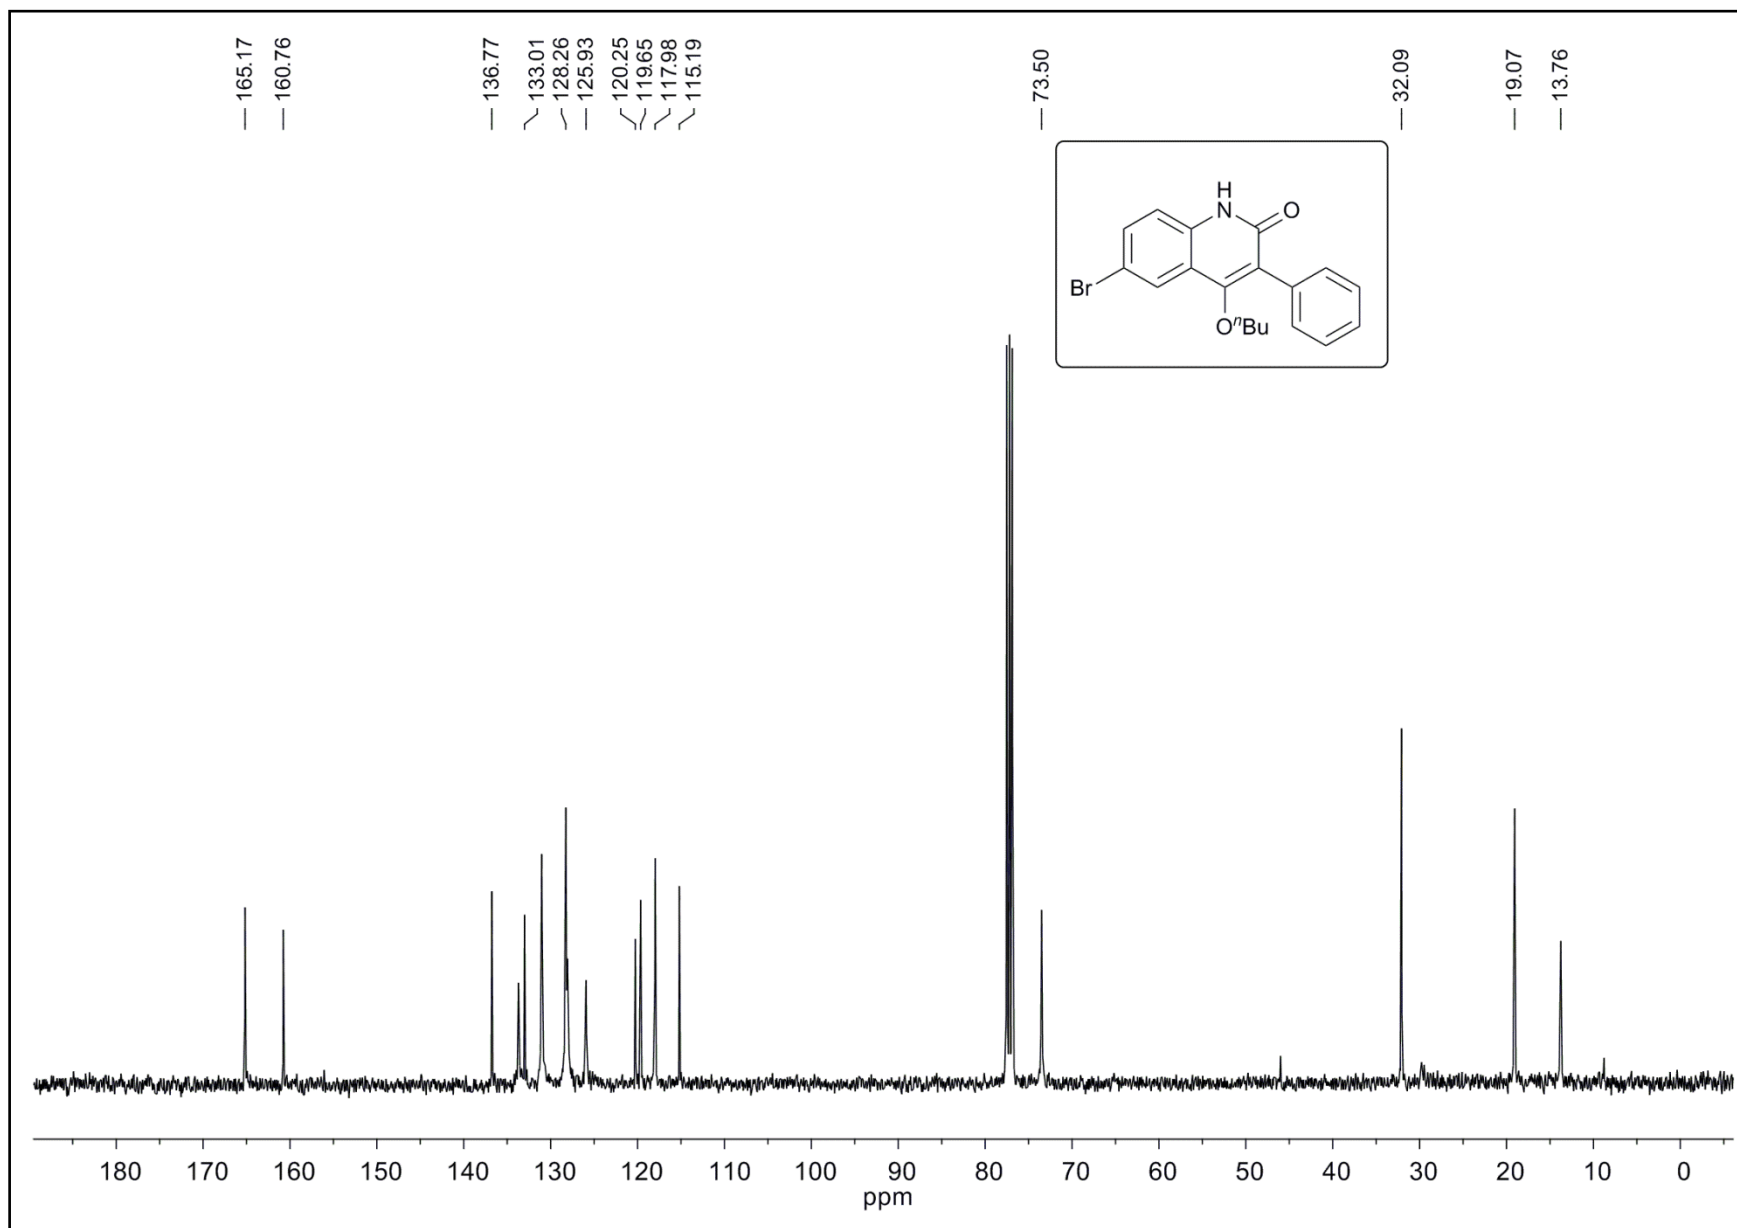

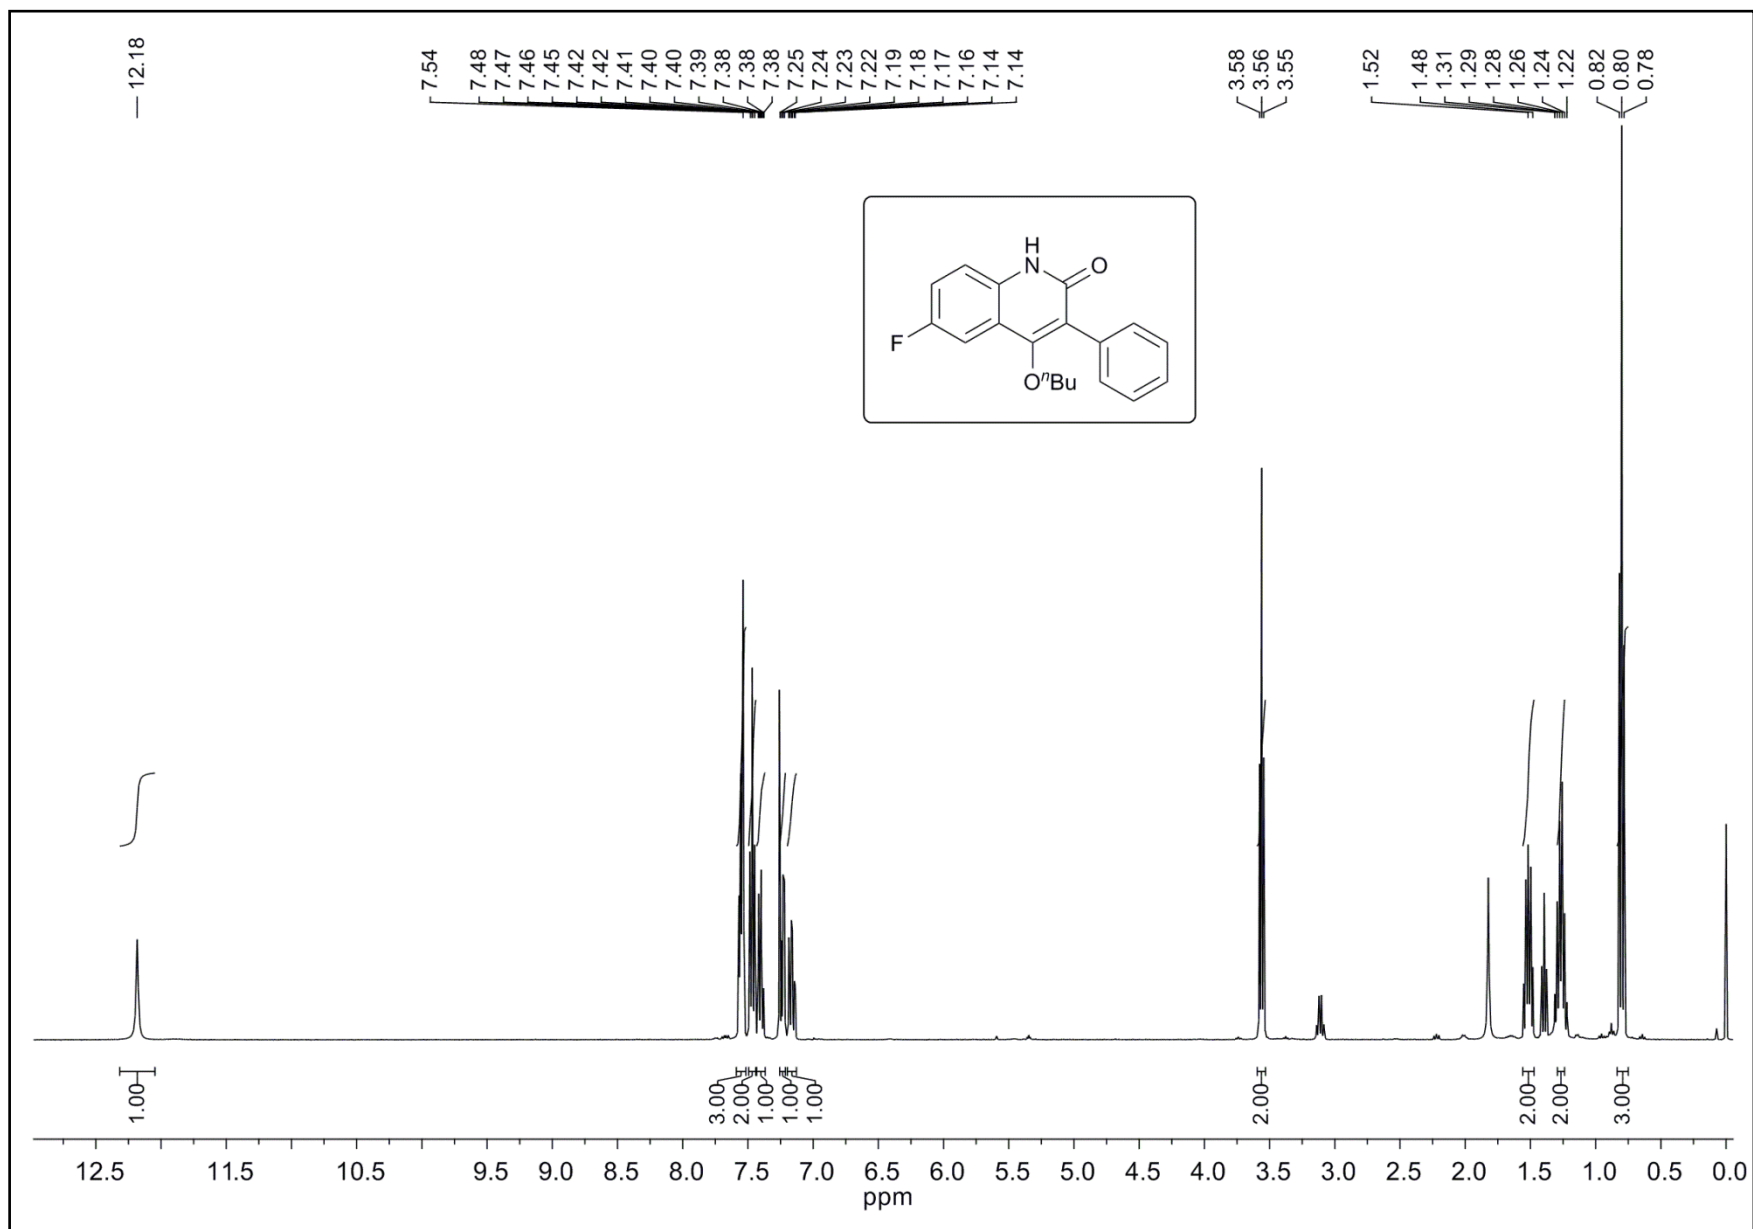

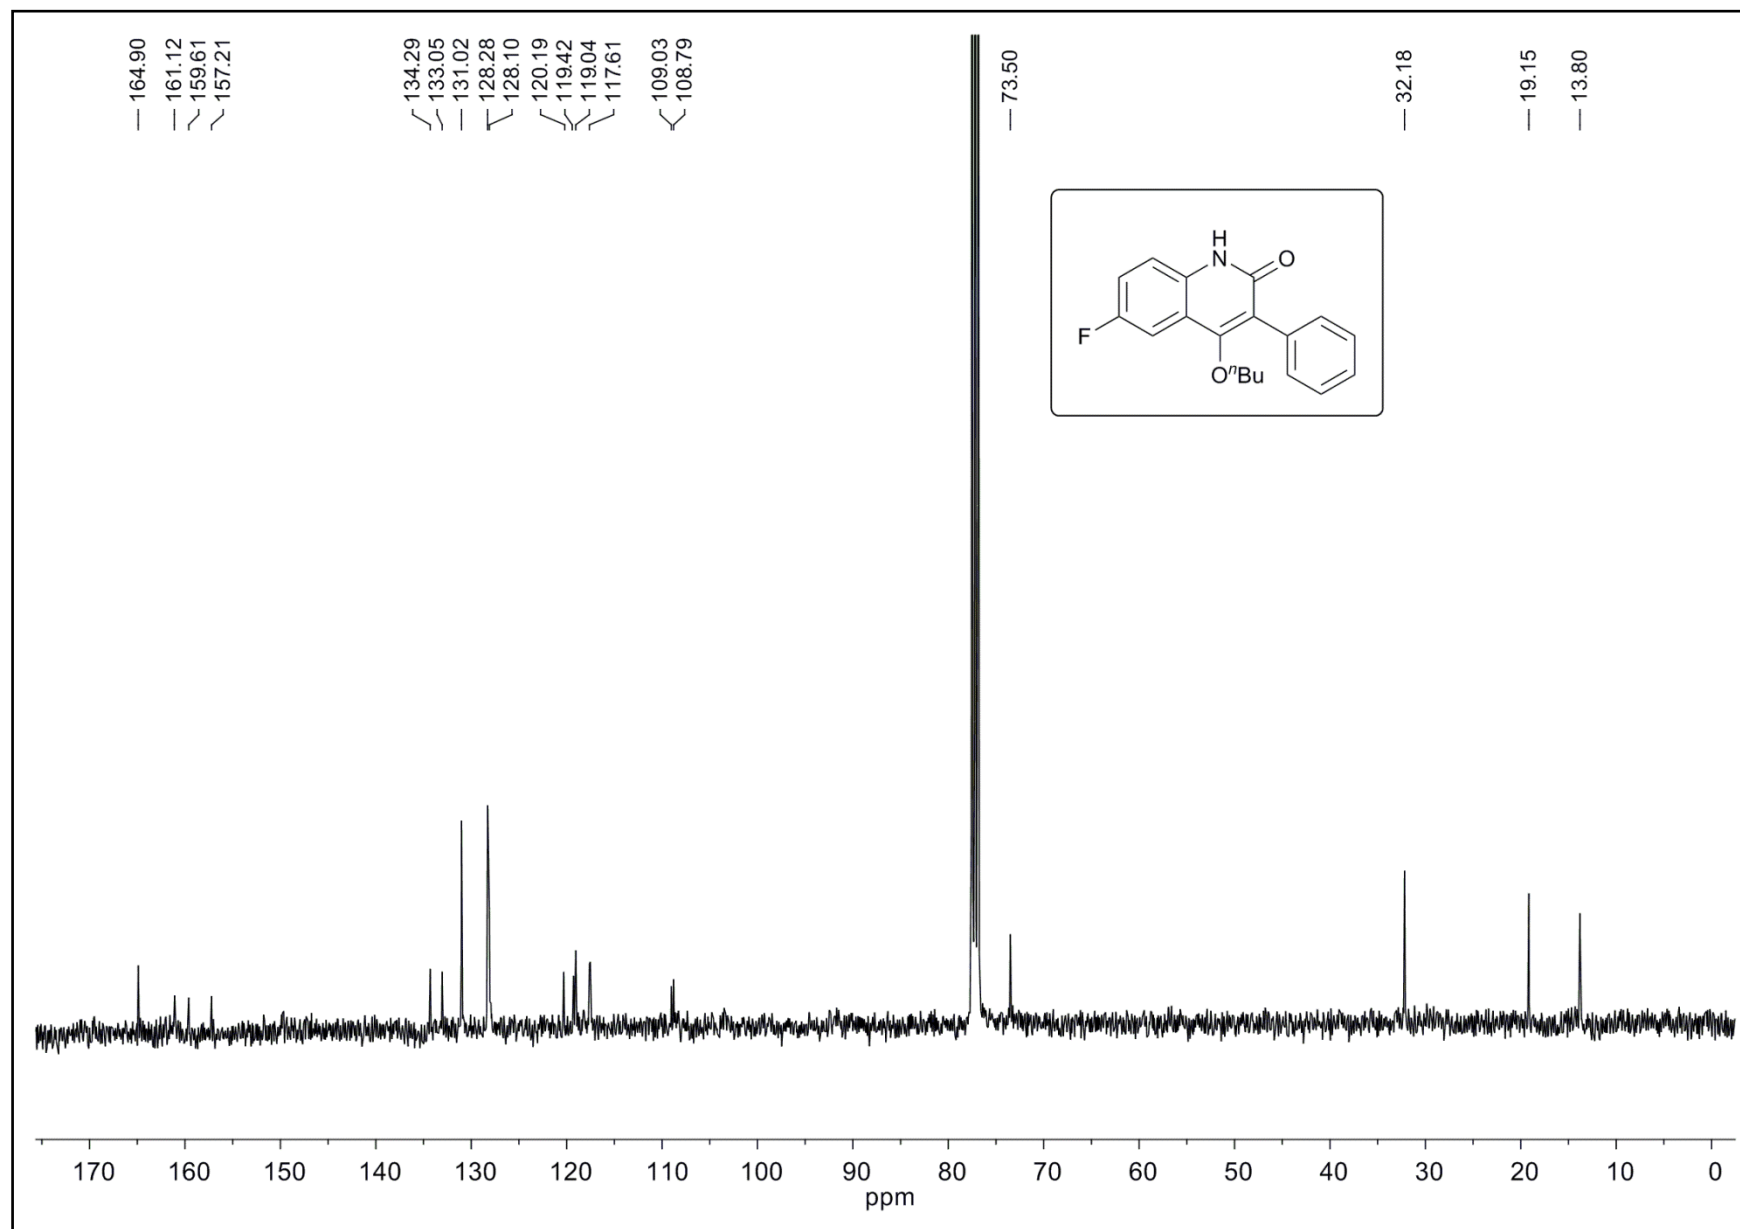

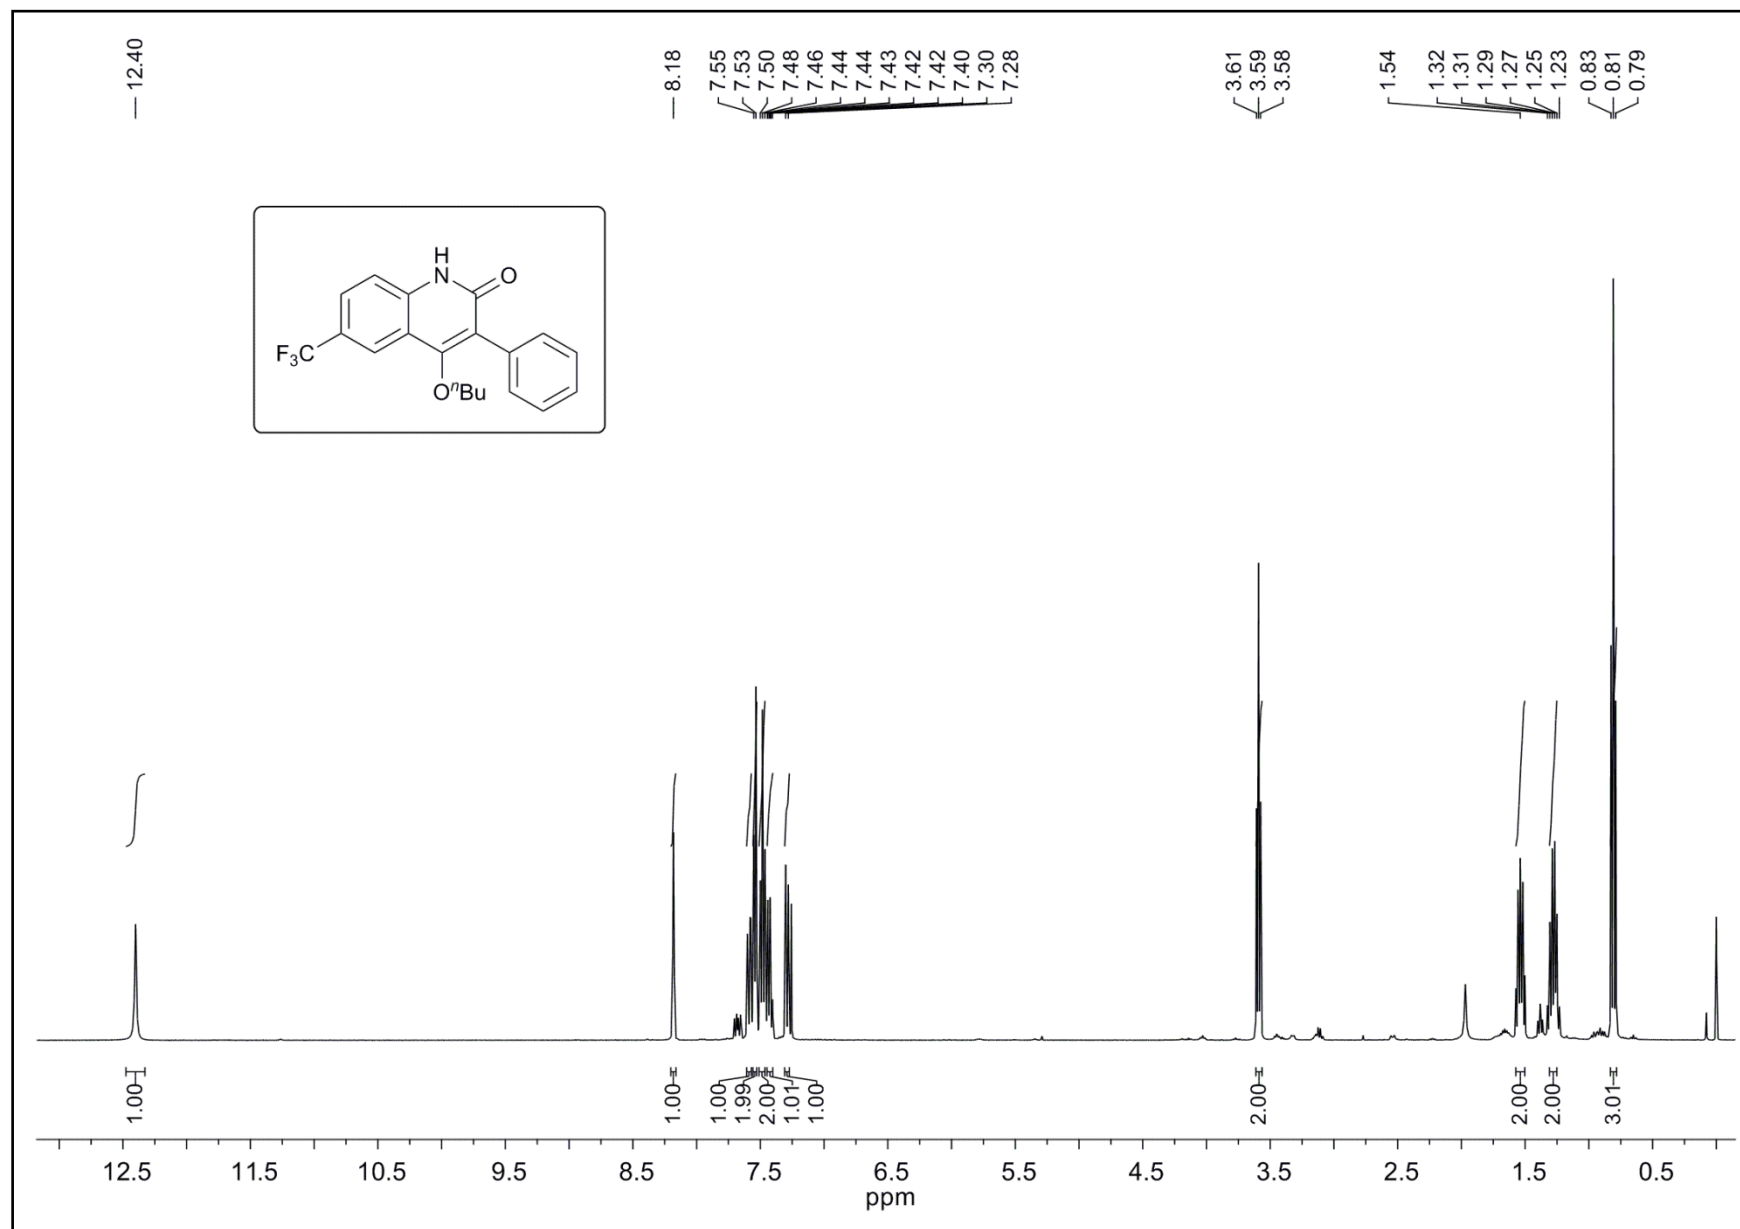

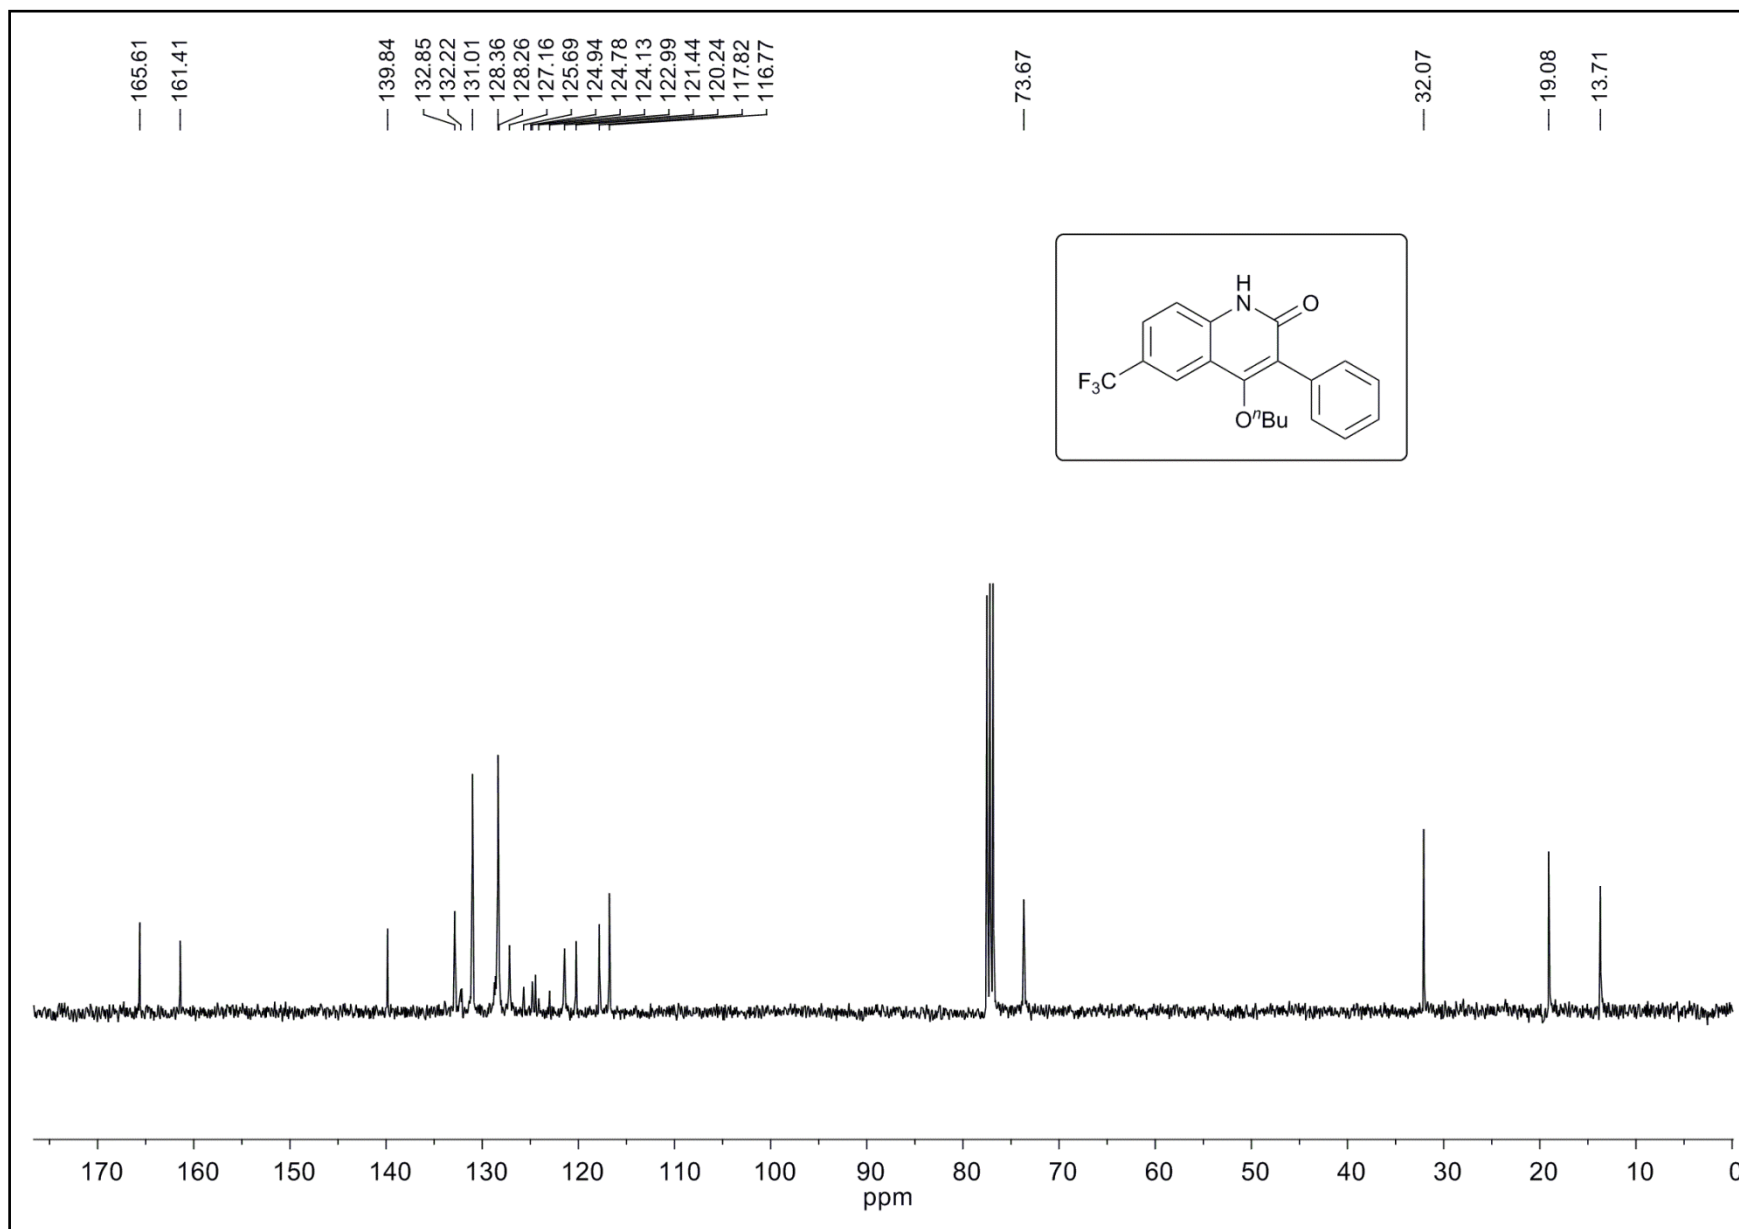

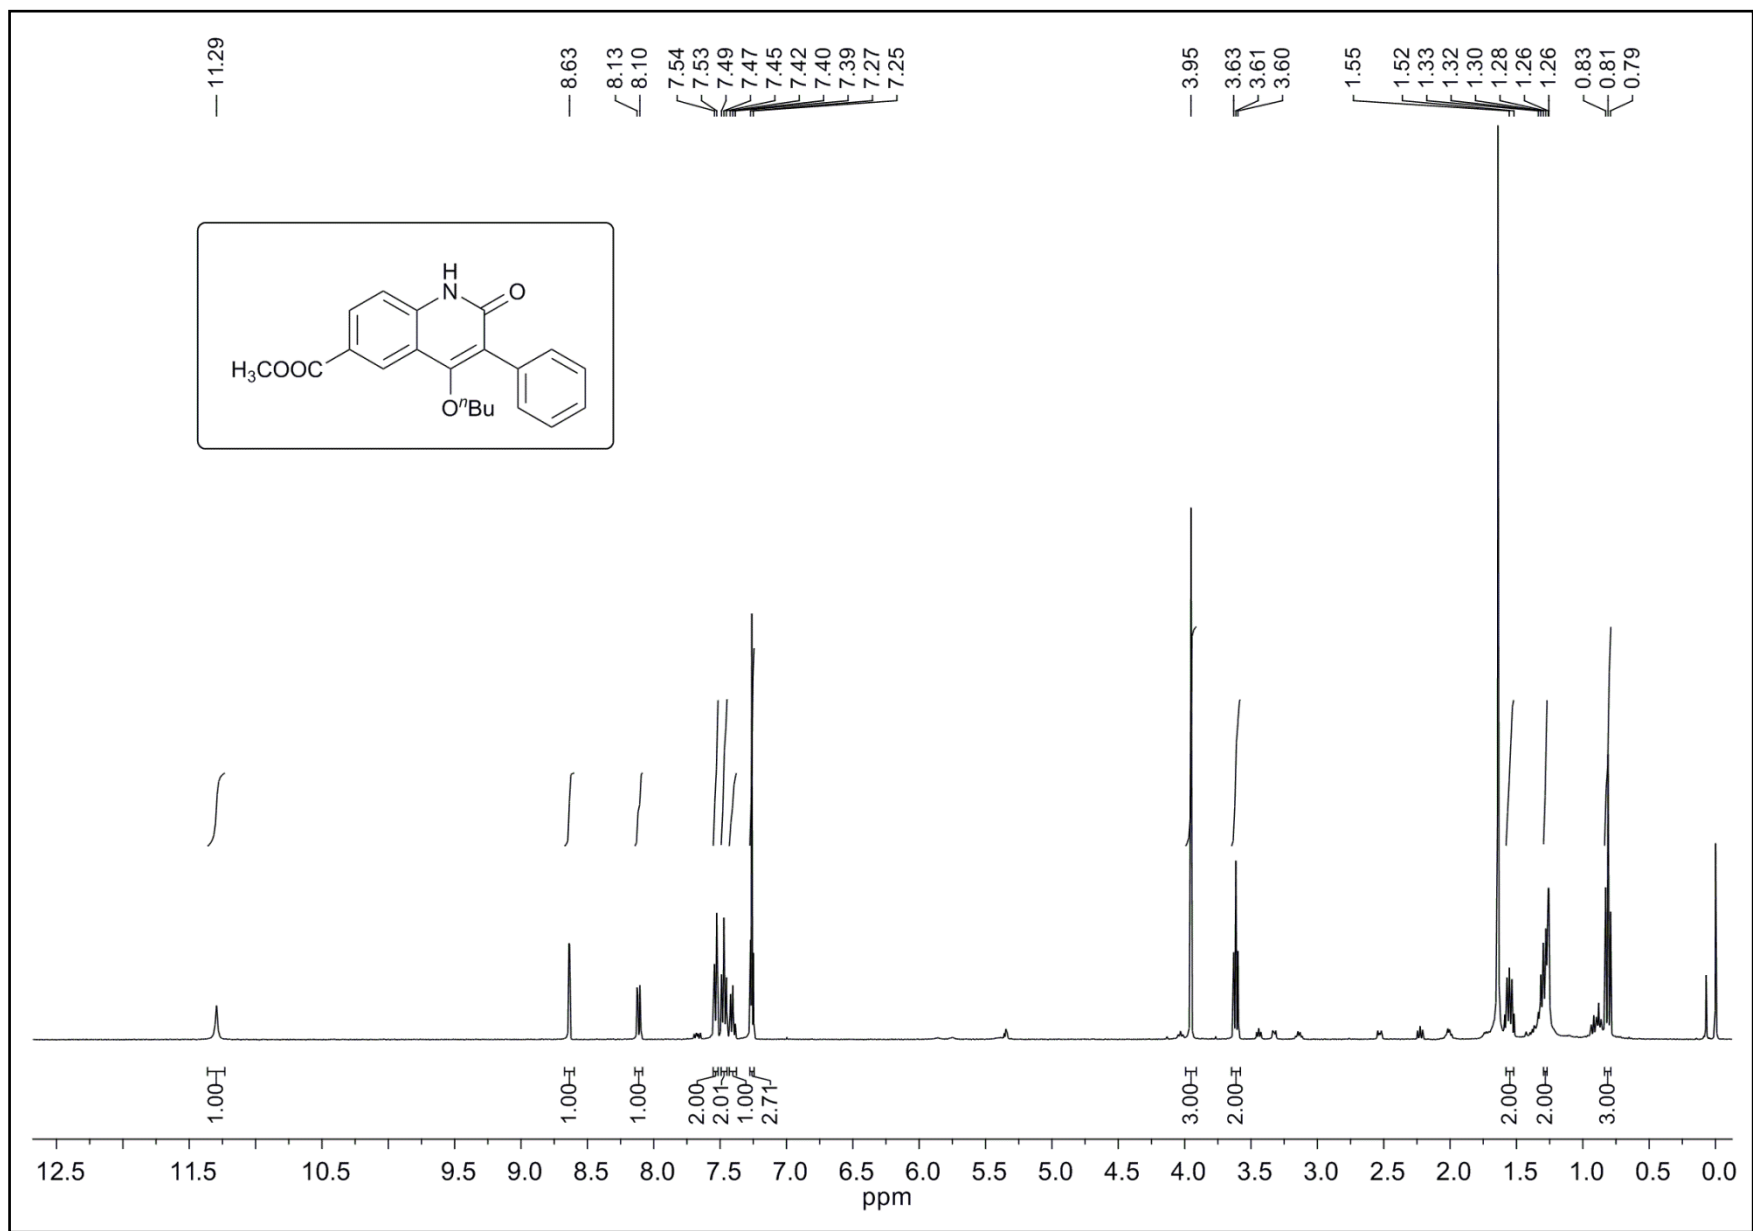

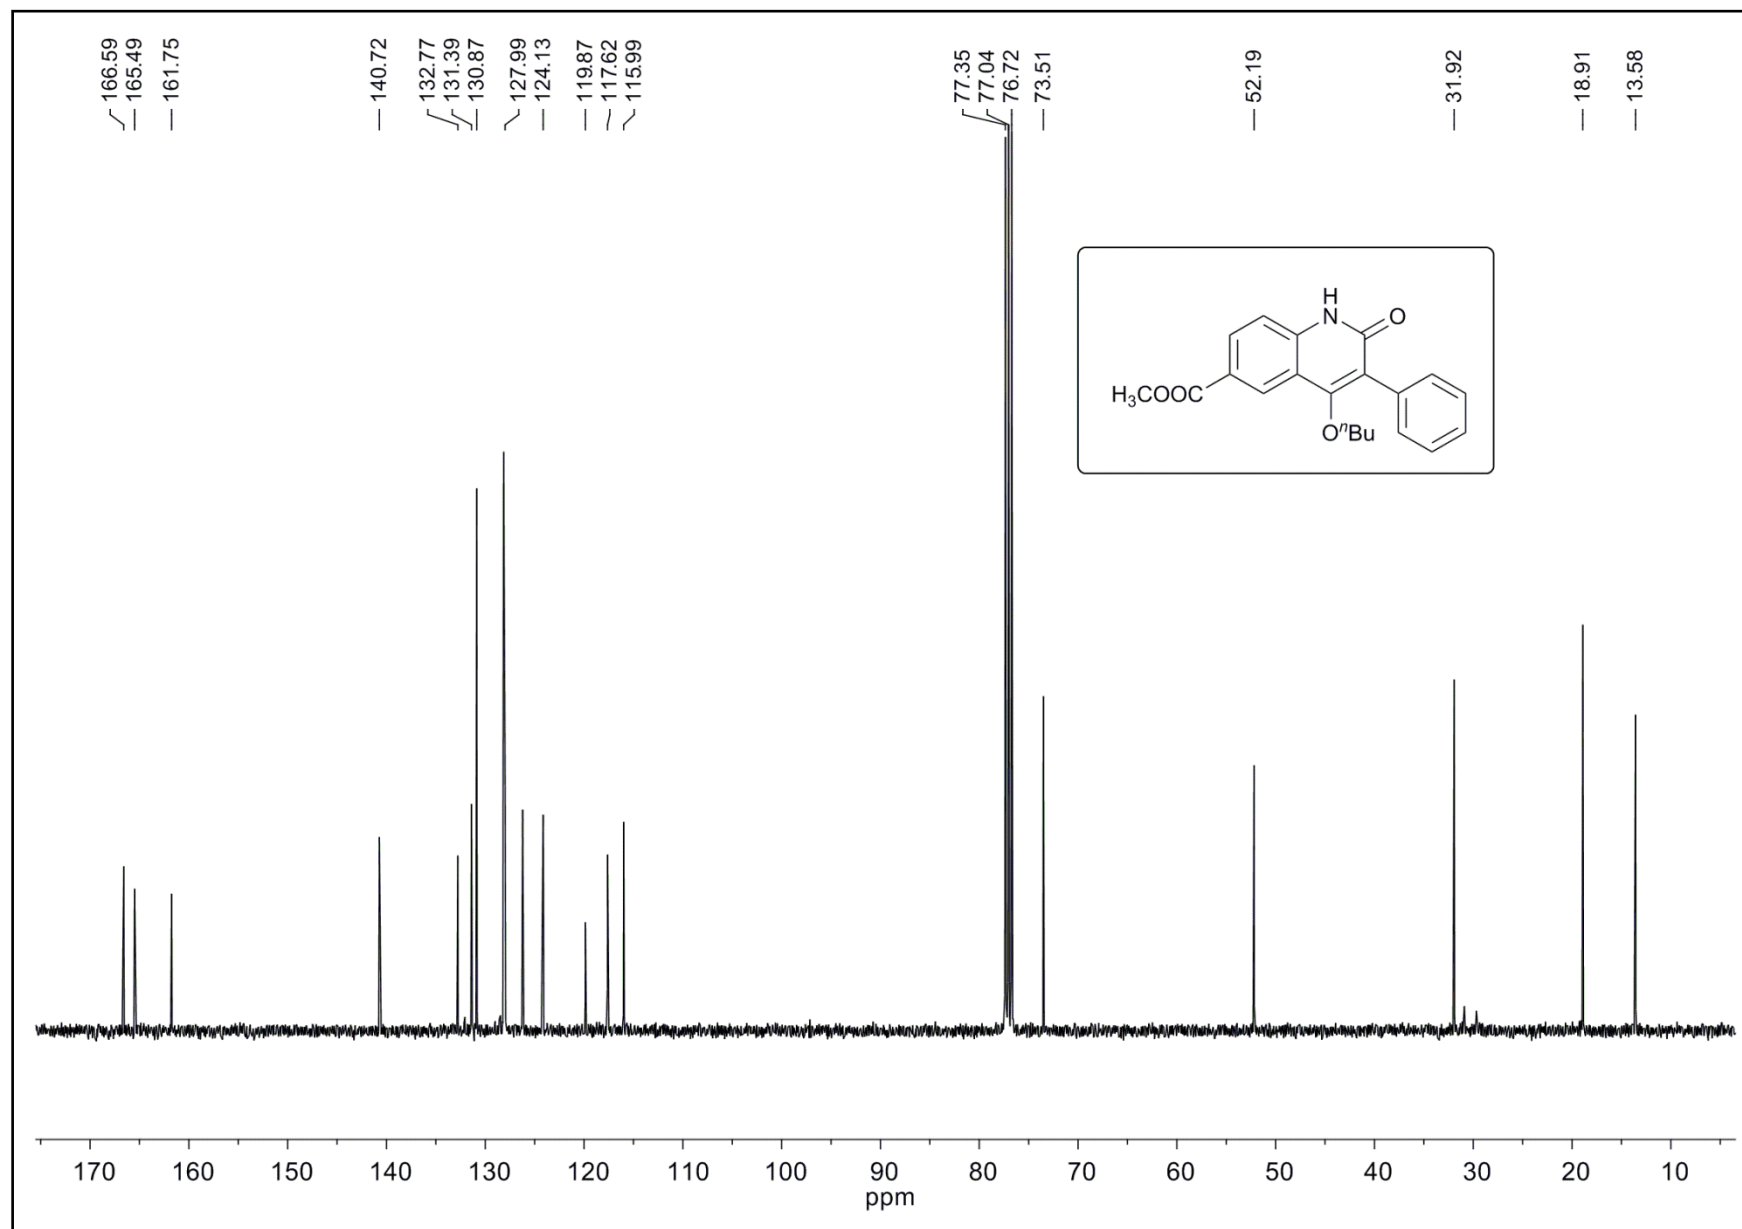



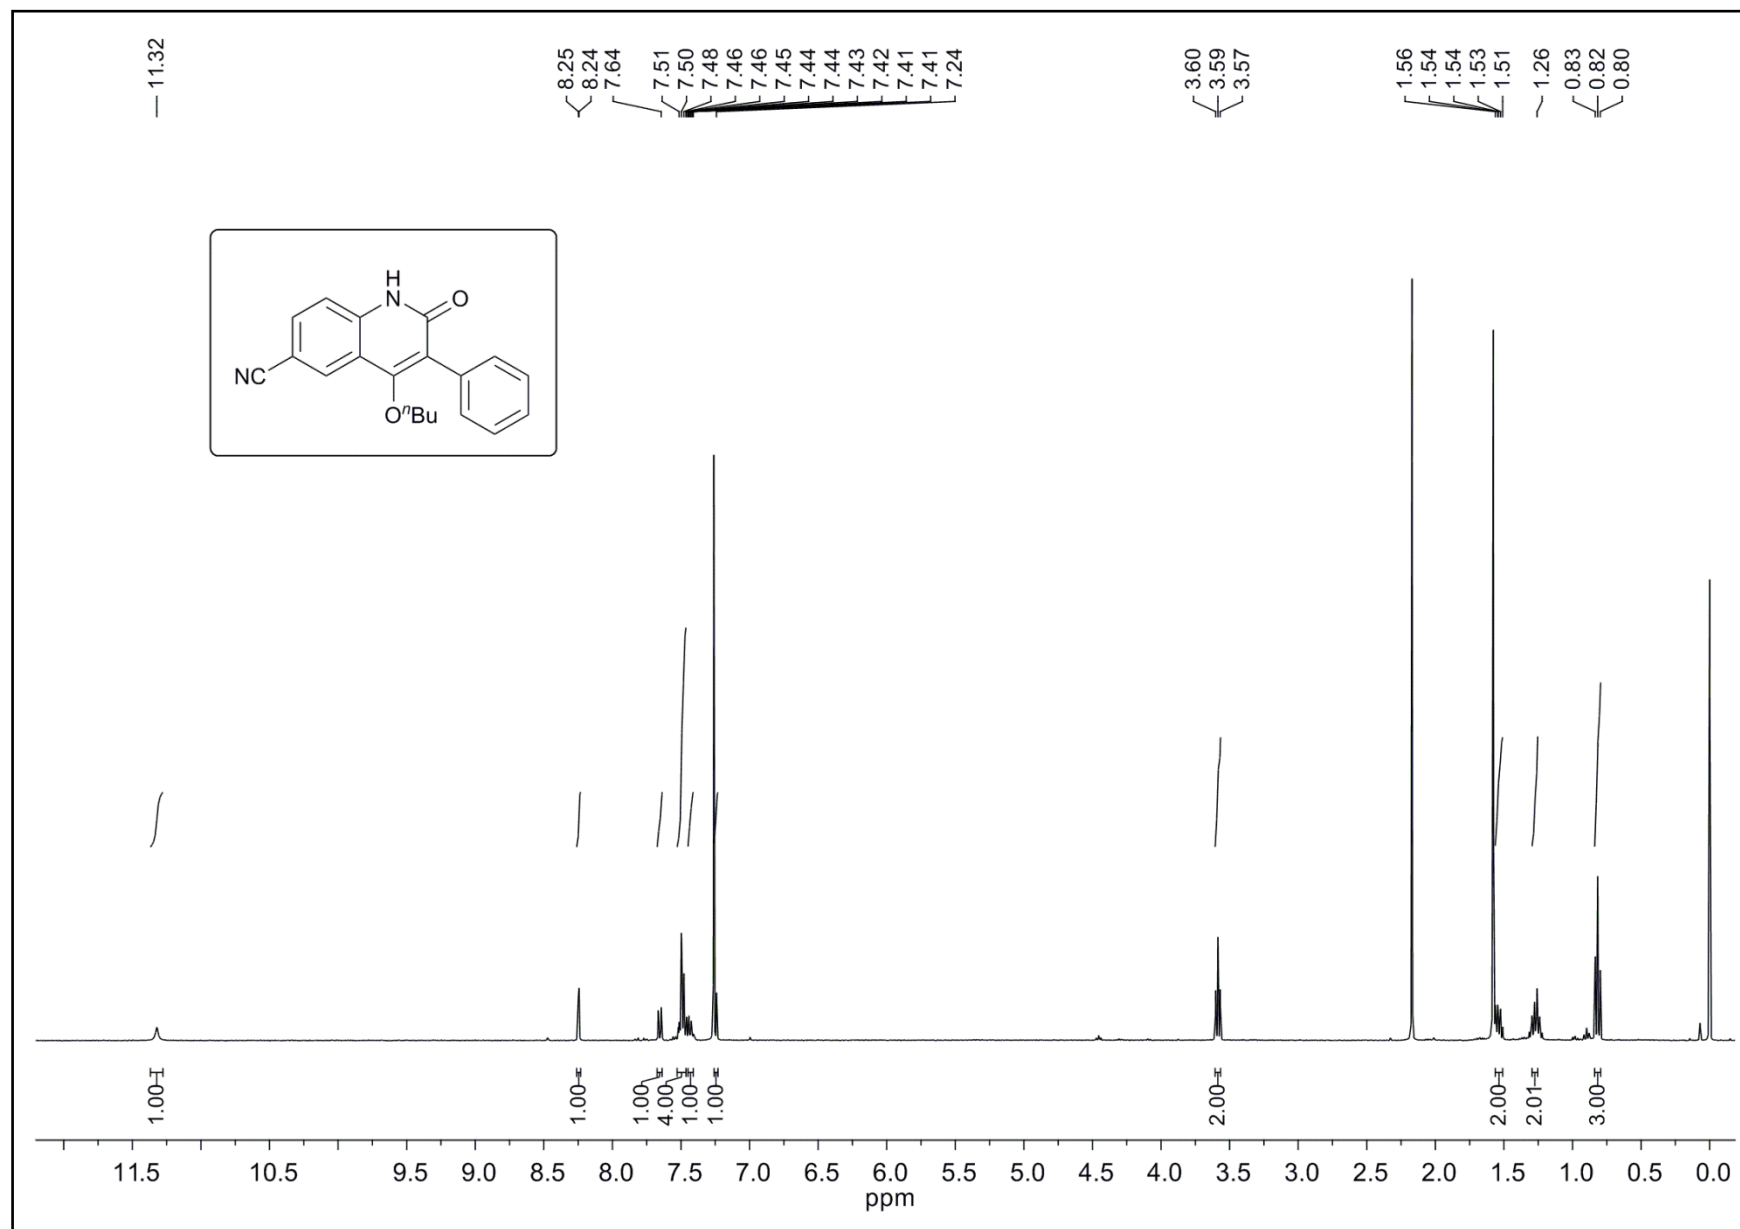

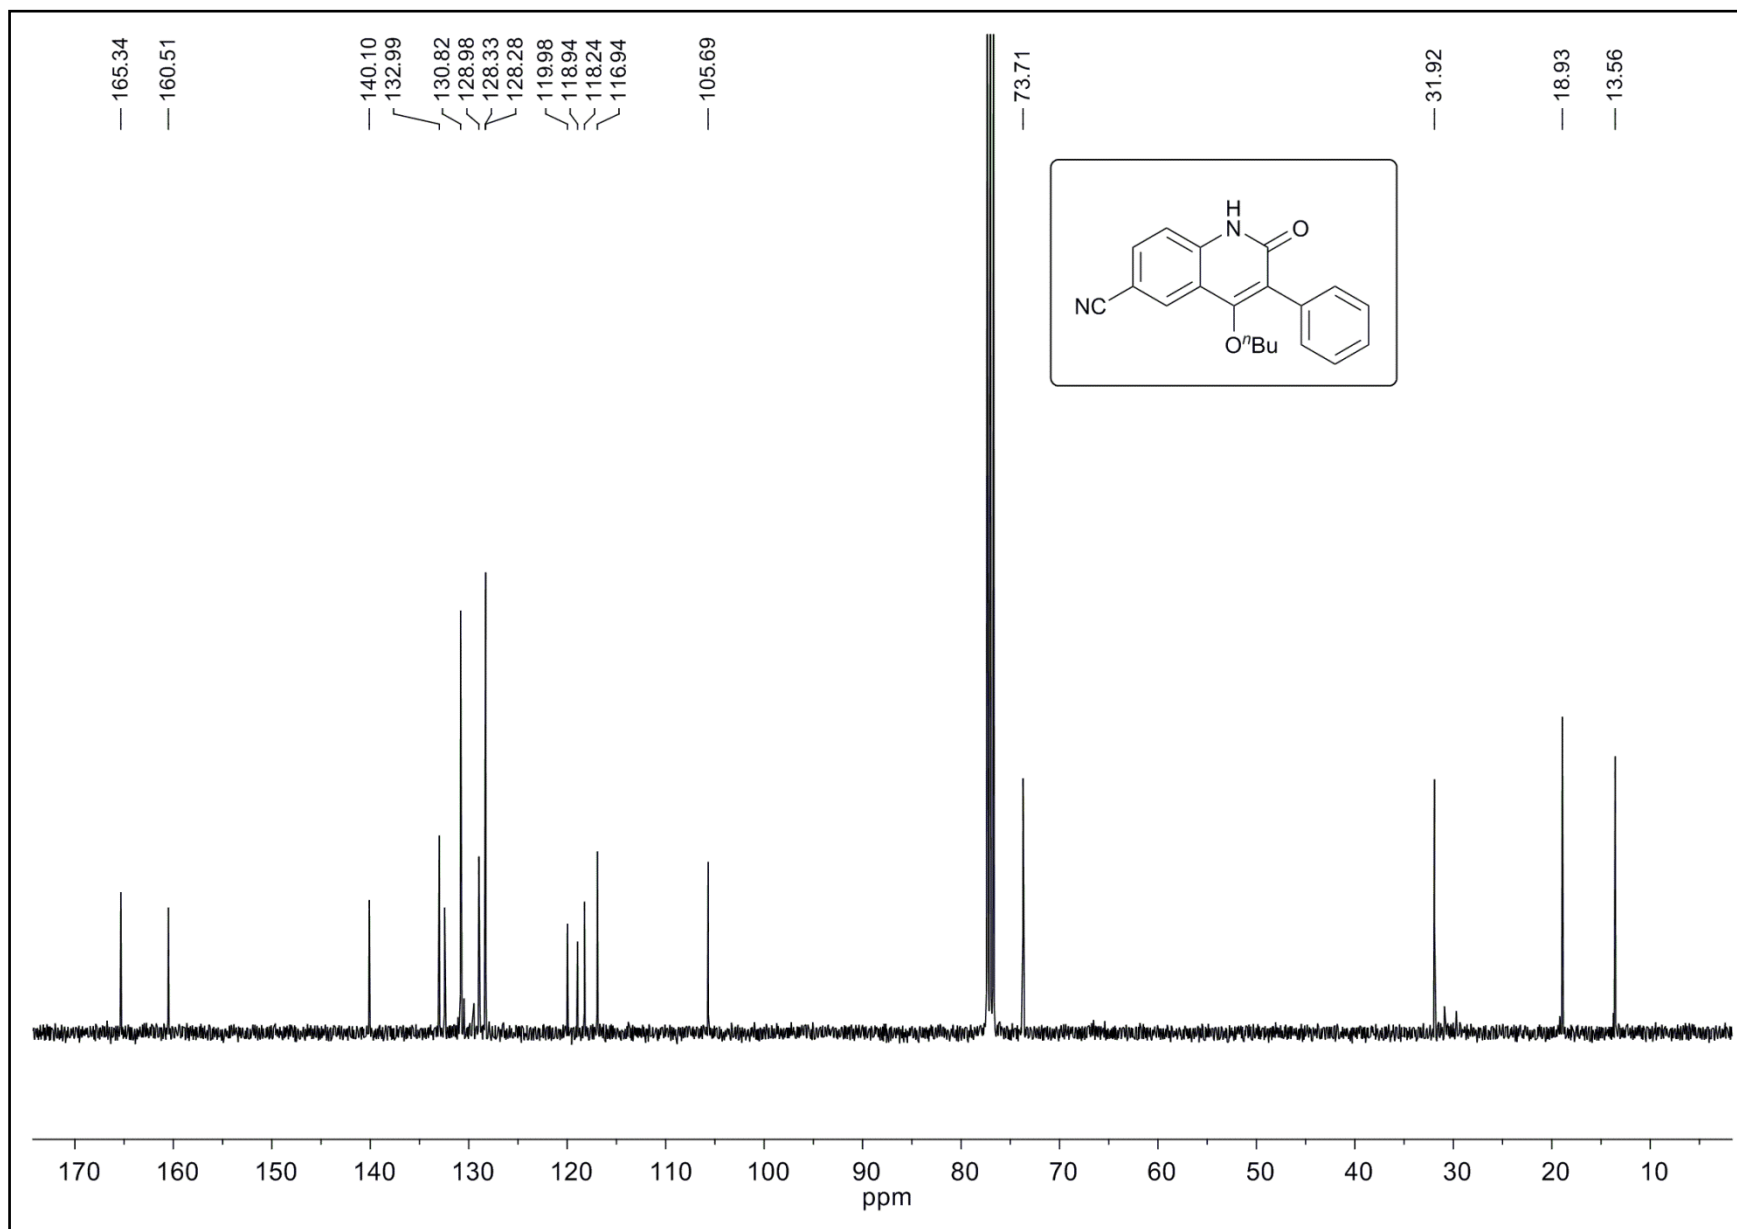

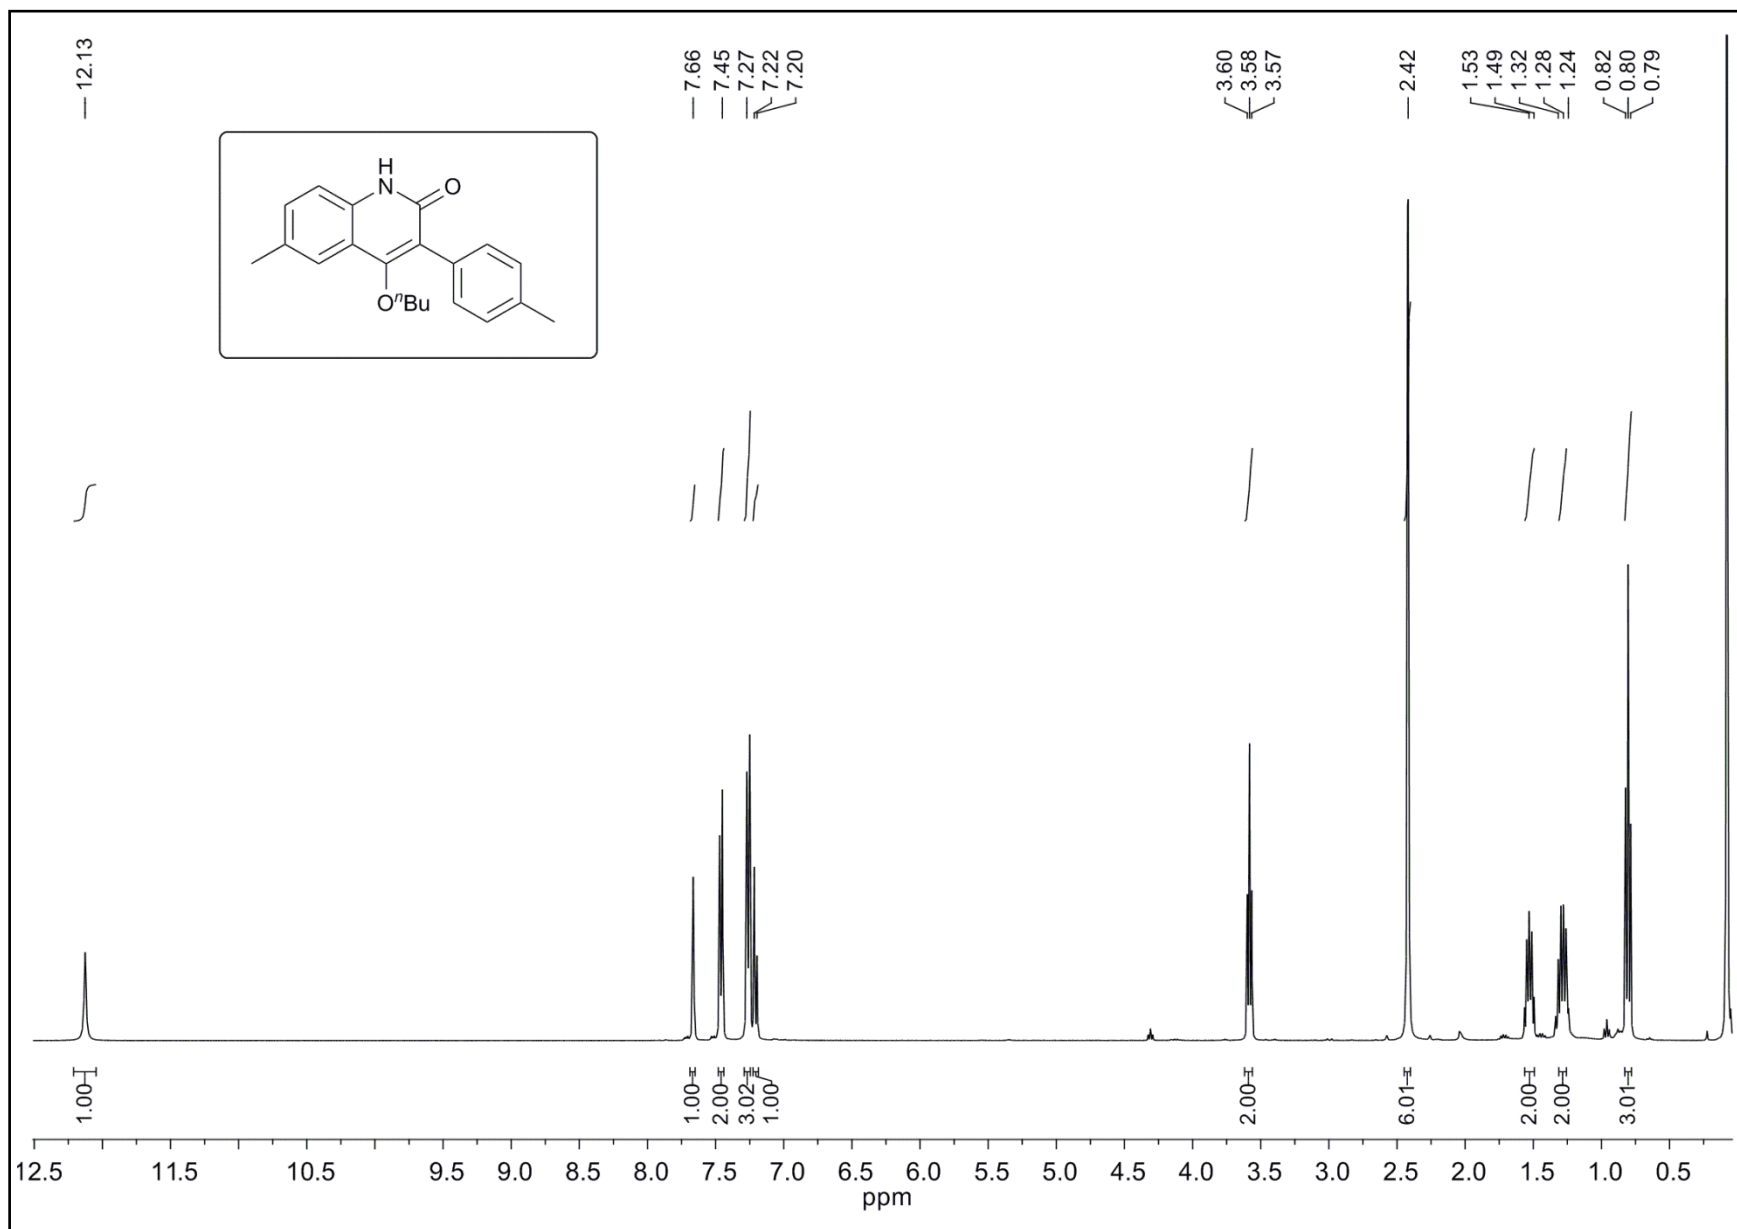

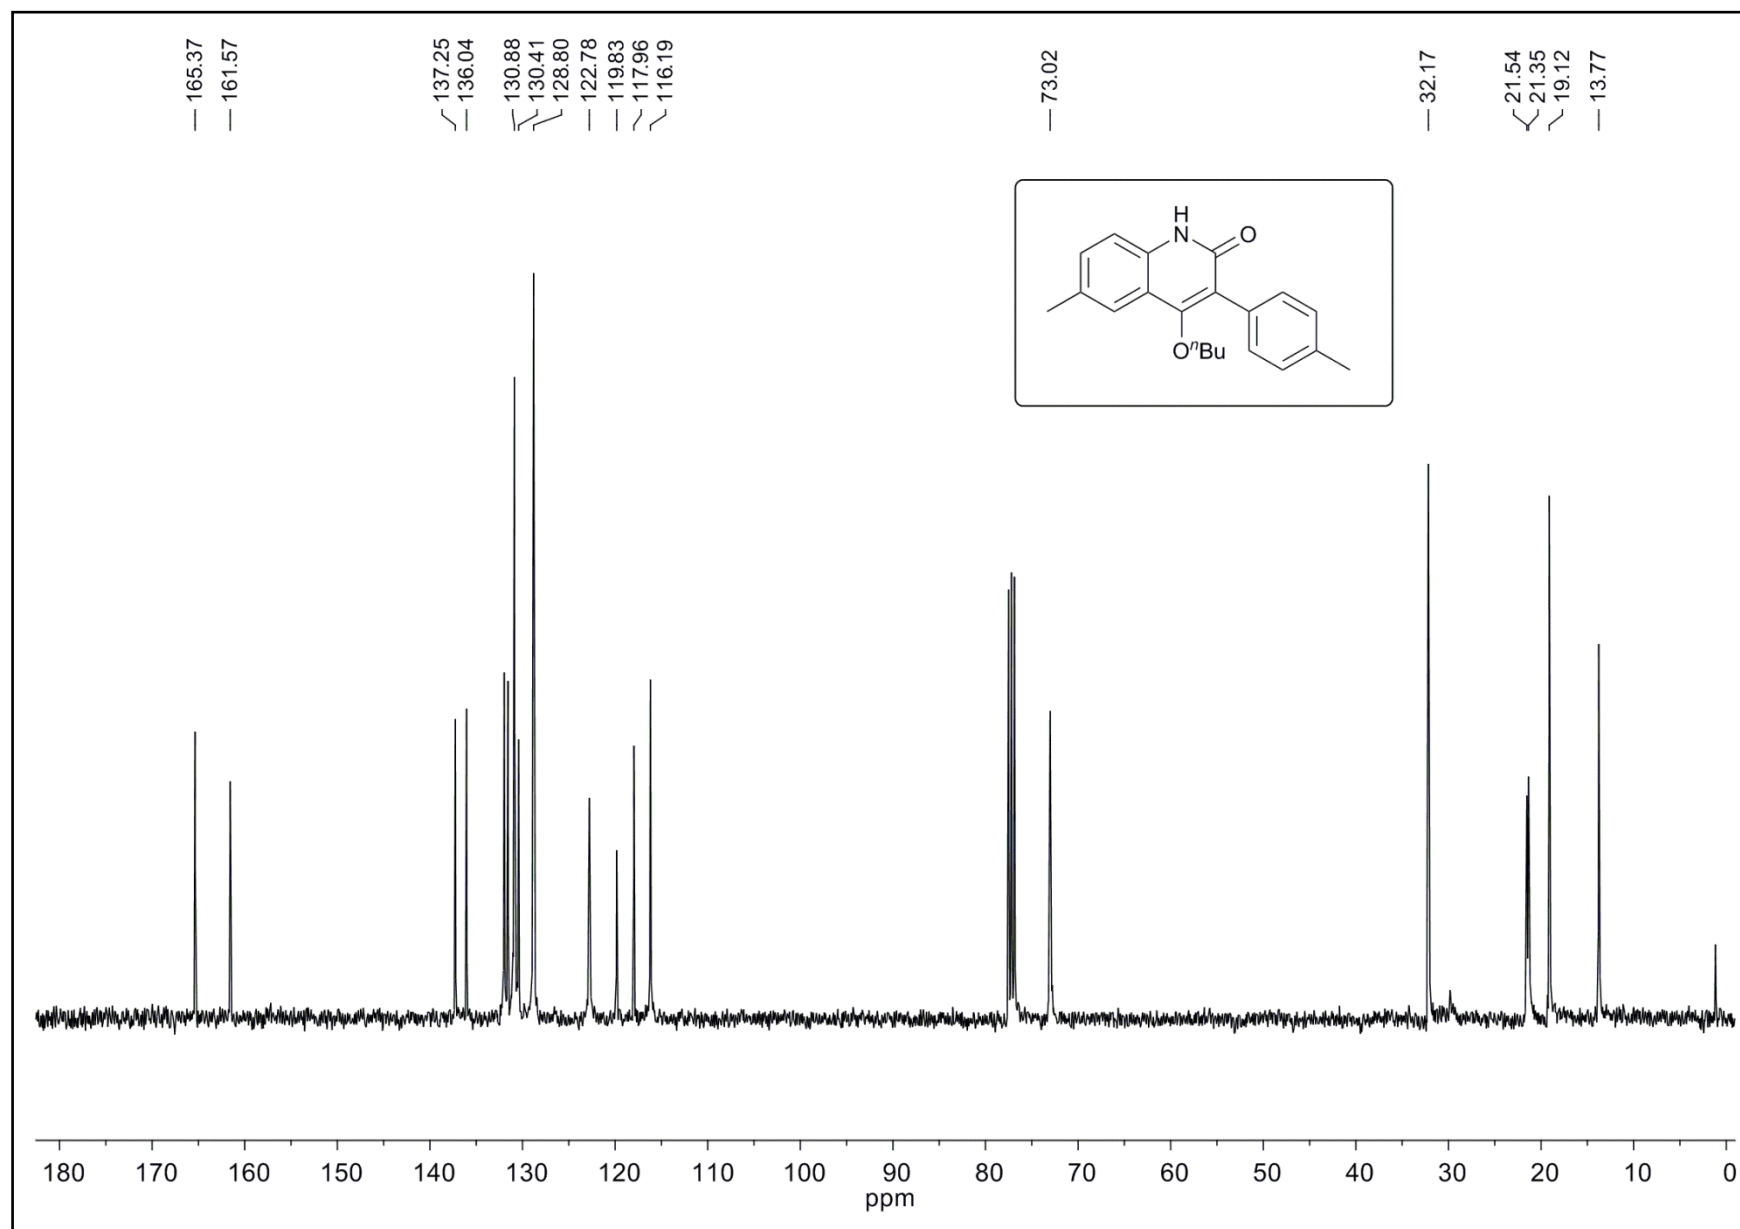

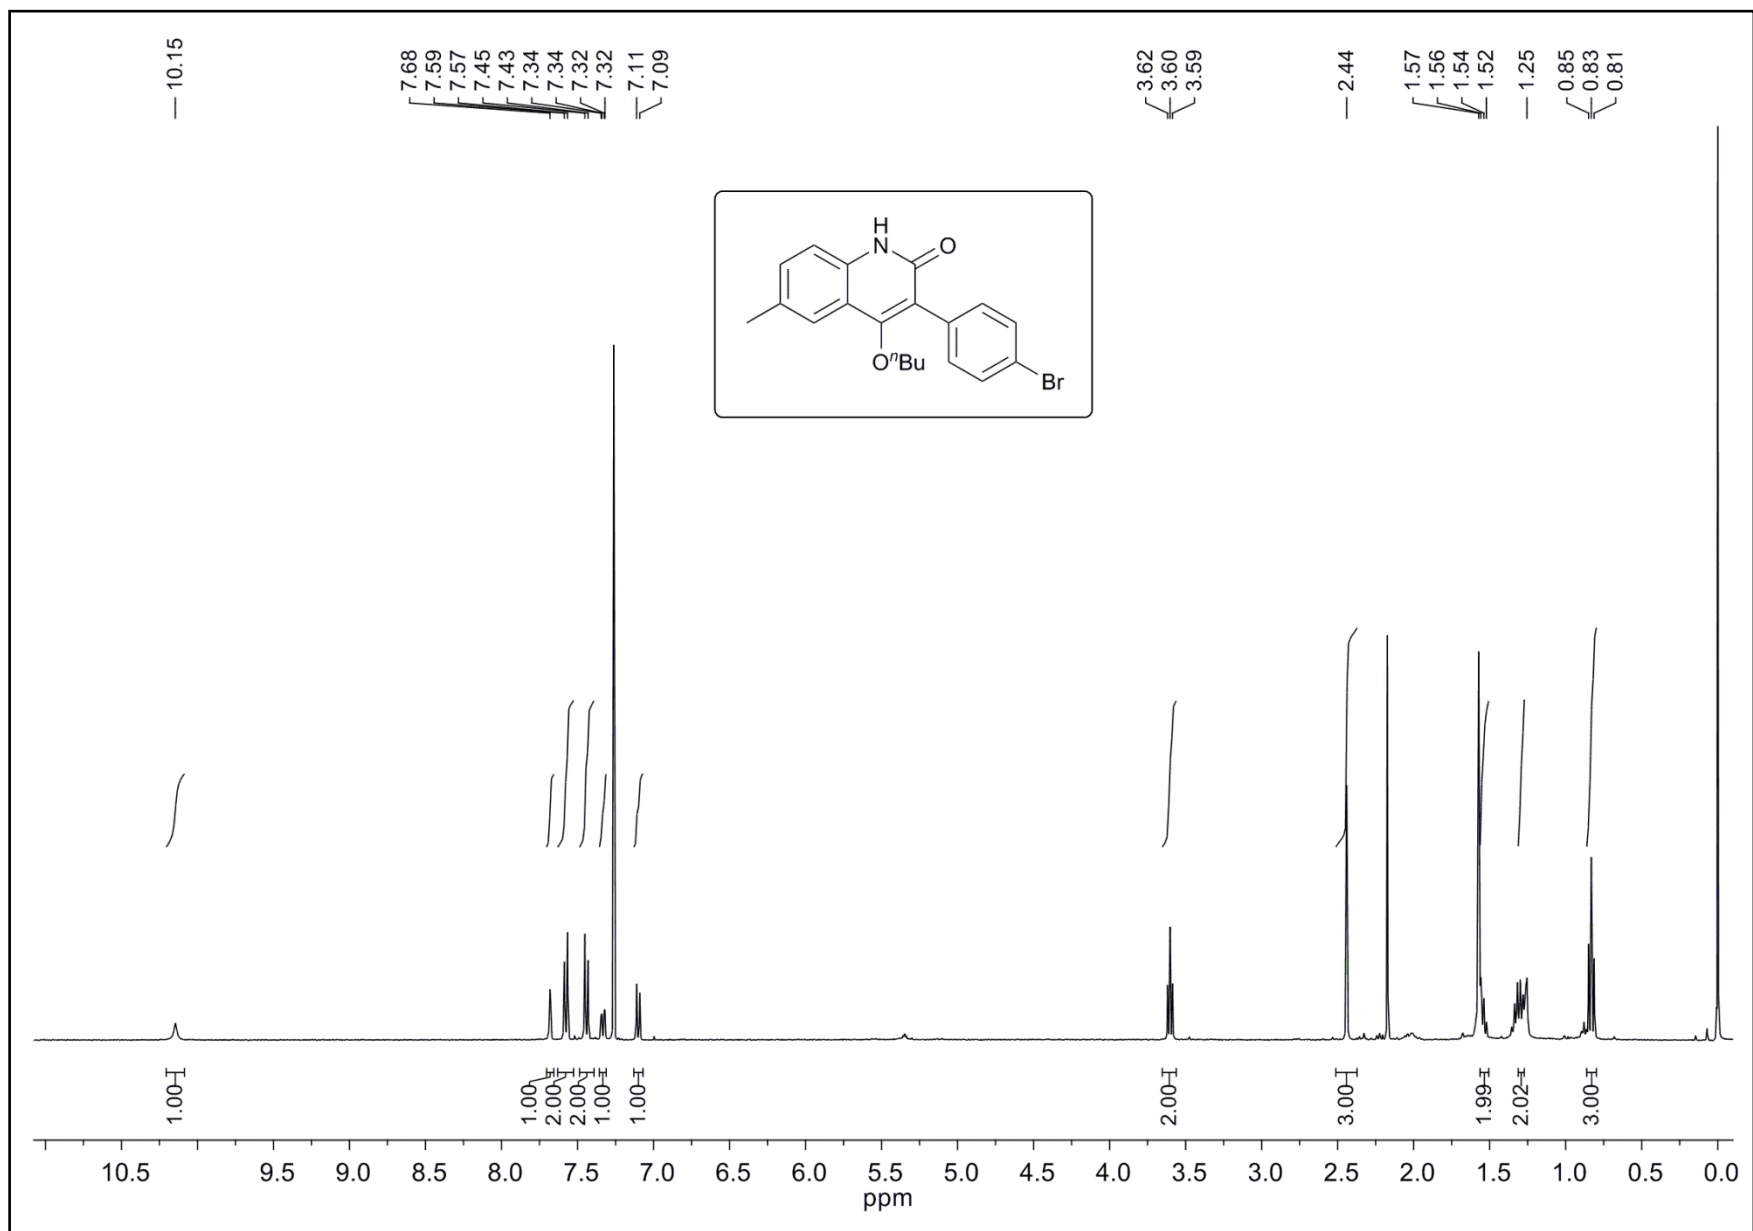

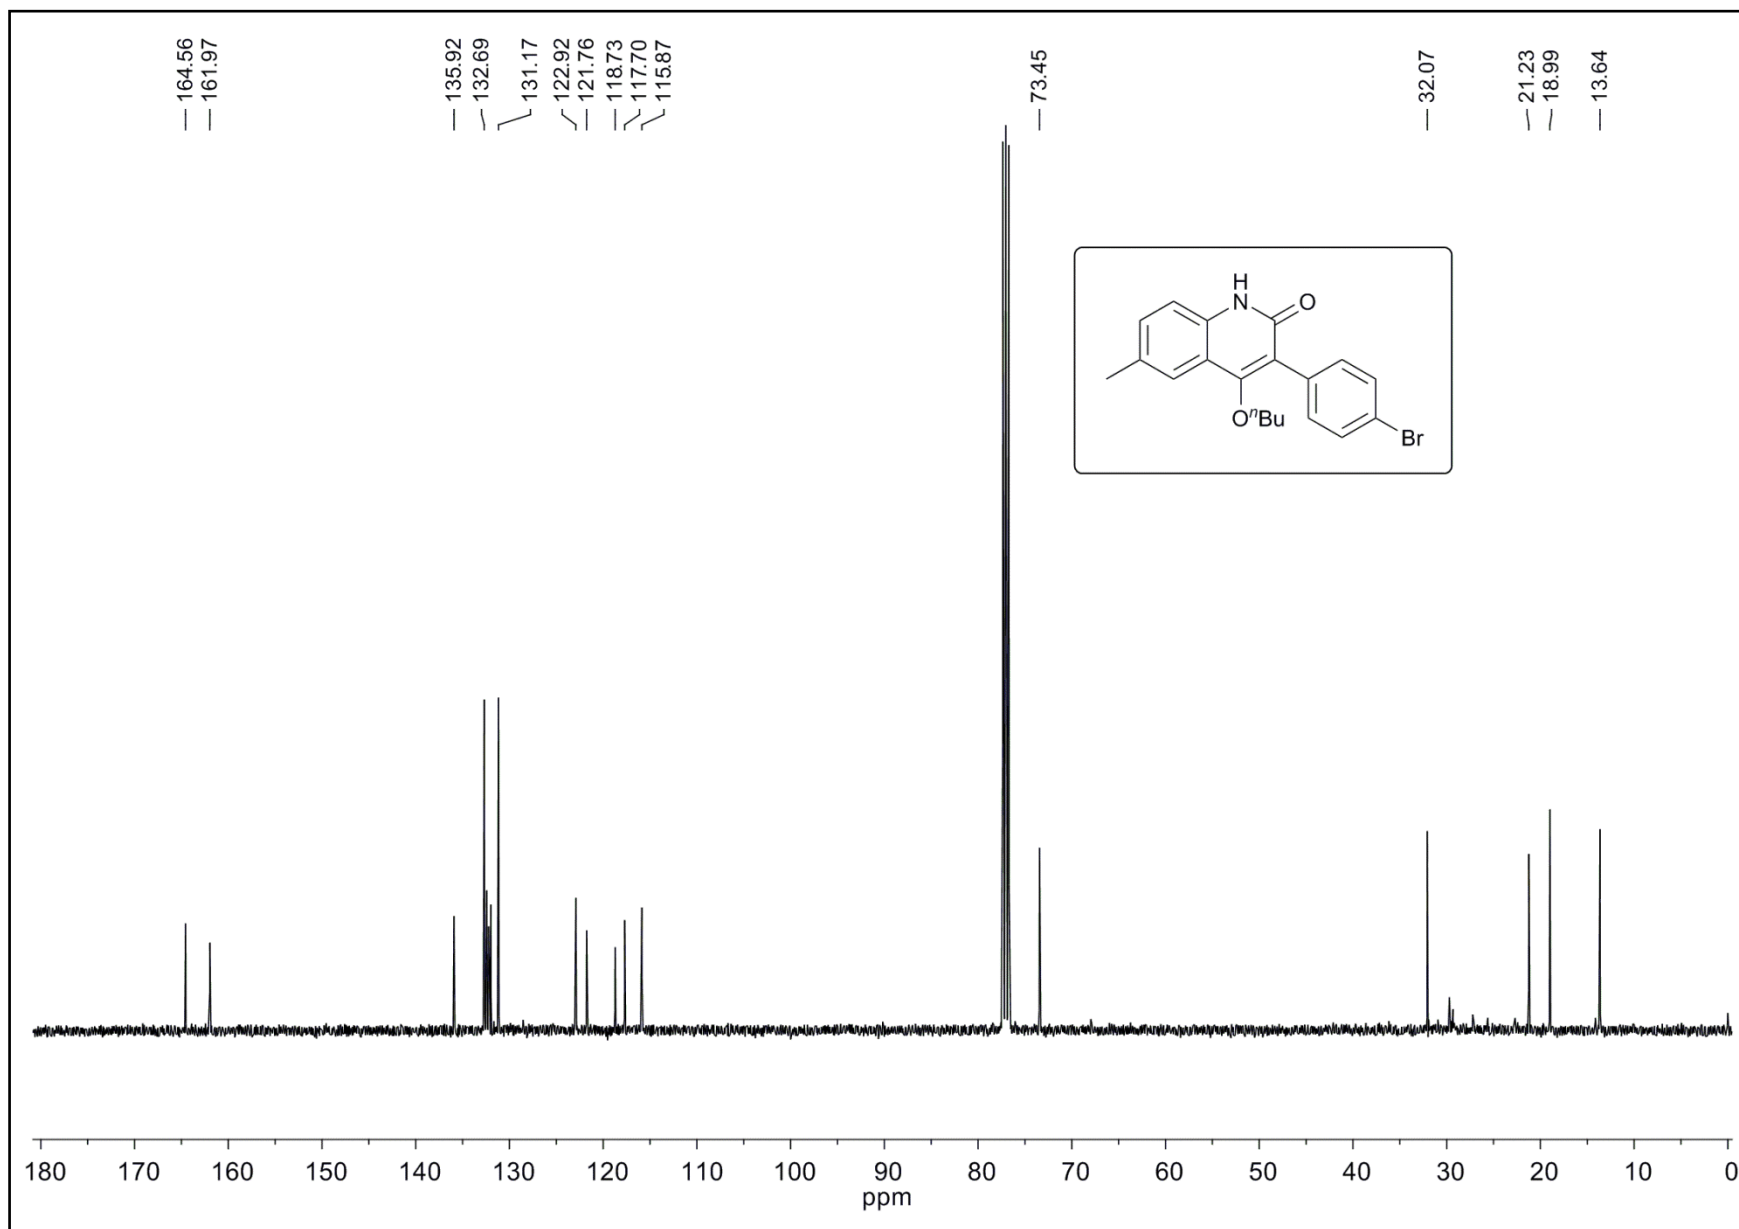

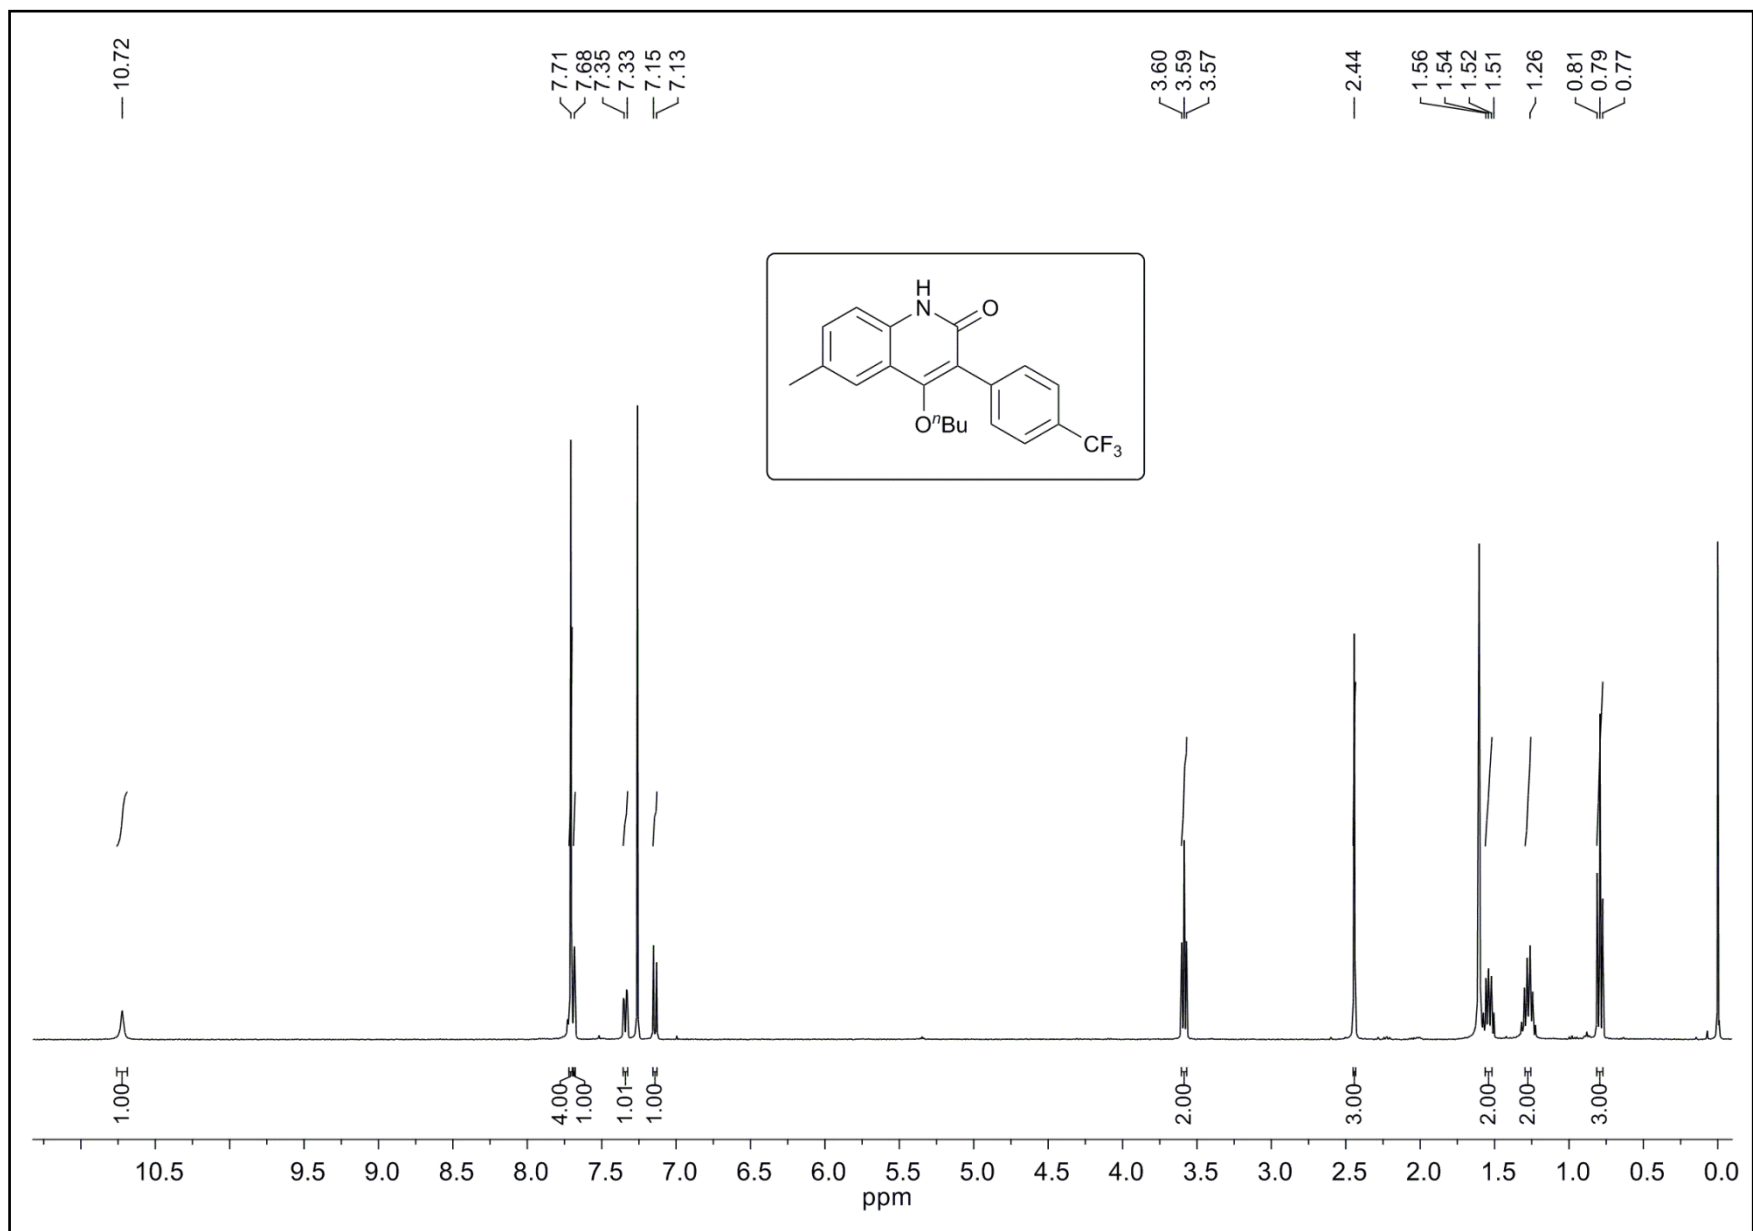

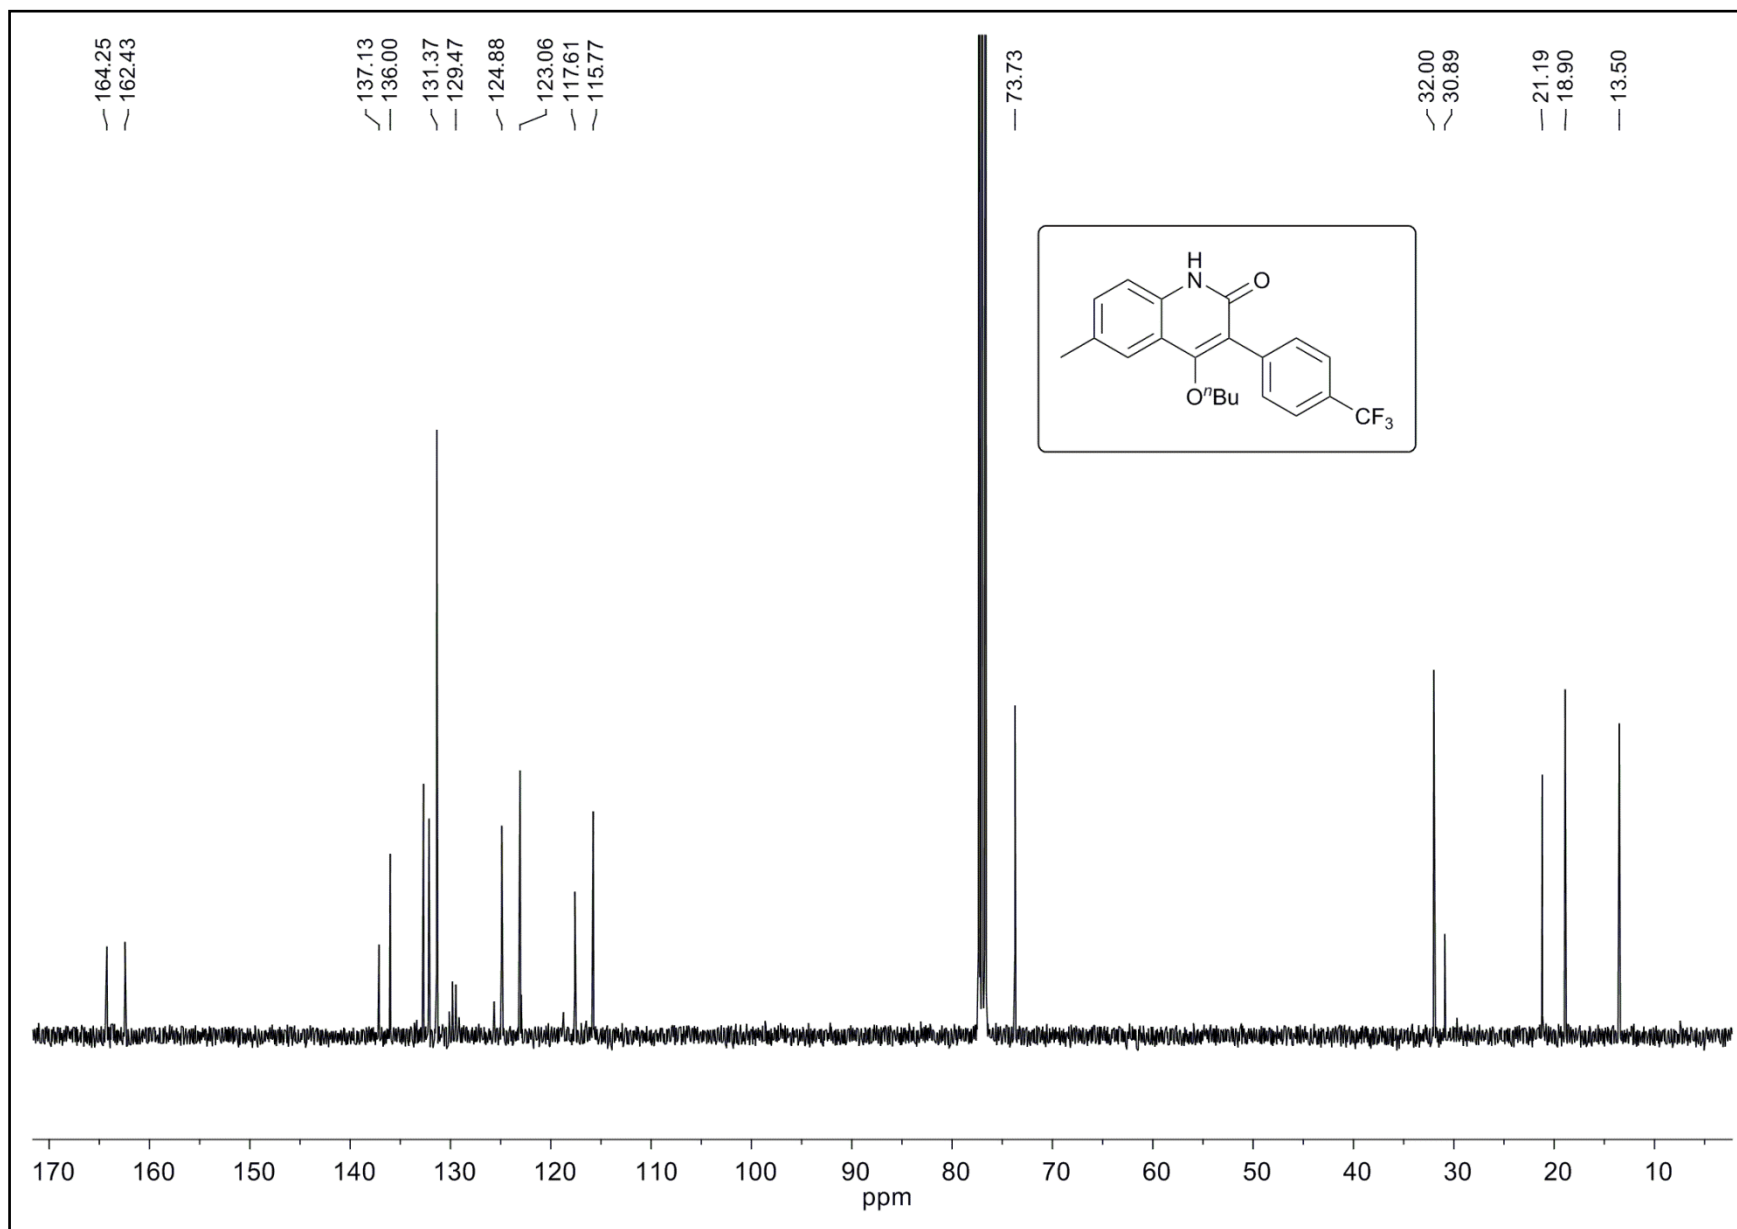

164.25  
162.43

137.13  
136.00  
131.37  
129.47  
124.88  
123.06  
117.61  
115.77

73.73

32.00  
30.89

21.19  
18.90  
13.50

170 160 150 140 130 120 110 100 90 80 70 60 50 40 30 20 10  
ppm
